# Supplementary material
Source: Research Square preprint supplement (doi:10.21203/rs.3.rs-8991205/v1)
Supplement: Supplementary file 1 [file 09203f248943fd0e3ad31dc9.xlsx]

## Sheet: All Somatic Exonic Mutations
Cell Line	Variant Type	Chr	Start	End	Ref Allele	Alt Allele	Nucleotide Change	Region	Gene	Mutation Effect	Transcript	Exon	CDS Change	Protein Change	Addl. Transcripts
NT2.5	Indel	chr1	4348380	4348380	-	T	->T	exonic	Rp1	frameshift insertion	NM_011283	exon4	c.2507dupA	p.S837Efs*8	0
NT2.5	SNV	chr1	24307662	24307662	C	G	C>G	exonic	Col19a1	nonsynonymous SNV	NM_007733	exon35	c.G2312C	p.G771A	0
NT2.5	SNV	chr1	30821140	30821140	C	A	C>A	exonic	Phf3	nonsynonymous SNV	NM_001081080	exon5	c.G2608T	p.A870S	0
NT2.5	SNV	chr1	45817285	45817285	T	C	T>C	exonic	Wdr75	synonymous SNV	NM_028599	exon14	c.T1467C	p.C489C	0
NT2.5	SNV	chr1	59007103	59007103	C	T	C>T	exonic	C2cd6	nonsynonymous SNV	NM_026600	exon18	c.G2548A	p.V850I	0
NT2.5	SNV	chr1	88266452	88266452	C	T	C>T	exonic	A730008H23Rik;Hjurp	nonsynonymous SNV	NM_172505	exon5	c.G505A	p.D169N	1
NT2.5	SNV	chr1	88266561	88266561	A	G	A>G	exonic	A730008H23Rik;Hjurp	synonymous SNV	NM_172505	exon5	c.T396C	p.D132D	1
NT2.5	SNV	chr1	88266616	88266616	T	C	T>C	exonic	A730008H23Rik;Hjurp	nonsynonymous SNV	NM_172505	exon5	c.A341G	p.E114G	1
NT2.5	SNV	chr1	150105457	150105457	A	T	A>T	exonic	Ptgs2	nonsynonymous SNV	NM_011198	exon10	c.A1490T	p.K497I	0
NT2.5	SNV	chr1	150383084	150383084	G	C	G>C	exonic	Odr4	nonsynonymous SNV	NM_001077237	exon6	c.C448G	p.R150G	2
NT2.5	SNV	chr1	153545289	153545289	G	T	G>T	exonic	Npl	synonymous SNV	NM_028749	exon2	c.C42A	p.A14A	0
NT2.5	SNV	chr1	166307821	166307821	G	T	G>T	exonic	Ildr2	nonsynonymous SNV	NM_001357429	exon5	c.G760T	p.D254Y	5
NT2.5	SNV	chr1	174117107	174117107	A	C	A>C	exonic	Olfr231	nonsynonymous SNV	NM_001005520	exon1	c.T908G	p.V303G	0
NT2.5	SNV	chr1	189659176	189659176	A	G	A>G	exonic	Cenpf	nonsynonymous SNV	NM_001081363	exon12	c.T2458C	p.C820R	0
NT2.5	SNV	chr1	189680358	189680358	C	T	C>T	exonic	Cenpf	nonsynonymous SNV	NM_001081363	exon6	c.G707A	p.G236D	0
NT2.5	SNV	chr2	13334788	13334788	A	G	A>G	exonic	Cubn	synonymous SNV	NM_001081084	exon45	c.T6987C	p.A2329A	0
NT2.5	SNV	chr2	29176882	29176882	C	A	C>A	exonic	Setx	nonsynonymous SNV	NM_198033	exon24	c.C7034A	p.A2345E	0
NT2.5	SNV	chr2	69550930	69550930	G	T	G>T	exonic	Lrp2	synonymous SNV	NM_001081088	exon3	c.C210A	p.G70G	0
NT2.5	SNV	chr2	71838385	71838385	G	A	G>A	exonic	Itga6	nonsynonymous SNV	NM_001277970	exon12	c.G1667A	p.R556Q	1
NT2.5	SNV	chr2	76896935	76896935	C	T	C>T	exonic	Ttn	nonsynonymous SNV	NM_011652	exon60	c.G14639A	p.R4880K	1
NT2.5	SNV	chr2	88006155	88006155	C	A	C>A	exonic	Olfr1160	nonsynonymous SNV	NM_146649	exon1	c.G622T	p.V208L	0
NT2.5	SNV	chr2	105004970	105004970	A	G	A>G	exonic	Eif3m	nonsynonymous SNV	NM_145380	exon8	c.T754C	p.Y252H	0
NT2.5	SNV	chr2	111257163	111257163	G	A	G>A	exonic	Olfr1276	nonsynonymous SNV	NM_146395	exon1	c.G47A	p.G16E	0
NT2.5	SNV	chr2	120713794	120713794	G	T	G>T	exonic	Stard9	nonsynonymous SNV	NM_001370940	exon31	c.G13465T	p.D4489Y	0
NT2.5	SNV	chr2	121098975	121098975	T	A	T>A	exonic	Tgm7	unknown					0
NT2.5	SNV	chr2	121303480	121303480	G	C	G>C	exonic	Map1a	nonsynonymous SNV	NM_001173506	exon4	c.G4062C	p.Q1354H	1
NT2.5	SNV	chr2	131308508	131308508	A	G	A>G	exonic	Rnf24	synonymous SNV	NM_178607	exon3	c.T153C	p.H51H	0
NT2.5	SNV	chr2	162966988	162966988	C	T	C>T	exonic	L3mbtl1	nonsynonymous SNV	NM_001081338	exon18	c.C1780T	p.P594S	0
NT2.5	SNV	chr2	163864922	163864922	G	A	G>A	exonic	Rims4	nonsynonymous SNV	NM_001376942	exon5	c.C532T	p.P178S	1
NT2.5	SNV	chr2	163864928	163864928	G	A	G>A	exonic	Rims4	synonymous SNV	NM_001376942	exon5	c.C526T	p.L176L	1
NT2.5	SNV	chr3	36074353	36074353	G	T	G>T	exonic	Acad9	nonsynonymous SNV	NM_172678	exon4	c.G362T	p.G121V	0
NT2.5	SNV	chr3	90038969	90038969	C	A	C>A	exonic	Ubap2l	nonsynonymous SNV	NM_001165983	exon5	c.G327T	p.K109N	8
NT2.5	SNV	chr3	93397681	93397681	C	T	C>T	exonic	Rptn	nonsynonymous SNV	NM_009100	exon3	c.C2320T	p.H774Y	0
NT2.5	SNV	chr3	93446523	93446523	G	A	G>A	exonic	Tchh	nonsynonymous SNV	NM_001163098	exon2	c.G3269A	p.R1090Q	0
NT2.5	SNV	chr3	93446533	93446533	A	G	A>G	exonic	Tchh	synonymous SNV	NM_001163098	exon2	c.A3279G	p.E1093E	0
NT2.5	SNV	chr3	96683623	96683623	G	A	G>A	exonic	Ankrd35	synonymous SNV	NM_001081139	exon10	c.G1224A	p.P408P	3
NT2.5	SNV	chr3	109166426	109166426	C	G	C>G	exonic	Slc25a24	nonsynonymous SNV	NM_172685	exon10	c.C1344G	p.N448K	0
NT2.5	SNV	chr4	40853752	40853752	G	A	G>A	exonic	B4galt1	synonymous SNV	NM_001378519	exon1	c.C15T	p.T5T	1
NT2.5	SNV	chr4	124804965	124804965	G	A	G>A	exonic	Mtf1	synonymous SNV	NM_008636	exon2	c.G255A	p.Q85Q	0
NT2.5	SNV	chr4	129595123	129595123	C	T	C>T	exonic	Eif3i	nonsynonymous SNV	NM_018799	exon6	c.G464A	p.G155D	0
NT2.5	SNV	chr4	146124343	146124343	A	C	A>C	exonic	Zfp987	nonsynonymous SNV	NM_001037926	exon4	c.A344C	p.N115T	0
NT2.5	SNV	chr4	150638679	150638679	T	C	T>C	exonic	Slc45a1	synonymous SNV	NM_001355737	exon5	c.A210G	p.G70G	1
NT2.5	SNV	chr4	156338661	156338661	T	G	T>G	exonic	Vmn2r123	unknown					0
NT2.5	SNV	chr5	6770073	6770073	C	G	C>G	exonic	Zfp804b	nonsynonymous SNV	NM_001163223	exon4	c.G2989C	p.D997H	0
NT2.5	SNV	chr5	14677416	14677416	C	A	C>A	exonic	Pclo	nonsynonymous SNV	NM_001110796	exon5	c.C6287A	p.S2096Y	1
NT2.5	SNV	chr5	41763750	41763750	G	A	G>A	exonic	Nkx3-2	synonymous SNV	NM_007524	exon1	c.C195T	p.G65G	0
NT2.5	SNV	chr5	107419841	107419841	C	T	C>T	exonic	Ephx4	nonsynonymous SNV	NM_001001804	exon5	c.C664T	p.R222C	2
NT2.5	SNV	chr5	117695459	117695459	C	A	C>A	exonic	Ksr2	nonsynonymous SNV	NM_001312914	exon10	c.C1606A	p.P536T	0
NT2.5	SNV	chr5	121315035	121315035	C	T	C>T	exonic	Hectd4	nonsynonymous SNV	NM_181421	exon36	c.C5615T	p.P1872L	0
NT2.5	SNV	chr5	123563495	123563495	G	T	G>T	exonic	Vps33a	nonsynonymous SNV	NM_001359513	exon6	c.C706A	p.L236I	1
NT2.5	SNV	chr5	146484495	146484495	T	C	T>C	exonic	Gm6408	synonymous SNV	NM_001243104	exon5	c.T933C	p.F311F	0
NT2.5	DNP	chr5	146484498	146484499	CA	TT	CA>TT	exonic	Gm6408	nonframeshift substitution	NM_001243104	exon5	c.936_937delinsTT	p.I313F	0
NT2.5	SNV	chr6	97155408	97155408	T	C	T>C	exonic	Tmf1	synonymous SNV	NM_001081111	exon17	c.A3222G	p.V1074V	0
NT2.5	SNV	chr7	3415063	3415063	G	A	G>A	exonic	Cacng8	nonsynonymous SNV	NM_133190	exon4	c.G730A	p.A244T	0
NT2.5	SNV	chr7	3415068	3415068	C	T	C>T	exonic	Cacng8	synonymous SNV	NM_133190	exon4	c.C735T	p.G245G	0
NT2.5	SNV	chr7	5301004	5301004	C	A	C>A	exonic	Nlrp2	nonsynonymous SNV	NM_177690	exon11	c.G2906T	p.S969I	0
NT2.5	SNV	chr7	7681690	7681690	C	A	C>A	exonic	Vmn2r34	nonsynonymous SNV	NM_001105066	exon4	c.G1502T	p.R501M	0
NT2.5	SNV	chr7	29244120	29244120	C	A	C>A	exonic	Yif1b	nonsynonymous SNV	NM_001110201	exon2	c.C97A	p.Q33K	4
NT2.5	SNV	chr7	41043135	41043135	A	G	A>G	exonic	Gm4884	nonsynonymous SNV	NM_183166	exon3	c.A527G	p.D176G	0
NT2.5	SNV	chr7	45999092	45999092	C	T	C>T	exonic	Abcc6	nonsynonymous SNV	NM_018795	exon16	c.G1975A	p.V659I	0
NT2.5	SNV	chr7	63758416	63758416	C	T	C>T	exonic	Otud7a	synonymous SNV	NM_130880	exon14	c.C2466T	p.S822S	0
NT2.5	SNV	chr7	85559337	85559337	G	T	G>T	exonic	Vmn2r70	nonsynonymous SNV	NM_001384914	exon6	c.C1922A	p.T641N	0
NT2.5	SNV	chr7	96888905	96888905	T	A	T>A	exonic	Tenm4	nonsynonymous SNV	NM_001310760	exon29	c.T5684A	p.L1895Q	2
NT2.5	SNV	chr7	104149296	104149296	A	T	A>T	exonic	Ubqlnl	nonsynonymous SNV	NM_198624	exon1	c.T993A	p.N331K	0
NT2.5	SNV	chr7	127969849	127969849	T	C	T>C	exonic	Fus	synonymous SNV	NM_001347649	exon3	c.T171C	p.S57S	1
NT2.5	SNV	chr7	127969854	127969854	A	C	A>C	exonic	Fus	nonsynonymous SNV	NM_001347649	exon3	c.A176C	p.Y59S	1
NT2.5	SNV	chr7	128694394	128694394	A	C	A>C	exonic	Inpp5f	nonsynonymous SNV	NM_001346517	exon6	c.A587C	p.N196T	1
NT2.5	SNV	chr8	4250546	4250546	G	T	G>T	exonic	Tgfbr3l	synonymous SNV	NM_001195258	exon5	c.G723T	p.P241P	0
NT2.5	SNV	chr8	48342694	48342694	T	C	T>C	exonic	Tenm3	synonymous SNV	NM_001145937	exon8	c.A1560G	p.R520R	1
NT2.5	SNV	chr8	88345170	88345170	G	A	G>A	exonic	Brd7	nonsynonymous SNV	NM_001377013	exon9	c.C1066T	p.P356S	5
NT2.5	SNV	chr8	106807051	106807051	C	A	C>A	exonic	Tango6	synonymous SNV	NM_173037	exon16	c.C2808A	p.V936V	0
NT2.5	SNV	chr8	106807053	106807053	C	A	C>A	exonic	Tango6	stopgain	NM_173037	exon16	c.C2810A	p.S937X	0
NT2.5	SNV	chr9	21637285	21637285	T	G	T>G	exonic	Smarca4	nonsynonymous SNV	NM_001174078	exon6	c.T866G	p.M289R	3
NT2.5	SNV	chr9	21637295	21637295	T	C	T>C	exonic	Smarca4	synonymous SNV	NM_001174078	exon6	c.T876C	p.A292A	3
NT2.5	SNV	chr9	31403510	31403510	T	C	T>C	exonic	Nfrkb	nonsynonymous SNV	NM_001359654	exon16	c.T896C	p.F299S	1
NT2.5	SNV	chr9	31403513	31403513	A	G	A>G	exonic	Nfrkb	nonsynonymous SNV	NM_001359654	exon16	c.A899G	p.E300G	1
NT2.5	SNV	chr9	44881227	44881227	G	A	G>A	exonic	Kmt2a	synonymous SNV	NM_001357549	exon1	c.C48T	p.T16T	0
NT2.5	SNV	chr9	45751186	45751186	G	A	G>A	exonic	Dscaml1	nonsynonymous SNV	NM_001081270	exon31	c.G5275A	p.A1759T	0
NT2.5	SNV	chr9	54331911	54331911	G	T	G>T	exonic	Gldn	nonsynonymous SNV	NM_177350	exon5	c.G576T	p.K192N	0
NT2.5	SNV	chr9	88582098	88582098	A	G	A>G	exonic	Trim43a	nonsynonymous SNV	NM_001034906	exon2	c.A61G	p.S21G	1
NT2.5	SNV	chr9	88582110	88582110	A	G	A>G	exonic	Trim43a	nonsynonymous SNV	NM_001034906	exon2	c.A73G	p.N25D	1
NT2.5	SNV	chr9	107635109	107635109	G	A	G>A	exonic	Gnai2	nonsynonymous SNV	NM_008138	exon1	c.C109T	p.L37F	0
NT2.5	SNV	chr10	8850377	8850377	G	A	G>A	exonic	Sash1	stopgain	NM_175155	exon2	c.C250T	p.Q84X	0
NT2.5	SNV	chr10	20208789	20208789	G	T	G>T	exonic	Rpl32l	nonsynonymous SNV	NM_001101561	exon1	c.G300T	p.K100N	0
NT2.5	SNV	chr10	20208793	20208793	A	T	A>T	exonic	Rpl32l	nonsynonymous SNV	NM_001101561	exon1	c.A304T	p.T102S	0
NT2.5	SNV	chr10	40007388	40007388	A	G	A>G	exonic	Mfsd4b1	nonsynonymous SNV	NM_144821	exon2	c.T65C	p.L22P	0
NT2.5	SNV	chr10	42806625	42806625	G	A	G>A	exonic	Sec63	synonymous SNV	NM_001359284	exon12	c.G891A	p.A297A	4
NT2.5	SNV	chr10	51480743	51480743	G	T	G>T	exonic	Lilr4b	synonymous SNV	NM_001291893	exon1	c.G24T	p.L8L	1
NT2.5	SNV	chr10	76488387	76488387	A	G	A>G	exonic	Mcm3ap	nonsynonymous SNV	NM_019434	exon11	c.A2653G	p.S885G	0
NT2.5	SNV	chr10	79481518	79481518	G	A	G>A	exonic	Vmn2r83	nonsynonymous SNV	NM_001104537	exon5	c.G1594A	p.V532I	0
NT2.5	SNV	chr10	117278121	117278121	T	C	T>C	exonic	Lyz2	stoploss	NM_017372	exon4	c.A447G	p.X149W	0
NT2.5	SNV	chr11	59128314	59128314	C	T	C>T	exonic	Obscn	nonsynonymous SNV	NM_001171512	exon8	c.G2597A	p.G866E	1
NT2.5	SNV	chr11	67921897	67921897	T	C	T>C	exonic	Usp43	nonsynonymous SNV	NM_001291049	exon1	c.A152G	p.Q51R	1
NT2.5	SNV	chr11	67921915	67921915	G	T	G>T	exonic	Usp43	nonsynonymous SNV	NM_001291049	exon1	c.C134A	p.P45Q	1
NT2.5	SNV	chr11	69742730	69742730	T	G	T>G	exonic	Polr2a	synonymous SNV	NM_001291068	exon15	c.A2529C	p.G843G	0
NT2.5	SNV	chr11	71218058	71218058	T	C	T>C	exonic	Nlrp1b	nonsynonymous SNV	NM_001040696	exon3	c.A616G	p.K206E	0
NT2.5	SNV	chr11	77137622	77137622	A	G	A>G	exonic	Efcab5	synonymous SNV	NM_176965	exon5	c.T1290C	p.T430T	0
NT2.5	SNV	chr11	77137637	77137637	C	T	C>T	exonic	Efcab5	synonymous SNV	NM_176965	exon5	c.G1275A	p.S425S	0
NT2.5	SNV	chr11	98436593	98436593	T	G	T>G	exonic	Erbb2	synonymous SNV	NM_001003817	exon27	c.T3696G	p.G1232G	0
NT2.5	SNV	chr11	98436607	98436607	C	A	C>A	exonic	Erbb2	nonsynonymous SNV	NM_001003817	exon27	c.C3710A	p.T1237N	0
NT2.5	SNV	chr11	98649213	98649213	G	T	G>T	exonic	Gsdma2	startloss	NM_001363220	exon2	c.G160T	p.V54L	2
NT2.5	SNV	chr11	111071787	111071787	G	A	G>A	exonic	Kcnj2	nonsynonymous SNV	NM_008425	exon2	c.G4A	p.G2S	0
NT2.5	SNV	chr11	111071808	111071808	T	C	T>C	exonic	Kcnj2	nonsynonymous SNV	NM_008425	exon2	c.T25C	p.Y9H	0
NT2.5LM	SNV	chr1	14755607	14755607	C	A	C>A	exonic	Msc	stopgain	NM_001360810	exon1	c.G142T	p.E48X	1
NT2.5LM	SNV	chr1	20520293	20520293	G	C	G>C	exonic	Pkhd1	nonsynonymous SNV	NM_153179	exon33	c.C5229G	p.C1743W	0
NT2.5LM	SNV	chr1	24307662	24307662	C	G	C>G	exonic	Col19a1	nonsynonymous SNV	NM_007733	exon35	c.G2312C	p.G771A	0
NT2.5LM	SNV	chr1	30821140	30821140	C	A	C>A	exonic	Phf3	nonsynonymous SNV	NM_001081080	exon5	c.G2608T	p.A870S	0
NT2.5LM	SNV	chr1	36549898	36549898	G	C	G>C	exonic	Sema4c	nonsynonymous SNV	NM_001126047	exon15	c.C2146G	p.P716A	2
NT2.5LM	SNV	chr1	36550526	36550526	T	G	T>G	exonic	Sema4c	nonsynonymous SNV	NM_001126047	exon14	c.A1655C	p.N552T	2
NT2.5LM	SNV	chr1	43075396	43075396	G	A	G>A	exonic	Tgfbrap1	synonymous SNV	NM_001357299	exon2	c.C543T	p.C181C	1
NT2.5LM	SNV	chr1	44174246	44174246	C	A	C>A	exonic	Ercc5	nonsynonymous SNV	NM_011729	exon11	c.C2401A	p.Q801K	0
NT2.5LM	SNV	chr1	45329068	45329068	C	A	C>A	exonic	Col3a1	nonsynonymous SNV	NM_009930	exon13	c.C910A	p.P304T	0
NT2.5LM	SNV	chr1	46224714	46224714	C	A	C>A	exonic	Dnah7b	nonsynonymous SNV	NM_001368717	exon38	c.C6223A	p.L2075I	0
NT2.5LM	SNV	chr1	52648765	52648765	G	T	G>T	exonic	Nemp2	nonsynonymous SNV	NM_001142647	exon8	c.G966T	p.W322C	0
NT2.5LM	SNV	chr1	75258557	75258557	G	A	G>A	exonic	Ptprn	nonsynonymous SNV	NM_001359281	exon5	c.C188T	p.A63V	1
NT2.5LM	SNV	chr1	75427733	75427733	C	A	C>A	exonic	Speg	nonsynonymous SNV	NM_001085370	exon33	c.C6076A	p.P2026T	1
NT2.5LM	SNV	chr1	83159804	83159804	G	A	G>A	exonic	Daw1	synonymous SNV	NM_001372243	exon1	c.G6A	p.K2K	3
NT2.5LM	SNV	chr1	88232257	88232257	G	T	G>T	exonic	Mroh2a	nonsynonymous SNV	NM_001281466	exon6	c.G570T	p.M190I	0
NT2.5LM	SNV	chr1	88266121	88266121	G	A	G>A	exonic	A730008H23Rik;Hjurp	nonsynonymous SNV	NM_172505	exon5	c.C836T	p.S279F	1
NT2.5LM	SNV	chr1	88266452	88266452	C	T	C>T	exonic	A730008H23Rik;Hjurp	nonsynonymous SNV	NM_172505	exon5	c.G505A	p.D169N	1
NT2.5LM	SNV	chr1	88266561	88266561	A	G	A>G	exonic	A730008H23Rik;Hjurp	synonymous SNV	NM_172505	exon5	c.T396C	p.D132D	1
NT2.5LM	SNV	chr1	88266616	88266616	T	C	T>C	exonic	A730008H23Rik;Hjurp	nonsynonymous SNV	NM_172505	exon5	c.A341G	p.E114G	1
NT2.5LM	SNV	chr1	97777332	97777332	A	C	A>C	exonic	Gin1	nonsynonymous SNV	NM_001310773	exon3	c.A146C	p.K49T	1
NT2.5LM	SNV	chr1	116442328	116442328	A	G	A>G	exonic	Cntnap5a	nonsynonymous SNV	NM_001077425	exon17	c.A2674G	p.N892D	1
NT2.5LM	SNV	chr1	120607168	120607168	G	T	G>T	exonic	En1	nonsynonymous SNV	NM_010133	exon2	c.G1185T	p.Q395H	0
NT2.5LM	SNV	chr1	131609579	131609579	G	A	G>A	exonic	Avpr1b	nonsynonymous SNV	NM_011924	exon2	c.G1100A	p.S367N	0
NT2.5LM	SNV	chr1	132521266	132521266	G	A	G>A	exonic	Cntn2	synonymous SNV	NM_177129	exon16	c.C2004T	p.N668N	0
NT2.5LM	SNV	chr1	150105457	150105457	A	T	A>T	exonic	Ptgs2	nonsynonymous SNV	NM_011198	exon10	c.A1490T	p.K497I	0
NT2.5LM	SNV	chr1	150383084	150383084	G	C	G>C	exonic	Odr4	nonsynonymous SNV	NM_001077237	exon6	c.C448G	p.R150G	2
NT2.5LM	SNV	chr1	155933345	155933345	G	C	G>C	exonic	Cep350	nonsynonymous SNV	NM_001039184	exon10	c.C1484G	p.T495S	0
NT2.5LM	SNV	chr1	156845027	156845027	T	G	T>G	exonic	Angptl1	nonsynonymous SNV	NM_028333	exon2	c.T422G	p.I141S	0
NT2.5LM	SNV	chr1	161101585	161101585	G	C	G>C	exonic	Klhl20	nonsynonymous SNV	NM_001039482	exon7	c.C1002G	p.D334E	0
NT2.5LM	SNV	chr1	166307821	166307821	G	T	G>T	exonic	Ildr2	nonsynonymous SNV	NM_001357429	exon5	c.G760T	p.D254Y	5
NT2.5LM	SNV	chr1	174117107	174117107	A	C	A>C	exonic	Olfr231	nonsynonymous SNV	NM_001005520	exon1	c.T908G	p.V303G	0
NT2.5LM	SNV	chr1	177775636	177775636	T	G	T>G	exonic	Adss	nonsynonymous SNV	NM_007422	exon7	c.A608C	p.K203T	0
NT2.5LM	SNV	chr1	181922441	181922441	G	C	G>C	exonic	Enah	nonsynonymous SNV	NM_001083120	exon6	c.C775G	p.P259A	2
NT2.5LM	Indel	chr1	185373028	185373028	T	-	T>-	exonic	Eprs	frameshift deletion	NM_001357474	exon5	c.499delT	p.W167Gfs*32	1
NT2.5LM	SNV	chr1	188444561	188444561	T	C	T>C	exonic	Ush2a	synonymous SNV	NM_021408	exon17	c.T3921C	p.S1307S	0
NT2.5LM	SNV	chr2	13334788	13334788	A	G	A>G	exonic	Cubn	synonymous SNV	NM_001081084	exon45	c.T6987C	p.A2329A	0
NT2.5LM	SNV	chr2	19303820	19303820	T	C	T>C	exonic	Armc3	synonymous SNV	NM_001271563	exon18	c.T2262C	p.G754G	2
NT2.5LM	SNV	chr2	25055733	25055733	C	G	C>G	exonic	Nsmf	synonymous SNV	NM_001039386	exon3	c.C231G	p.G77G	4
NT2.5LM	SNV	chr2	29176882	29176882	C	A	C>A	exonic	Setx	nonsynonymous SNV	NM_198033	exon24	c.C7034A	p.A2345E	0
NT2.5LM	SNV	chr2	32686803	32686803	T	C	T>C	exonic	Fpgs	nonsynonymous SNV	NM_010236	exon10	c.A905G	p.Q302R	0
NT2.5LM	SNV	chr2	35100635	35100635	G	A	G>A	exonic	AI182371	stopgain	NM_001243102	exon1	c.C19T	p.Q7X	5
NT2.5LM	SNV	chr2	35321569	35321569	C	G	C>G	exonic	Stom	nonsynonymous SNV	NM_013515	exon5	c.G439C	p.A147P	0
NT2.5LM	Indel	chr2	41268392	41268393	TG	-	TG>-	exonic	Lrp1b	frameshift deletion	NM_053011	exon31	c.5153_5154del	p.A1718Efs*6.	0
NT2.5LM	SNV	chr2	43780627	43780627	A	G	A>G	exonic	Arhgap15	nonsynonymous SNV	NM_001301831	exon2	c.A22G	p.S8G	1
NT2.5LM	SNV	chr2	68732063	68732063	G	T	G>T	exonic	4932414N04Rik	stopgain	NM_183113	exon22	c.G1033T	p.G345X	0
NT2.5LM	SNV	chr2	69161071	69161071	C	A	C>A	exonic	Nostrin	nonsynonymous SNV	NM_181547	exon7	c.C407A	p.A136D	0
NT2.5LM	SNV	chr2	69550930	69550930	G	T	G>T	exonic	Lrp2	synonymous SNV	NM_001081088	exon3	c.C210A	p.G70G	0
NT2.5LM	SNV	chr2	76585049	76585049	G	A	G>A	exonic	Osbpl6	nonsynonymous SNV	NM_001290734	exon17	c.G1637A	p.R546H	2
NT2.5LM	SNV	chr2	76739025	76739025	C	A	C>A	exonic	Ttn	nonsynonymous SNV	NM_028004	exon154	c.G56542T	p.V18848F	2
NT2.5LM	SNV	chr2	76790818	76790818	G	C	G>C	exonic	Ttn	nonsynonymous SNV	NM_028004	exon91	c.C22192G	p.P7398A	2
NT2.5LM	SNV	chr2	76891324	76891324	C	T	C>T	exonic	Ttn	nonsynonymous SNV	NM_011652	exon69	c.G17353A	p.V5785I	1
NT2.5LM	SNV	chr2	76896935	76896935	C	T	C>T	exonic	Ttn	nonsynonymous SNV	NM_011652	exon60	c.G14639A	p.R4880K	1
NT2.5LM	SNV	chr2	82984522	82984522	C	A	C>A	exonic	Fsip2	nonsynonymous SNV	NM_001370266	exon17	c.C10592A	p.S3531Y	0
NT2.5LM	SNV	chr2	85648051	85648051	T	G	T>G	exonic	Olfr1002	nonsynonymous SNV	NM_146573	exon1	c.A269C	p.K90T	0
NT2.5LM	SNV	chr2	86922824	86922824	T	C	T>C	exonic	Olfr1098	nonsynonymous SNV	NM_146845	exon1	c.A707G	p.K236R	0
NT2.5LM	SNV	chr2	86922975	86922975	C	A	C>A	exonic	Olfr1098	nonsynonymous SNV	NM_146845	exon1	c.G556T	p.A186S	0
NT2.5LM	SNV	chr2	87192172	87192172	G	T	G>T	exonic	Olfr1112	nonsynonymous SNV	NM_146661	exon1	c.G484T	p.V162F	0
NT2.5LM	SNV	chr2	87949311	87949311	A	C	A>C	exonic	Olfr1156	synonymous SNV	NM_146817	exon1	c.T921G	p.S307S	0
NT2.5LM	SNV	chr2	88224250	88224250	A	C	A>C	exonic	Olfr1170	nonsynonymous SNV	NM_146532	exon1	c.T781G	p.Y261D	0
NT2.5LM	SNV	chr2	88339900	88339900	C	A	C>A	exonic	Olfr1176	nonsynonymous SNV	NM_146771	exon1	c.C334A	p.Q112K	0
NT2.5LM	SNV	chr2	89097603	89097603	C	A	C>A	exonic	Olfr1220	nonsynonymous SNV	NM_146900	exon1	c.G323T	p.G108V	0
NT2.5LM	SNV	chr2	89303179	89303179	G	A	G>A	exonic	Olfr1231	nonsynonymous SNV	NM_146454	exon1	c.C412T	p.R138C	0
NT2.5LM	SNV	chr2	89418223	89418223	G	T	G>T	exonic	Olfr1239	stopgain	NM_146970	exon1	c.C189A	p.Y63X	0
NT2.5LM	SNV	chr2	110265488	110265488	C	A	C>A	exonic	Bbox1	nonsynonymous SNV	NM_130452	exon7	c.G1130T	p.R377L	0
NT2.5LM	SNV	chr2	111257163	111257163	G	A	G>A	exonic	Olfr1276	nonsynonymous SNV	NM_146395	exon1	c.G47A	p.G16E	0
NT2.5LM	SNV	chr2	113833515	113833515	T	C	T>C	exonic	Arhgap11a	nonsynonymous SNV	NM_181416	exon12	c.A2422G	p.T808A	0
NT2.5LM	SNV	chr2	116063400	116063400	G	C	G>C	exonic	Meis2	stopgain	NM_001136072	exon2	c.C33G	p.Y11X	11
NT2.5LM	SNV	chr2	120056400	120056400	G	A	G>A	exonic	Sptbn5	synonymous SNV	NM_001370938	exon44	c.C7297T	p.L2433L	0
NT2.5LM	SNV	chr2	120713794	120713794	G	T	G>T	exonic	Stard9	nonsynonymous SNV	NM_001370940	exon31	c.G13465T	p.D4489Y	0
NT2.5LM	SNV	chr2	121098975	121098975	T	A	T>A	exonic	Tgm7	unknown					0
NT2.5LM	SNV	chr2	121303480	121303480	G	C	G>C	exonic	Map1a	nonsynonymous SNV	NM_001173506	exon4	c.G4062C	p.Q1354H	1
NT2.5LM	SNV	chr2	130504191	130504191	G	C	G>C	exonic	Ptpra	nonsynonymous SNV	NM_001163688	exon3	c.G271C	p.A91P	2
NT2.5LM	SNV	chr2	131144607	131144607	C	T	C>T	exonic	Hspa12b	synonymous SNV	NM_028306	exon13	c.C1447T	p.L483L	0
NT2.5LM	SNV	chr2	151504162	151504162	G	T	G>T	exonic	Nsfl1c	nonsynonymous SNV	NM_001291074	exon5	c.G496T	p.A166S	1
NT2.5LM	SNV	chr2	153987150	153987150	C	G	C>G	exonic	Bpifa6	nonsynonymous SNV	NM_001080811	exon5	c.C596G	p.T199S	0
NT2.5LM	SNV	chr2	161560231	161560231	C	A	C>A	exonic	Ptprt	nonsynonymous SNV	NM_021464	exon21	c.G3019T	p.V1007F	3
NT2.5LM	SNV	chr2	163728162	163728162	C	G	C>G	exonic	Ada	nonsynonymous SNV	NM_001272052	exon10	c.G930C	p.M310I	1
NT2.5LM	SNV	chr2	164168489	164168489	G	A	G>A	exonic	Kcns1	synonymous SNV	NM_008435	exon3	c.C349T	p.L117L	0
NT2.5LM	SNV	chr2	178283020	178283020	G	A	G>A	exonic	Phactr3	synonymous SNV	NM_001007154	exon6	c.G639A	p.A213A	4
NT2.5LM	SNV	chr3	14481390	14481390	G	T	G>T	exonic	Slc7a12	nonsynonymous SNV	NM_080852	exon1	c.G594T	p.Q198H	0
NT2.5LM	Indel	chr3	38982256	38982256	G	-	G>-	exonic	Fat4	stopgain	NM_183221	exon9	c.10056delG	p.M3353*.	0
NT2.5LM	SNV	chr3	38982258	38982258	T	A	T>A	exonic	Fat4	nonsynonymous SNV	NM_183221	exon9	c.T10058A	p.M3353K	0
NT2.5LM	SNV	chr3	64388835	64388835	G	A	G>A	exonic	Vmn2r4	nonsynonymous SNV	NM_001104615	exon5	c.C2261T	p.A754V	1
NT2.5LM	SNV	chr3	68927772	68927772	C	T	C>T	exonic	Ift80	synonymous SNV	NM_026641	exon13	c.G1335A	p.A445A	0
NT2.5LM	SNV	chr3	82038060	82038060	A	G	A>G	exonic	Gucy1b1	nonsynonymous SNV	NM_001161796	exon10	c.T1270C	p.F424L	1
NT2.5LM	SNV	chr3	87976050	87976050	G	C	G>C	exonic	Nes	nonsynonymous SNV	NM_016701	exon4	c.G1615C	p.E539Q	0
NT2.5LM	SNV	chr3	88440723	88440723	G	T	G>T	exonic	Sema4a	nonsynonymous SNV	NM_001163489	exon11	c.C1290A	p.S430R	3
NT2.5LM	SNV	chr3	89367165	89367165	G	T	G>T	exonic	Dcst2	nonsynonymous SNV	NM_001370853	exon5	c.G711T	p.Q237H	0
NT2.5LM	SNV	chr3	90038969	90038969	C	A	C>A	exonic	Ubap2l	nonsynonymous SNV	NM_001165983	exon5	c.G327T	p.K109N	8
NT2.5LM	SNV	chr3	93203666	93203666	T	C	T>C	exonic	Flg2	synonymous SNV	NM_001013804	exon4	c.T3000C	p.G1000G	0
NT2.5LM	SNV	chr3	93203669	93203669	T	G	T>G	exonic	Flg2	nonsynonymous SNV	NM_001013804	exon4	c.T3003G	p.H1001Q	0
NT2.5LM	SNV	chr3	93219765	93219765	T	G	T>G	exonic	Flg2	nonsynonymous SNV	NM_001013804	exon7	c.T5977G	p.L1993V	0
NT2.5LM	SNV	chr3	96145093	96145093	G	T	G>T	exonic	Otud7b	stopgain	NM_001025614	exon6	c.G730T	p.E244X	1
NT2.5LM	SNV	chr3	98104353	98104353	C	G	C>G	exonic	Notch2	nonsynonymous SNV	NM_010928	exon11	c.C1686G	p.F562L	0
NT2.5LM	SNV	chr3	100100323	100100323	C	A	C>A	exonic	Spag17	nonsynonymous SNV	NM_028892	exon41	c.C5808A	p.S1936R	0
NT2.5LM	SNV	chr3	103279884	103279884	G	T	G>T	exonic	Trim33	synonymous SNV	NM_001079830	exon1	c.G6T	p.A2A	1
NT2.5LM	Indel	chr3	105459187	105459187	C	-	C>-	exonic	Kcnd3	frameshift deletion	NM_001039347	exon2	c.372delC	p.E126Rfs*63	1
NT2.5LM	SNV	chr3	108960265	108960265	G	A	G>A	exonic	Henmt1	nonsynonymous SNV	NM_001078646	exon8	c.G1115A	p.C372Y	1
NT2.5LM	SNV	chr3	109166426	109166426	C	G	C>G	exonic	Slc25a24	nonsynonymous SNV	NM_172685	exon10	c.C1344G	p.N448K	0
NT2.5LM	SNV	chr3	142853484	142853484	T	A	T>A	exonic	Pkn2	nonsynonymous SNV	NM_178654	exon2	c.A279T	p.L93F	0
NT2.5LM	SNV	chr4	4070011	4070011	C	T	C>T	exonic	Sdr16c6	nonsynonymous SNV	NM_001080710	exon3	c.G328A	p.E110K	0
NT2.5LM	SNV	chr4	11785132	11785132	T	A	T>A	exonic	Cdh17	nonsynonymous SNV	NM_019753	exon9	c.T923A	p.F308Y	0
NT2.5LM	SNV	chr4	45314304	45314304	C	A	C>A	exonic	Trmt10b	synonymous SNV	NM_027266	exon8	c.C745A	p.R249R	0
NT2.5LM	SNV	chr4	123297953	123297953	C	A	C>A	exonic	Pabpc4	nonsynonymous SNV	NM_001356377	exon13	c.C1768A	p.L590M	2
NT2.5LM	SNV	chr4	132494598	132494598	A	T	A>T	exonic	Sesn2	nonsynonymous SNV	NM_144907	exon9	c.T1222A	p.Y408N	0
NT2.5LM	SNV	chr4	140575322	140575322	G	T	G>T	exonic	Arhgef10l	nonsynonymous SNV	NM_001112722	exon14	c.C1423A	p.L475M	3
NT2.5LM	SNV	chr4	146464429	146464429	C	A	C>A	exonic	Zfp991;Zfp992	nonsynonymous SNV	NM_001085522	exon3	c.C56A	p.A19D	1
NT2.5LM	SNV	chr4	153432839	153432839	C	T	C>T	exonic	Ajap1	nonsynonymous SNV	NM_001099299	exon2	c.G44A	p.R15H	0
NT2.5LM	SNV	chr4	154839046	154839046	A	G	A>G	exonic	Ttc34	nonsynonymous SNV	NM_172878	exon2	c.A211G	p.I71V	0
NT2.5LM	SNV	chr5	6770073	6770073	C	G	C>G	exonic	Zfp804b	nonsynonymous SNV	NM_001163223	exon4	c.G2989C	p.D997H	0
NT2.5LM	SNV	chr5	14677416	14677416	C	A	C>A	exonic	Pclo	nonsynonymous SNV	NM_001110796	exon5	c.C6287A	p.S2096Y	1
NT2.5LM	SNV	chr5	14714115	14714115	T	C	T>C	exonic	Pclo	nonsynonymous SNV	NM_001110796	exon7	c.T12601C	p.S4201P	1
NT2.5LM	DNP	chr5	34551647	34551648	CG	GC	CG>GC	exonic	Sh3bp2	nonframeshift substitution	NM_001145858	exon2	c.215_216delinsGC	p.A72G	2
NT2.5LM	SNV	chr5	39614561	39614561	G	T	G>T	exonic	Hs3st1	nonsynonymous SNV	NM_010474	exon2	c.C738A	p.N246K	0
NT2.5LM	SNV	chr5	41795119	41795119	T	C	T>C	exonic	Bod1l	nonsynonymous SNV	NM_001081422	exon23	c.A8555G	p.D2852G	1
NT2.5LM	SNV	chr5	52741819	52741819	C	A	C>A	exonic	Pi4k2b	nonsynonymous SNV	NM_025951	exon1	c.C101A	p.A34E	1
NT2.5LM	SNV	chr5	69110368	69110368	C	G	C>G	exonic	Kctd8	nonsynonymous SNV	NM_175519	exon2	c.G1398C	p.W466C	0
NT2.5LM	SNV	chr5	73629704	73629704	A	C	A>C	exonic	Lrrc66	stopgain	NM_153568	exon2	c.T302G	p.L101X	0
NT2.5LM	SNV	chr5	74585062	74585062	A	G	A>G	exonic	Fip1l1	synonymous SNV	NM_024183	exon12	c.A1011G	p.V337V	3
NT2.5LM	SNV	chr5	90264115	90264115	C	G	C>G	exonic	Ankrd17	nonsynonymous SNV	NM_198010	exon20	c.G3136C	p.G1046R	1
NT2.5LM	Indel	chr5	110353083	110353085	GCC	-	GCC>-	exonic	Lrcol1	nonframeshift deletion	NM_001310709	exon2	c.18_20del	p.P8del.	0
NT2.5LM	SNV	chr5	117695459	117695459	C	A	C>A	exonic	Ksr2	nonsynonymous SNV	NM_001312914	exon10	c.C1606A	p.P536T	0
NT2.5LM	SNV	chr5	121315035	121315035	C	T	C>T	exonic	Hectd4	nonsynonymous SNV	NM_181421	exon36	c.C5615T	p.P1872L	0
NT2.5LM	SNV	chr5	121328206	121328206	G	A	G>A	exonic	Hectd4	nonsynonymous SNV	NM_181421	exon46	c.G7199A	p.R2400Q	0
NT2.5LM	SNV	chr5	124133181	124133181	A	G	A>G	exonic	Pitpnm2	nonsynonymous SNV	NM_001289472	exon9	c.T1202C	p.L401P	1
NT2.5LM	SNV	chr5	124283641	124283641	G	A	G>A	exonic	Mphosph9	nonsynonymous SNV	NM_001081323	exon14	c.C2236T	p.R746W	1
NT2.5LM	DNP	chr5	138444858	138444859	AT	TG	AT>TG	exonic	Zfp157	nonframeshift substitution	NM_028130	exon2	c.110_111delinsTG	p.Y37L	0
NT2.5LM	SNV	chr5	140524637	140524637	G	C	G>C	exonic	Chst12	nonsynonymous SNV	NM_021528	exon2	c.G1018C	p.D340H	0
NT2.5LM	Indel	chr5	144997059	144997059	G	-	G>-	exonic	Kpna7	frameshift deletion	NM_001347531	exon7	c.886delC	p.H296Ifs*4	1
NT2.5LM	SNV	chr5	145569414	145569414	C	A	C>A	exonic	Cyp3a41a;Cyp3a41b	nonsynonymous SNV	NM_001105159	exon9	c.G825T	p.M275I	1
NT2.5LM	SNV	chr5	147274564	147274564	T	G	T>G	exonic	Pdx1	synonymous SNV	NM_008814	exon2	c.T594G	p.R198R	0
NT2.5LM	SNV	chr5	150541317	150541317	A	C	A>C	exonic	Brca2	nonsynonymous SNV	NM_001081001	exon11	c.A4545C	p.K1515N	1
NT2.5LM	SNV	chr6	34857697	34857697	C	A	C>A	exonic	Agbl3	nonsynonymous SNV	NM_001289657	exon19	c.C2086A	p.Q696K	2
NT2.5LM	SNV	chr6	52314118	52314118	C	T	C>T	exonic	Evx1	nonsynonymous SNV	NM_007966	exon1	c.C274T	p.L92F	0
NT2.5LM	SNV	chr6	83054092	83054092	C	G	C>G	exonic	Htra2	nonsynonymous SNV	NM_019752	exon1	c.G335C	p.G112A	0
NT2.5LM	SNV	chr6	97112160	97112160	G	C	G>C	exonic	Eogt	nonsynonymous SNV	NM_175313	exon18	c.C1484G	p.S495C	0
NT2.5LM	SNV	chr6	114678057	114678057	G	T	G>T	exonic	Atg7	nonsynonymous SNV	NM_001379130	exon4	c.G369T	p.E123D	3
NT2.5LM	SNV	chr6	121031044	121031044	C	T	C>T	exonic	Mical3	nonsynonymous SNV	NM_001270475	exon10	c.G1402A	p.V468I	1
NT2.5LM	SNV	chr6	124826306	124826306	C	A	C>A	exonic	Usp5	nonsynonymous SNV	NM_001326594	exon2	c.G230T	p.R77L	1
NT2.5LM	SNV	chr6	125186123	125186123	T	C	T>C	exonic	Ncapd2	nonsynonymous SNV	NM_146171	exon5	c.A421G	p.I141V	0
NT2.5LM	SNV	chr6	127657924	127657924	G	T	G>T	exonic	Cracr2a	nonsynonymous SNV	NM_001368877	exon16	c.G1917T	p.E639D	0
NT2.5LM	SNV	chr6	129467534	129467534	C	A	C>A	exonic	Clec7a	nonsynonymous SNV	NM_001309637	exon3	c.G337T	p.D113Y	0
NT2.5LM	SNV	chr6	140583915	140583915	G	C	G>C	exonic	Plekha5	nonsynonymous SNV	NM_144920	exon26	c.G3102C	p.L1034F	0
NT2.5LM	SNV	chr6	145048691	145048691	G	C	G>C	exonic	Bcat1	nonsynonymous SNV	NM_001024468	exon1	c.C79G	p.P27A	0
NT2.5LM	SNV	chr6	148809915	148809915	A	T	A>T	exonic	Ipo8	nonsynonymous SNV	NM_001081113	exon8	c.T874A	p.F292I	0
NT2.5LM	SNV	chr7	3716812	3716812	A	T	A>T	exonic	Pirb	nonsynonymous SNV	NM_001357394	exon7	c.T1334A	p.F445Y	1
NT2.5LM	SNV	chr7	4276486	4276486	A	G	A>G	exonic	Pira6	nonsynonymous SNV	NM_008848	exon5	c.A709G	p.T237A	0
NT2.5LM	SNV	chr7	4707906	4707906	G	A	G>A	exonic	Brsk1	nonsynonymous SNV	NM_001003920	exon15	c.G1726A	p.A576T	0
NT2.5LM	SNV	chr7	4794489	4794489	C	G	C>G	exonic	Rpl28	synonymous SNV	NM_009081	exon5	c.C396G	p.R132R	0
NT2.5LM	SNV	chr7	5301004	5301004	C	A	C>A	exonic	Nlrp2	nonsynonymous SNV	NM_177690	exon11	c.G2906T	p.S969I	0
NT2.5LM	SNV	chr7	16134306	16134306	C	A	C>A	exonic	Slc8a2	nonsynonymous SNV	NM_001347561	exon2	c.C462A	p.N154K	1
NT2.5LM	SNV	chr7	21012226	21012226	G	T	G>T	exonic	Vmn1r119	nonsynonymous SNV	NM_001166708	exon1	c.C230A	p.A77D	0
NT2.5LM	Indel	chr7	27197176	27197211	CCCCCTCCCCCCCCTCCTGCTCCTCCCCCTCCCCCT	-	CCCCCTCCCCCCCCTCCTGCTCCTCCCCCTCCCCCT>-	exonic	BC024978	nonframeshift deletion	NM_001243888	exon2	c.163_198del		0
NT2.5LM	SNV	chr7	29244120	29244120	C	A	C>A	exonic	Yif1b	nonsynonymous SNV	NM_001110201	exon2	c.C97A	p.Q33K	4
NT2.5LM	SNV	chr7	29339164	29339164	T	C	T>C	exonic	Sipa1l3	nonsynonymous SNV	NM_001081028	exon17	c.A4204G	p.R1402G	0
NT2.5LM	SNV	chr7	29725347	29725347	A	G	A>G	exonic	Catsperg2	synonymous SNV	NM_029714	exon2	c.T123C	p.A41A	0
NT2.5LM	SNV	chr7	29725349	29725349	C	T	C>T	exonic	Catsperg2	nonsynonymous SNV	NM_029714	exon2	c.G121A	p.A41T	0
NT2.5LM	SNV	chr7	35603889	35603889	G	T	G>T	exonic	Ankrd27	nonsynonymous SNV	NM_001358876	exon8	c.G693T	p.M231I	2
NT2.5LM	SNV	chr7	45866565	45866565	C	T	C>T	exonic	Grin2d	startloss	NM_008172	exon1	c.G3A	p.M1?	0
NT2.5LM	SNV	chr7	45999092	45999092	C	T	C>T	exonic	Abcc6	nonsynonymous SNV	NM_018795	exon16	c.G1975A	p.V659I	0
NT2.5LM	SNV	chr7	56293766	56293766	C	A	C>A	exonic	Oca2	nonsynonymous SNV	NM_021879	exon7	c.C686A	p.A229E	0
NT2.5LM	SNV	chr7	66069206	66069206	T	G	T>G	exonic	Snrpa1	nonsynonymous SNV	NM_021336	exon4	c.T349G	p.Y117D	0
NT2.5LM	SNV	chr7	83652846	83652846	A	C	A>C	exonic	Il16	nonsynonymous SNV	NM_001360089	exon2	c.T67G	p.L23V	3
NT2.5LM	SNV	chr7	85559337	85559337	G	T	G>T	exonic	Vmn2r70	nonsynonymous SNV	NM_001384914	exon6	c.C1922A	p.T641N	0
NT2.5LM	SNV	chr7	103565035	103565035	C	A	C>A	exonic	Olfr616	synonymous SNV	NM_147099	exon1	c.G243T	p.P81P	0
NT2.5LM	SNV	chr7	104149296	104149296	A	T	A>T	exonic	Ubqlnl	nonsynonymous SNV	NM_198624	exon1	c.T993A	p.N331K	0
NT2.5LM	SNV	chr7	107955564	107955564	G	A	G>A	exonic	Olfr474	nonsynonymous SNV	NM_146495	exon1	c.G922A	p.V308I	0
NT2.5LM	SNV	chr7	107967595	107967595	T	G	T>G	exonic	Olfr476	nonsynonymous SNV	NM_146924	exon1	c.T197G	p.L66R	0
NT2.5LM	SNV	chr7	126825031	126825031	C	G	C>G	exonic	Tlcd3b	nonsynonymous SNV	NM_029978	exon2	c.C146G	p.A49G	1
NT2.5LM	SNV	chr7	137313852	137313852	C	G	C>G	exonic	Ebf3	nonsynonymous SNV	NM_001113414	exon1	c.G62C	p.G21A	2
NT2.5LM	SNV	chr8	40286579	40286579	C	T	C>T	exonic	Fgf20	synonymous SNV	NM_030610	exon1	c.G129A	p.A43A	0
NT2.5LM	SNV	chr8	41309688	41309688	T	C	T>C	exonic	Pcm1	nonsynonymous SNV	NM_023662	exon24	c.T4268C	p.L1423S	0
NT2.5LM	SNV	chr8	43185456	43185456	C	G	C>G	exonic	Triml2	nonsynonymous SNV	NM_001381929	exon4	c.C460G	p.Q154E	1
NT2.5LM	SNV	chr8	48342694	48342694	T	C	T>C	exonic	Tenm3	synonymous SNV	NM_001145937	exon8	c.A1560G	p.R520R	1
NT2.5LM	SNV	chr8	55872524	55872524	C	G	C>G	exonic	Adam29	nonsynonymous SNV	NM_175939	exon2	c.G894C	p.R298S	0
NT2.5LM	SNV	chr8	67491496	67491496	T	G	T>G	exonic	Nat1	nonsynonymous SNV	NM_008673	exon1	c.T523G	p.F175V	0
NT2.5LM	SNV	chr8	70836343	70836343	G	C	G>C	exonic	Arrdc2	nonsynonymous SNV	NM_027560	exon7	c.C1047G	p.S349R	0
NT2.5LM	SNV	chr8	71611386	71611386	C	G	C>G	exonic	Colgalt1	nonsynonymous SNV	NM_001364443	exon1	c.C187G	p.P63A	1
NT2.5LM	SNV	chr8	81014188	81014188	A	C	A>C	exonic	Usp38	synonymous SNV	NM_027554	exon1	c.T249G	p.T83T	0
NT2.5LM	SNV	chr8	110583995	110583995	C	T	C>T	exonic	Hydin	synonymous SNV	NM_172916	exon73	c.C12322T	p.L4108L	0
NT2.5LM	SNV	chr8	111056609	111056609	G	T	G>T	exonic	Exosc6	nonsynonymous SNV	NM_028274	exon1	c.G239T	p.G80V	0
NT2.5LM	SNV	chr8	111890309	111890309	C	G	C>G	exonic	Chst5	synonymous SNV	NM_019950	exon2	c.G678C	p.L226L	0
NT2.5LM	SNV	chr8	123256833	123256833	C	T	C>T	exonic	Zfp276	nonsynonymous SNV	NM_020497	exon4	c.C974T	p.T325M	0
NT2.5LM	SNV	chr9	4309355	4309355	G	C	G>C	exonic	Aasdhppt	nonsynonymous SNV	NM_001326359	exon1	c.C82G	p.P28A	1
NT2.5LM	SNV	chr9	15992306	15992306	G	T	G>T	exonic	Fat3	synonymous SNV	NM_001080814	exon11	c.C8904A	p.P2968P	0
NT2.5LM	SNV	chr9	15998870	15998870	G	C	G>C	exonic	Fat3	nonsynonymous SNV	NM_001080814	exon10	c.C5847G	p.H1949Q	0
NT2.5LM	SNV	chr9	18595403	18595403	G	C	G>C	exonic	Muc16	synonymous SNV	NM_001378248	exon21	c.C20139G	p.V6713V	0
NT2.5LM	SNV	chr9	20260665	20260665	G	C	G>C	exonic	Olfr872	nonsynonymous SNV	NM_146560	exon2	c.G824C	p.G275A	0
NT2.5LM	SNV	chr9	44881227	44881227	G	A	G>A	exonic	Kmt2a	synonymous SNV	NM_001357549	exon1	c.C48T	p.T16T	0
NT2.5LM	SNV	chr9	53459753	53459753	A	C	A>C	exonic	Atm	nonsynonymous SNV	NM_007499	exon46	c.T6785G	p.V2262G	0
NT2.5LM	SNV	chr9	53552471	53552471	A	G	A>G	exonic	Npat	nonsynonymous SNV	NM_001081152	exon6	c.A553G	p.T185A	0
NT2.5LM	SNV	chr9	54331911	54331911	G	T	G>T	exonic	Gldn	nonsynonymous SNV	NM_177350	exon5	c.G576T	p.K192N	0
NT2.5LM	SNV	chr9	70580860	70580860	T	C	T>C	exonic	Sltm	nonsynonymous SNV	NM_001357911	exon13	c.T1495C	p.Y499H	2
NT2.5LM	SNV	chr9	108293977	108293977	G	A	G>A	exonic	Nicn1	nonsynonymous SNV	NM_001364505	exon3	c.G356A	p.R119Q	1
NT2.5LM	SNV	chr9	111333700	111333700	C	A	C>A	exonic	Trank1	nonsynonymous SNV	NM_001164659	exon2	c.C413A	p.T138N	0
NT2.5LM	SNV	chr10	5030386	5030386	G	T	G>T	exonic	Syne1	nonsynonymous SNV	NM_022027	exon16	c.C2599A	p.P867T	3
NT2.5LM	SNV	chr10	18531963	18531963	A	G	A>G	exonic	Nhsl1	nonsynonymous SNV	NM_173390	exon7	c.A4754G	p.Q1585R	1
NT2.5LM	SNV	chr10	27155464	27155464	C	G	C>G	exonic	Lama2	nonsynonymous SNV	NM_008481	exon32	c.G4597C	p.V1533L	0
NT2.5LM	SNV	chr10	39970552	39970552	C	G	C>G	exonic	Mfsd4b5	nonsynonymous SNV	NM_001113385	exon4	c.G1031C	p.G344A	0
NT2.5LM	SNV	chr10	40007388	40007388	A	G	A>G	exonic	Mfsd4b1	nonsynonymous SNV	NM_144821	exon2	c.T65C	p.L22P	0
NT2.5LM	SNV	chr10	75646948	75646948	G	T	G>T	exonic	Cabin1	nonsynonymous SNV	NM_172549	exon36	c.C6347A	p.T2116N	0
NT2.5LM	SNV	chr10	77259340	77259340	C	T	C>T	exonic	Pofut2	synonymous SNV	NM_030262	exon1	c.C18T	p.V6V	0
NT2.5LM	SNV	chr10	78071905	78071905	A	C	A>C	exonic	Icosl	nonsynonymous SNV	NM_015790	exon3	c.A298C	p.N100H	0
NT2.5LM	SNV	chr10	79481518	79481518	G	A	G>A	exonic	Vmn2r83	nonsynonymous SNV	NM_001104537	exon5	c.G1594A	p.V532I	0
NT2.5LM	DNP	chr10	80054994	80054995	GG	TA	GG>TA	exonic	Gpx4	unknown					0
NT2.5LM	SNV	chr10	86833978	86833978	G	A	G>A	exonic	Nt5dc3	nonsynonymous SNV	NM_175331	exon14	c.G1436A	p.R479Q	0
NT2.5LM	SNV	chr10	117278121	117278121	T	C	T>C	exonic	Lyz2	stoploss	NM_017372	exon4	c.A447G	p.X149W	0
NT2.5LM	SNV	chr10	117759200	117759200	C	T	C>T	exonic	Nup107	nonsynonymous SNV	NM_134010	exon24	c.G2237A	p.R746Q	0
NT2.5LM	SNV	chr10	128290704	128290704	T	C	T>C	exonic	Stat2	nonsynonymous SNV	NM_019963	exon23	c.T2297C	p.L766P	0
NT2.5LM	SNV	chr11	33479250	33479250	A	C	A>C	exonic	Ranbp17	nonsynonymous SNV	NM_001362875	exon10	c.T994G	p.F332V	1
NT2.5LM	SNV	chr11	49113284	49113284	C	A	C>A	exonic	Olfr1396	synonymous SNV	NM_146337	exon1	c.G441T	p.G147G	0
NT2.5LM	SNV	chr11	53422855	53422855	G	T	G>T	exonic	Leap2	stopgain	NM_153069	exon2	c.C89A	p.S30X	0
NT2.5LM	SNV	chr11	58684537	58684537	C	G	C>G	exonic	Olfr320	synonymous SNV	NM_207230	exon1	c.C663G	p.V221V	0
NT2.5LM	SNV	chr11	59742041	59742041	G	A	G>A	exonic	Mprip	synonymous SNV	NM_001368931	exon9	c.G1443A	p.L481L	2
NT2.5LM	SNV	chr11	62552220	62552220	C	T	C>T	exonic	Ubb	synonymous SNV	NM_001313984	exon2	c.C75T	p.N25N	1
NT2.5LM	SNV	chr11	65178543	65178543	G	T	G>T	exonic	Myocd	nonsynonymous SNV	NM_146386	exon13	c.C2710A	p.L904I	1
NT2.5LM	SNV	chr11	75469761	75469761	G	C	G>C	exonic	Tlcd2	nonsynonymous SNV	NM_027249	exon4	c.G629C	p.G210A	0
NT2.5LM	SNV	chr11	77515604	77515604	G	T	G>T	exonic	Abhd15	nonsynonymous SNV	NM_026185	exon1	c.G406T	p.A136S	0
NT2.5LM	SNV	chr11	77537954	77537954	A	G	A>G	exonic	Taok1	synonymous SNV	NM_144825	exon20	c.T2919C	p.A973A	2
NT2.5LM	SNV	chr11	86233141	86233141	G	A	G>A	exonic	Ints2	nonsynonymous SNV	NM_001363130	exon13	c.C1880T	p.A627V	2
NT2.5LM	SNV	chr11	87240658	87240658	A	G	A>G	exonic	Ppm1e	nonsynonymous SNV	NM_177167	exon4	c.T908C	p.L303P	0
NT2.5LM	SNV	chr11	98422060	98422060	T	C	T>C	exonic	Erbb2	synonymous SNV	NM_001003817	exon4	c.T448C	p.L150L	0
NT2.5LM	SNV	chr11	98434511	98434511	G	A	G>A	exonic	Erbb2	synonymous SNV	NM_001003817	exon22	c.G2664A	p.K888K	0
NT2.5LM	SNV	chr11	98436593	98436593	T	G	T>G	exonic	Erbb2	synonymous SNV	NM_001003817	exon27	c.T3696G	p.G1232G	0
NT2.5LM	SNV	chr11	98436607	98436607	C	A	C>A	exonic	Erbb2	nonsynonymous SNV	NM_001003817	exon27	c.C3710A	p.T1237N	0
NT2.5LM	SNV	chr11	98649213	98649213	G	T	G>T	exonic	Gsdma2	startloss	NM_001363220	exon2	c.G160T	p.V54L	2
NT2.5LM	SNV	chr11	99780425	99780425	G	A	G>A	exonic	Krtap4-8	synonymous SNV	NM_001085547	exon1	c.C219T	p.S73S	0
NT2.5LM	SNV	chr11	100102857	100102857	C	T	C>T	exonic	Krt36	nonsynonymous SNV	NM_001174099	exon6	c.G1154A	p.R385Q	0
NT2.5LM	SNV	chr11	102480846	102480846	T	C	T>C	exonic	Gpatch8	nonsynonymous SNV	NM_001159492	exon8	c.A1865G	p.E622G	0
NT2.5LM	SNV	chr11	103028628	103028628	G	A	G>A	exonic	Nmt1	nonsynonymous SNV	NM_008707	exon1	c.G57A	p.M19I	0
NT2.5LM	SNV	chr11	103604562	103604562	T	A	T>A	exonic	Gm884	synonymous SNV	NM_001033434	exon4	c.A1902T	p.I634I	0
NT2.5LM	SNV	chr11	106339174	106339174	C	T	C>T	exonic	Scn4a	nonsynonymous SNV	NM_133199	exon11	c.G1807A	p.V603M	0
NT2.5LM	SNV	chr11	107175701	107175701	G	A	G>A	exonic	Nol11	nonsynonymous SNV	NM_001363078	exon10	c.C1055T	p.A352V	2
NT2.5LM	SNV	chr11	110145597	110145597	C	G	C>G	exonic	Abca9	nonsynonymous SNV	NM_147220	exon13	c.G1685C	p.G562A	0
NT2.5LM	SNV	chr11	116223680	116223680	C	T	C>T	exonic	Evpl	synonymous SNV	NM_025276	exon22	c.G3183A	p.L1061L	0
NT2.5LM	SNV	chr11	116478557	116478557	A	T	A>T	exonic	Prpsap1	nonsynonymous SNV	NM_026364	exon5	c.T547A	p.S183T	0
NT2.5LM	SNV	chr11	117855244	117855244	A	C	A>C	exonic	Birc5	nonsynonymous SNV	NM_009689	exon4	c.A359C	p.K120T	0
NT2.5LM	SNV	chr11	120629319	120629319	T	G	T>G	exonic	Mafg	nonsynonymous SNV	NM_010756	exon3	c.A454C	p.T152P	0
NT2.5LV	SNV	chr1	20520293	20520293	G	C	G>C	exonic	Pkhd1	nonsynonymous SNV	NM_153179	exon33	c.C5229G	p.C1743W	0
NT2.5LV	SNV	chr1	20523813	20523813	C	A	C>A	exonic	Pkhd1	nonsynonymous SNV	NM_153179	exon32	c.G4075T	p.V1359F	0
NT2.5LV	SNV	chr1	24307662	24307662	C	G	C>G	exonic	Col19a1	nonsynonymous SNV	NM_007733	exon35	c.G2312C	p.G771A	0
NT2.5LV	SNV	chr1	24728559	24728559	C	T	C>T	exonic	Lmbrd1	nonsynonymous SNV	NM_001310483	exon8	c.C431T	p.S144L	1
NT2.5LV	SNV	chr1	30821140	30821140	C	A	C>A	exonic	Phf3	nonsynonymous SNV	NM_001081080	exon5	c.G2608T	p.A870S	0
NT2.5LV	SNV	chr1	36549898	36549898	G	C	G>C	exonic	Sema4c	nonsynonymous SNV	NM_001126047	exon15	c.C2146G	p.P716A	2
NT2.5LV	SNV	chr1	36550526	36550526	T	G	T>G	exonic	Sema4c	nonsynonymous SNV	NM_001126047	exon14	c.A1655C	p.N552T	2
NT2.5LV	SNV	chr1	44174246	44174246	C	A	C>A	exonic	Ercc5	nonsynonymous SNV	NM_011729	exon11	c.C2401A	p.Q801K	0
NT2.5LV	SNV	chr1	45329068	45329068	C	A	C>A	exonic	Col3a1	nonsynonymous SNV	NM_009930	exon13	c.C910A	p.P304T	0
NT2.5LV	SNV	chr1	45912296	45912296	C	T	C>T	exonic	Slc40a1	nonsynonymous SNV	NM_016917	exon6	c.G700A	p.A234T	0
NT2.5LV	SNV	chr1	46224714	46224714	C	A	C>A	exonic	Dnah7b	nonsynonymous SNV	NM_001368717	exon38	c.C6223A	p.L2075I	0
NT2.5LV	SNV	chr1	75258557	75258557	G	A	G>A	exonic	Ptprn	nonsynonymous SNV	NM_001359281	exon5	c.C188T	p.A63V	1
NT2.5LV	SNV	chr1	75427733	75427733	C	A	C>A	exonic	Speg	nonsynonymous SNV	NM_001085370	exon33	c.C6076A	p.P2026T	1
NT2.5LV	SNV	chr1	75484440	75484440	G	C	G>C	exonic	Tmem198	nonsynonymous SNV	NM_177056	exon4	c.G808C	p.E270Q	0
NT2.5LV	Indel	chr1	75484445	75484445	-	ACGGCATA	->ACGGCATA	exonic	Tmem198	frameshift insertion	NM_177056	exon4	c.813_814insACGGCATA	p.R272Tfs*62	0
NT2.5LV	SNV	chr1	83159804	83159804	G	A	G>A	exonic	Daw1	synonymous SNV	NM_001372243	exon1	c.G6A	p.K2K	3
NT2.5LV	SNV	chr1	88232257	88232257	G	T	G>T	exonic	Mroh2a	nonsynonymous SNV	NM_001281466	exon6	c.G570T	p.M190I	0
NT2.5LV	SNV	chr1	88266121	88266121	G	A	G>A	exonic	A730008H23Rik;Hjurp	nonsynonymous SNV	NM_172505	exon5	c.C836T	p.S279F	1
NT2.5LV	SNV	chr1	88266452	88266452	C	T	C>T	exonic	A730008H23Rik;Hjurp	nonsynonymous SNV	NM_172505	exon5	c.G505A	p.D169N	1
NT2.5LV	SNV	chr1	88266561	88266561	A	G	A>G	exonic	A730008H23Rik;Hjurp	synonymous SNV	NM_172505	exon5	c.T396C	p.D132D	1
NT2.5LV	SNV	chr1	88266616	88266616	T	C	T>C	exonic	A730008H23Rik;Hjurp	nonsynonymous SNV	NM_172505	exon5	c.A341G	p.E114G	1
NT2.5LV	SNV	chr1	97777332	97777332	A	C	A>C	exonic	Gin1	nonsynonymous SNV	NM_001310773	exon3	c.A146C	p.K49T	1
NT2.5LV	SNV	chr1	150105457	150105457	A	T	A>T	exonic	Ptgs2	nonsynonymous SNV	NM_011198	exon10	c.A1490T	p.K497I	0
NT2.5LV	SNV	chr1	150454857	150454857	A	C	A>C	exonic	Prg4	synonymous SNV	NM_021400	exon7	c.T2064G	p.T688T	0
NT2.5LV	SNV	chr1	150454860	150454860	T	G	T>G	exonic	Prg4	synonymous SNV	NM_021400	exon7	c.A2061C	p.T687T	0
NT2.5LV	SNV	chr1	155933345	155933345	G	C	G>C	exonic	Cep350	nonsynonymous SNV	NM_001039184	exon10	c.C1484G	p.T495S	0
NT2.5LV	SNV	chr1	161101585	161101585	G	C	G>C	exonic	Klhl20	nonsynonymous SNV	NM_001039482	exon7	c.C1002G	p.D334E	0
NT2.5LV	SNV	chr1	166307821	166307821	G	T	G>T	exonic	Ildr2	nonsynonymous SNV	NM_001357429	exon5	c.G760T	p.D254Y	5
NT2.5LV	SNV	chr1	173642599	173642599	C	A	C>A	exonic	Ifi209	nonsynonymous SNV	NM_175026	exon5	c.C752A	p.T251K	0
NT2.5LV	SNV	chr1	173642602	173642602	A	G	A>G	exonic	Ifi209	nonsynonymous SNV	NM_175026	exon5	c.A755G	p.E252G	0
NT2.5LV	SNV	chr1	174117107	174117107	A	C	A>C	exonic	Olfr231	nonsynonymous SNV	NM_001005520	exon1	c.T908G	p.V303G	0
NT2.5LV	SNV	chr1	181922441	181922441	G	C	G>C	exonic	Enah	nonsynonymous SNV	NM_001083120	exon6	c.C775G	p.P259A	2
NT2.5LV	Indel	chr1	185373028	185373028	T	-	T>-	exonic	Eprs	frameshift deletion	NM_001357474	exon5	c.499delT	p.W167Gfs*32	1
NT2.5LV	SNV	chr1	188444561	188444561	T	C	T>C	exonic	Ush2a	synonymous SNV	NM_021408	exon17	c.T3921C	p.S1307S	0
NT2.5LV	SNV	chr2	13334788	13334788	A	G	A>G	exonic	Cubn	synonymous SNV	NM_001081084	exon45	c.T6987C	p.A2329A	0
NT2.5LV	SNV	chr2	20849575	20849575	T	A	T>A	exonic	Arhgap21	nonsynonymous SNV	NM_001081364	exon24	c.A4975T	p.S1659C	1
NT2.5LV	SNV	chr2	25273280	25273280	G	T	G>T	exonic	Anapc2	synonymous SNV	NM_175300	exon2	c.G528T	p.L176L	0
NT2.5LV	SNV	chr2	29176882	29176882	C	A	C>A	exonic	Setx	nonsynonymous SNV	NM_198033	exon24	c.C7034A	p.A2345E	0
NT2.5LV	SNV	chr2	32230733	32230733	C	T	C>T	exonic	Prrc2b	synonymous SNV	NM_001159634	exon32	c.C6684T	p.S2228S	0
NT2.5LV	SNV	chr2	35100635	35100635	G	A	G>A	exonic	AI182371	stopgain	NM_001243102	exon1	c.C19T	p.Q7X	5
NT2.5LV	SNV	chr2	35303232	35303232	C	T	C>T	exonic	Gsn	nonsynonymous SNV	NM_001206368	exon13	c.C1652T	p.A551V	6
NT2.5LV	SNV	chr2	35321569	35321569	C	G	C>G	exonic	Stom	nonsynonymous SNV	NM_013515	exon5	c.G439C	p.A147P	0
NT2.5LV	Indel	chr2	41268392	41268393	TG	-	TG>-	exonic	Lrp1b	frameshift deletion	NM_053011	exon31	c.5153_5154del	p.A1718Efs*6	0
NT2.5LV	SNV	chr2	69458418	69458418	G	A	G>A	exonic	Lrp2	synonymous SNV	NM_001081088	exon57	c.C11103T	p.C3701C	0
NT2.5LV	SNV	chr2	69550930	69550930	G	T	G>T	exonic	Lrp2	synonymous SNV	NM_001081088	exon3	c.C210A	p.G70G	0
NT2.5LV	SNV	chr2	76739025	76739025	C	A	C>A	exonic	Ttn	nonsynonymous SNV	NM_028004	exon154	c.G56542T	p.V18848F	2
NT2.5LV	SNV	chr2	76772486	76772486	G	A	G>A	exonic	Ttn	nonsynonymous SNV	NM_028004	exon123	c.C30410T	p.A10137V	2
NT2.5LV	SNV	chr2	76790818	76790818	G	C	G>C	exonic	Ttn	nonsynonymous SNV	NM_028004	exon91	c.C22192G	p.P7398A	2
NT2.5LV	SNV	chr2	76891324	76891324	C	T	C>T	exonic	Ttn	nonsynonymous SNV	NM_011652	exon69	c.G17353A	p.V5785I	1
NT2.5LV	SNV	chr2	76896935	76896935	C	T	C>T	exonic	Ttn	nonsynonymous SNV	NM_011652	exon60	c.G14639A	p.R4880K	1
NT2.5LV	SNV	chr2	82984522	82984522	C	A	C>A	exonic	Fsip2	nonsynonymous SNV	NM_001370266	exon17	c.C10592A	p.S3531Y	0
NT2.5LV	SNV	chr2	85648051	85648051	T	G	T>G	exonic	Olfr1002	nonsynonymous SNV	NM_146573	exon1	c.A269C	p.K90T	0
NT2.5LV	SNV	chr2	87192172	87192172	G	T	G>T	exonic	Olfr1112	nonsynonymous SNV	NM_146661	exon1	c.G484T	p.V162F	0
NT2.5LV	SNV	chr2	87949311	87949311	A	C	A>C	exonic	Olfr1156	synonymous SNV	NM_146817	exon1	c.T921G	p.S307S	0
NT2.5LV	SNV	chr2	88224250	88224250	A	C	A>C	exonic	Olfr1170	nonsynonymous SNV	NM_146532	exon1	c.T781G	p.Y261D	0
NT2.5LV	SNV	chr2	88339900	88339900	C	A	C>A	exonic	Olfr1176	nonsynonymous SNV	NM_146771	exon1	c.C334A	p.Q112K	0
NT2.5LV	SNV	chr2	89097603	89097603	C	A	C>A	exonic	Olfr1220	nonsynonymous SNV	NM_146900	exon1	c.G323T	p.G108V	0
NT2.5LV	SNV	chr2	89418223	89418223	G	T	G>T	exonic	Olfr1239	stopgain	NM_146970	exon1	c.C189A	p.Y63X	0
NT2.5LV	SNV	chr2	91772998	91772998	T	G	T>G	exonic	Ambra1	nonsynonymous SNV	NM_172669	exon7	c.T1326G	p.S442R	1
NT2.5LV	SNV	chr2	110265488	110265488	C	A	C>A	exonic	Bbox1	nonsynonymous SNV	NM_130452	exon7	c.G1130T	p.R377L	0
NT2.5LV	SNV	chr2	111257163	111257163	G	A	G>A	exonic	Olfr1276	nonsynonymous SNV	NM_146395	exon1	c.G47A	p.G16E	0
NT2.5LV	SNV	chr2	116063400	116063400	G	C	G>C	exonic	Meis2	stopgain	NM_001136072	exon2	c.C33G	p.Y11X	11
NT2.5LV	SNV	chr2	120713794	120713794	G	T	G>T	exonic	Stard9	nonsynonymous SNV	NM_001370940	exon31	c.G13465T	p.D4489Y	0
NT2.5LV	SNV	chr2	121098975	121098975	T	A	T>A	exonic	Tgm7	unknown					0
NT2.5LV	SNV	chr2	121303480	121303480	G	C	G>C	exonic	Map1a	nonsynonymous SNV	NM_001173506	exon4	c.G4062C	p.Q1354H	1
NT2.5LV	SNV	chr2	131308508	131308508	A	G	A>G	exonic	Rnf24	synonymous SNV	NM_178607	exon3	c.T153C	p.H51H	0
NT2.5LV	SNV	chr2	143964835	143964835	G	A	G>A	exonic	Rrbp1	synonymous SNV	NM_024281	exon8	c.C2862T	p.C954C	0
NT2.5LV	SNV	chr2	151504162	151504162	G	T	G>T	exonic	Nsfl1c	nonsynonymous SNV	NM_001291074	exon5	c.G496T	p.A166S	1
NT2.5LV	Indel	chr2	154627945	154627989	CCACCCCCTCCGCCTCTCCCCCCACCCCCCCAGCCTCCTCCTCCC	-	CCACCCCCTCCGCCTCTCCCCCCACCCCCCCAGCCTCCTCCTCCC>-	exonic	Zfp341	nonframeshift deletion	NM_199304	exon5	c.547_591del	p.P185_P199del	0
NT2.5LV	SNV	chr2	164892201	164892201	C	T	C>T	exonic	Zfp335	nonsynonymous SNV	NM_199027	exon28	c.G3977A	p.G1326D	0
NT2.5LV	SNV	chr2	174299144	174299144	G	C	G>C	exonic	Gnas	nonsynonymous SNV	NM_001077507	exon1	c.G1283C	p.G428A	4
NT2.5LV	Indel	chr2	174299153	174299153	-	CATAC	->CATAC	exonic	Gnas	frameshift insertion	NM_001077507	exon1	c.1292_1293insCATAC	p.T432Ifs*356	4
NT2.5LV	SNV	chr2	178283020	178283020	G	A	G>A	exonic	Phactr3	synonymous SNV	NM_001007154	exon6	c.G639A	p.A213A	4
NT2.5LV	SNV	chr2	180911360	180911360	C	T	C>T	exonic	Ythdf1	nonsynonymous SNV	NM_173761	exon4	c.G980A	p.R327H	0
NT2.5LV	Indel	chr3	38982256	38982256	G	-	G>-	exonic	Fat4	stopgain	NM_183221	exon9	c.10056delG	p.M3353*	0
NT2.5LV	SNV	chr3	38982258	38982258	T	A	T>A	exonic	Fat4	nonsynonymous SNV	NM_183221	exon9	c.T10058A	p.M3353K	0
NT2.5LV	SNV	chr3	68927772	68927772	C	T	C>T	exonic	Ift80	synonymous SNV	NM_026641	exon13	c.G1335A	p.A445A	0
NT2.5LV	SNV	chr3	82038060	82038060	A	G	A>G	exonic	Gucy1b1	nonsynonymous SNV	NM_001161796	exon10	c.T1270C	p.F424L	1
NT2.5LV	SNV	chr3	89367165	89367165	G	T	G>T	exonic	Dcst2	nonsynonymous SNV	NM_001370853	exon5	c.G711T	p.Q237H	0
NT2.5LV	SNV	chr3	90038969	90038969	C	A	C>A	exonic	Ubap2l	nonsynonymous SNV	NM_001165983	exon5	c.G327T	p.K109N	8
NT2.5LV	SNV	chr3	96145093	96145093	G	T	G>T	exonic	Otud7b	stopgain	NM_001025614	exon6	c.G730T	p.E244X	1
NT2.5LV	SNV	chr3	98104353	98104353	C	G	C>G	exonic	Notch2	nonsynonymous SNV	NM_010928	exon11	c.C1686G	p.F562L	0
NT2.5LV	SNV	chr3	100100323	100100323	C	A	C>A	exonic	Spag17	nonsynonymous SNV	NM_028892	exon41	c.C5808A	p.S1936R	0
NT2.5LV	SNV	chr3	107495807	107495807	G	T	G>T	exonic	Slc6a17	synonymous SNV	NM_001293689	exon3	c.C303A	p.P101P	1
NT2.5LV	SNV	chr3	108960265	108960265	G	A	G>A	exonic	Henmt1	nonsynonymous SNV	NM_001078646	exon8	c.G1115A	p.C372Y	1
NT2.5LV	SNV	chr3	109166426	109166426	C	G	C>G	exonic	Slc25a24	nonsynonymous SNV	NM_172685	exon10	c.C1344G	p.N448K	0
NT2.5LV	SNV	chr3	130630520	130630520	C	T	C>T	exonic	Etnppl	nonsynonymous SNV	NM_027907	exon9	c.C940T	p.P314S	1
NT2.5LV	SNV	chr3	144201866	144201866	G	A	G>A	exonic	Lmo4	synonymous SNV	NM_001161770	exon1	c.C183T	p.G61G	2
NT2.5LV	SNV	chr4	11785132	11785132	T	A	T>A	exonic	Cdh17	nonsynonymous SNV	NM_019753	exon9	c.T923A	p.F308Y	0
NT2.5LV	SNV	chr4	113626618	113626618	C	T	C>T	exonic	Skint5	nonsynonymous SNV	NM_001167876	exon37	c.G2774A	p.R925K	1
NT2.5LV	SNV	chr4	123297953	123297953	C	A	C>A	exonic	Pabpc4	nonsynonymous SNV	NM_001356377	exon13	c.C1768A	p.L590M	2
NT2.5LV	SNV	chr4	136995413	136995413	G	A	G>A	exonic	Zbtb40	stopgain	NM_198248	exon12	c.C2353T	p.Q785X	0
NT2.5LV	Indel	chr4	138240661	138240663	GAC	-	GAC>-	exonic	Hp1bp3	nonframeshift deletion	NM_001122896	exon11	c.1180_1182del	p.D395del	8
NT2.5LV	Indel	chr4	138240667	138240669	GAA	-	GAA>-	exonic	Hp1bp3	nonframeshift deletion	NM_001122896	exon11	c.1186_1188del	p.E396del	8
NT2.5LV	SNV	chr4	146124343	146124343	A	C	A>C	exonic	Zfp987	nonsynonymous SNV	NM_001037926	exon4	c.A344C	p.N115T	0
NT2.5LV	Indel	chr4	148671394	148671395	GG	-	GG>-	exonic	Gm572	frameshift deletion	NM_001085505	exon11	c.1166_1167del	p.V393Gfs*42	0
NT2.5LV	SNV	chr4	153432839	153432839	C	T	C>T	exonic	Ajap1	nonsynonymous SNV	NM_001099299	exon2	c.G44A	p.R15H	0
NT2.5LV	SNV	chr4	156240649	156240649	C	T	C>T	exonic	Noc2l	nonsynonymous SNV	NM_001369270	exon9	c.C479T	p.A160V	1
NT2.5LV	SNV	chr5	6770073	6770073	C	G	C>G	exonic	Zfp804b	nonsynonymous SNV	NM_001163223	exon4	c.G2989C	p.D997H	0
NT2.5LV	SNV	chr5	14677416	14677416	C	A	C>A	exonic	Pclo	nonsynonymous SNV	NM_001110796	exon5	c.C6287A	p.S2096Y	1
NT2.5LV	SNV	chr5	14714115	14714115	T	C	T>C	exonic	Pclo	nonsynonymous SNV	NM_001110796	exon7	c.T12601C	p.S4201P	1
NT2.5LV	DNP	chr5	34551647	34551648	CG	GC	CG>GC	exonic	Sh3bp2	nonframeshift substitution	NM_001145858	exon2	c.215_216delinsGC	p.A72G	2
NT2.5LV	Indel	chr5	37370823	37370823	-	CGGCATAC	->CGGCATAC	exonic	Evc2	frameshift insertion	NM_145920	exon8	c.1175_1176insCGGCATAC	p.E392Dfs*6	0
NT2.5LV	SNV	chr5	39614561	39614561	G	T	G>T	exonic	Hs3st1	nonsynonymous SNV	NM_010474	exon2	c.C738A	p.N246K	0
NT2.5LV	SNV	chr5	52741819	52741819	C	A	C>A	exonic	Pi4k2b	nonsynonymous SNV	NM_025951	exon1	c.C101A	p.A34E	1
NT2.5LV	SNV	chr5	69110368	69110368	C	G	C>G	exonic	Kctd8	nonsynonymous SNV	NM_175519	exon2	c.G1398C	p.W466C	0
NT2.5LV	SNV	chr5	74585062	74585062	A	G	A>G	exonic	Fip1l1	synonymous SNV	NM_024183	exon12	c.A1011G	p.V337V	3
NT2.5LV	SNV	chr5	111454711	111454711	C	T	C>T	exonic	Mn1	nonsynonymous SNV	NM_001081235	exon3	c.C3814T	p.R1272C	0
NT2.5LV	SNV	chr5	112354995	112354995	T	C	T>C	exonic	Gm6583	nonsynonymous SNV	NM_001039228	exon1	c.A842G	p.Q281R	0
NT2.5LV	SNV	chr5	117695459	117695459	C	A	C>A	exonic	Ksr2	nonsynonymous SNV	NM_001312914	exon10	c.C1606A	p.P536T	0
NT2.5LV	SNV	chr5	121315035	121315035	C	T	C>T	exonic	Hectd4	nonsynonymous SNV	NM_181421	exon36	c.C5615T	p.P1872L	0
NT2.5LV	SNV	chr5	123531175	123531175	G	A	G>A	exonic	Vps33a	synonymous SNV	NM_001359513	exon12	c.C1524T	p.G508G	1
NT2.5LV	SNV	chr5	123558762	123558762	C	A	C>A	exonic	Vps33a	nonsynonymous SNV	NM_001359513	exon7	c.G827T	p.G276V	1
NT2.5LV	SNV	chr5	123700654	123700654	G	A	G>A	exonic	Zcchc8	nonsynonymous SNV	NM_027494	exon14	c.C1820T	p.A607V	0
NT2.5LV	SNV	chr5	124283641	124283641	G	A	G>A	exonic	Mphosph9	nonsynonymous SNV	NM_001081323	exon14	c.C2236T	p.R746W	1
NT2.5LV	SNV	chr5	140524637	140524637	G	C	G>C	exonic	Chst12	nonsynonymous SNV	NM_021528	exon2	c.G1018C	p.D340H	0
NT2.5LV	Indel	chr5	144997059	144997059	G	-	G>-	exonic	Kpna7	frameshift deletion	NM_001347531	exon7	c.886delC	p.H296Ifs*4	1
NT2.5LV	SNV	chr5	147274564	147274564	T	G	T>G	exonic	Pdx1	synonymous SNV	NM_008814	exon2	c.T594G	p.R198R	0
NT2.5LV	SNV	chr5	147430912	147430912	C	A	C>A	exonic	Pan3	synonymous SNV	NM_028291	exon1	c.C333A	p.G111G	0
NT2.5LV	SNV	chr6	34857697	34857697	C	A	C>A	exonic	Agbl3	nonsynonymous SNV	NM_001289657	exon19	c.C2086A	p.Q696K	2
NT2.5LV	SNV	chr6	85484212	85484212	G	A	G>A	exonic	Fbxo41	synonymous SNV	NM_001289674	exon2	c.C513T	p.P171P	2
NT2.5LV	SNV	chr6	85628114	85628114	G	T	G>T	exonic	Alms1	nonsynonymous SNV	NM_145223	exon10	c.G5338T	p.G1780C	0
NT2.5LV	SNV	chr6	91031691	91031691	A	G	A>G	exonic	Nup210	nonsynonymous SNV	NM_018815	exon29	c.T3866C	p.L1289P	0
NT2.5LV	SNV	chr6	97112160	97112160	G	C	G>C	exonic	Eogt	nonsynonymous SNV	NM_175313	exon18	c.C1484G	p.S495C	0
NT2.5LV	SNV	chr6	121031044	121031044	C	T	C>T	exonic	Mical3	nonsynonymous SNV	NM_001270475	exon10	c.G1402A	p.V468I	1
NT2.5LV	SNV	chr6	127657924	127657924	G	T	G>T	exonic	Cracr2a	nonsynonymous SNV	NM_001368877	exon16	c.G1917T	p.E639D	0
NT2.5LV	SNV	chr6	129467534	129467534	C	A	C>A	exonic	Clec7a	nonsynonymous SNV	NM_001309637	exon3	c.G337T	p.D113Y	0
NT2.5LV	SNV	chr6	140583915	140583915	G	C	G>C	exonic	Plekha5	nonsynonymous SNV	NM_144920	exon26	c.G3102C	p.L1034F	0
NT2.5LV	SNV	chr6	148809915	148809915	A	T	A>T	exonic	Ipo8	nonsynonymous SNV	NM_001081113	exon8	c.T874A	p.F292I	0
NT2.5LV	SNV	chr7	3716812	3716812	A	T	A>T	exonic	Pirb	nonsynonymous SNV	NM_001357394	exon7	c.T1334A	p.F445Y	1
NT2.5LV	SNV	chr7	4707906	4707906	G	A	G>A	exonic	Brsk1	nonsynonymous SNV	NM_001003920	exon15	c.G1726A	p.A576T	0
NT2.5LV	SNV	chr7	4794489	4794489	C	G	C>G	exonic	Rpl28	synonymous SNV	NM_009081	exon5	c.C396G	p.R132R	0
NT2.5LV	SNV	chr7	5301004	5301004	C	A	C>A	exonic	Nlrp2	nonsynonymous SNV	NM_177690	exon11	c.G2906T	p.S969I	0
NT2.5LV	SNV	chr7	9976248	9976248	A	G	A>G	exonic	Vmn2r49	synonymous SNV	NM_001105156	exon6	c.T2556C	p.F852F	0
NT2.5LV	SNV	chr7	16134306	16134306	C	A	C>A	exonic	Slc8a2	nonsynonymous SNV	NM_001347561	exon2	c.C462A	p.N154K	1
NT2.5LV	SNV	chr7	21012226	21012226	G	T	G>T	exonic	Vmn1r119	nonsynonymous SNV	NM_001166708	exon1	c.C230A	p.A77D	0
NT2.5LV	SNV	chr7	24611414	24611414	C	T	C>T	exonic	Phldb3	stopgain	NM_001102613	exon1	c.C70T	p.Q24X	0
NT2.5LV	SNV	chr7	25226299	25226299	C	T	C>T	exonic	Zfp526	nonsynonymous SNV	NM_175436	exon3	c.C1982T	p.A661V	0
NT2.5LV	SNV	chr7	28181616	28181616	G	T	G>T	exonic	Dyrk1b	nonsynonymous SNV	NM_001037957	exon2	c.G7T	p.V3F	2
NT2.5LV	SNV	chr7	29053064	29053064	G	A	G>A	exonic	Ryr1	stopgain	NM_009109	exon73	c.C10825T	p.Q3609X	0
NT2.5LV	SNV	chr7	29244120	29244120	C	A	C>A	exonic	Yif1b	nonsynonymous SNV	NM_001110201	exon2	c.C97A	p.Q33K	4
NT2.5LV	SNV	chr7	29339164	29339164	T	C	T>C	exonic	Sipa1l3	nonsynonymous SNV	NM_001081028	exon17	c.A4204G	p.R1402G	0
NT2.5LV	SNV	chr7	35043729	35043729	C	T	C>T	exonic	Pepd	nonsynonymous SNV	NM_008820	exon14	c.C1192T	p.R398C	0
NT2.5LV	SNV	chr7	45286996	45286996	G	T	G>T	exonic	Slc6a21	nonsynonymous SNV	NM_001033176	exon3	c.G397T	p.G133C	0
NT2.5LV	SNV	chr7	45524074	45524074	G	C	G>C	exonic	Ppp1r15a	nonsynonymous SNV	NM_008654	exon2	c.C1309G	p.P437A	0
NT2.5LV	SNV	chr7	45524084	45524084	T	G	T>G	exonic	Ppp1r15a	synonymous SNV	NM_008654	exon2	c.A1299C	p.P433P	0
NT2.5LV	SNV	chr7	45999092	45999092	C	T	C>T	exonic	Abcc6	nonsynonymous SNV	NM_018795	exon16	c.G1975A	p.V659I	0
NT2.5LV	SNV	chr7	56293766	56293766	C	A	C>A	exonic	Oca2	nonsynonymous SNV	NM_021879	exon7	c.C686A	p.A229E	0
NT2.5LV	SNV	chr7	68195621	68195621	A	G	A>G	exonic	Igf1r	nonsynonymous SNV	NM_010513	exon13	c.A2657G	p.Y886C	0
NT2.5LV	SNV	chr7	79089619	79089619	G	T	G>T	exonic	Acan	synonymous SNV	NM_001361500	exon6	c.G774T	p.A258A	1
NT2.5LV	SNV	chr7	85410258	85410258	T	C	T>C	exonic	Vmn2r69	nonsynonymous SNV	NM_001105182	exon4	c.A1442G	p.E481G	0
NT2.5LV	Indel	chr7	85410261	85410261	-	AA	->AA	exonic	Vmn2r69	frameshift insertion	NM_001105182	exon4	c.1438_1439insTT	p.S480Ffs*17	0
NT2.5LV	SNV	chr7	85559337	85559337	G	T	G>T	exonic	Vmn2r70	nonsynonymous SNV	NM_001384914	exon6	c.C1922A	p.T641N	0
NT2.5LV	SNV	chr7	104149296	104149296	A	T	A>T	exonic	Ubqlnl	nonsynonymous SNV	NM_198624	exon1	c.T993A	p.N331K	0
NT2.5LV	SNV	chr7	107967595	107967595	T	G	T>G	exonic	Olfr476	nonsynonymous SNV	NM_146924	exon1	c.T197G	p.L66R	0
NT2.5LV	SNV	chr7	141102089	141102089	G	A	G>A	exonic	Ano9	nonsynonymous SNV	NM_178381	exon23	c.C2146T	p.P716S	0
NT2.5LV	SNV	chr8	43185456	43185456	C	G	C>G	exonic	Triml2	nonsynonymous SNV	NM_001381929	exon4	c.C460G	p.Q154E	1
NT2.5LV	SNV	chr8	48342694	48342694	T	C	T>C	exonic	Tenm3	synonymous SNV	NM_001145937	exon8	c.A1560G	p.R520R	1
NT2.5LV	SNV	chr8	55872524	55872524	C	G	C>G	exonic	Adam29	nonsynonymous SNV	NM_175939	exon2	c.G894C	p.R298S	0
NT2.5LV	SNV	chr8	67491496	67491496	T	G	T>G	exonic	Nat1	nonsynonymous SNV	NM_008673	exon1	c.T523G	p.F175V	0
NT2.5LV	SNV	chr8	70836343	70836343	G	C	G>C	exonic	Arrdc2	nonsynonymous SNV	NM_027560	exon7	c.C1047G	p.S349R	0
NT2.5LV	SNV	chr8	81014188	81014188	A	C	A>C	exonic	Usp38	synonymous SNV	NM_027554	exon1	c.T249G	p.T83T	0
NT2.5LV	SNV	chr8	105141960	105141960	A	G	A>G	exonic	Ces4a	nonsynonymous SNV	NM_146213	exon3	c.A305G	p.Q102R	0
NT2.5LV	SNV	chr8	111056609	111056609	G	T	G>T	exonic	Exosc6	nonsynonymous SNV	NM_028274	exon1	c.G239T	p.G80V	0
NT2.5LV	SNV	chr8	111997614	111997614	G	T	G>T	exonic	Kars	synonymous SNV	NM_053092	exon11	c.C1380A	p.I460I	4
NT2.5LV	SNV	chr8	120028802	120028802	A	G	A>G	exonic	Crispld2	nonsynonymous SNV	NM_001310635	exon9	c.A914G	p.Q305R	1
NT2.5LV	SNV	chr9	4309355	4309355	G	C	G>C	exonic	Aasdhppt	nonsynonymous SNV	NM_001326359	exon1	c.C82G	p.P28A	1
NT2.5LV	SNV	chr9	15992306	15992306	G	T	G>T	exonic	Fat3	synonymous SNV	NM_001080814	exon11	c.C8904A	p.P2968P	0
NT2.5LV	SNV	chr9	15998870	15998870	G	C	G>C	exonic	Fat3	nonsynonymous SNV	NM_001080814	exon10	c.C5847G	p.H1949Q	0
NT2.5LV	SNV	chr9	18595403	18595403	G	C	G>C	exonic	Muc16	synonymous SNV	NM_001378248	exon21	c.C20139G	p.V6713V	0
NT2.5LV	SNV	chr9	20260665	20260665	G	C	G>C	exonic	Olfr872	nonsynonymous SNV	NM_146560	exon2	c.G824C	p.G275A	0
NT2.5LV	SNV	chr9	38180590	38180590	T	C	T>C	exonic	Olfr891	nonsynonymous SNV	NM_146478	exon1	c.A232G	p.T78A	0
NT2.5LV	SNV	chr9	44881227	44881227	G	A	G>A	exonic	Kmt2a	synonymous SNV	NM_001357549	exon1	c.C48T	p.T16T	0
NT2.5LV	SNV	chr9	53459753	53459753	A	C	A>C	exonic	Atm	nonsynonymous SNV	NM_007499	exon46	c.T6785G	p.V2262G	0
NT2.5LV	SNV	chr9	53552471	53552471	A	G	A>G	exonic	Npat	nonsynonymous SNV	NM_001081152	exon6	c.A553G	p.T185A	0
NT2.5LV	SNV	chr9	54331911	54331911	G	T	G>T	exonic	Gldn	nonsynonymous SNV	NM_177350	exon5	c.G576T	p.K192N	0
NT2.5LV	SNV	chr9	65838979	65838979	T	A	T>A	exonic	Trip4	nonsynonymous SNV	NM_001357872	exon13	c.A1634T	p.Q545L	1
NT2.5LV	SNV	chr9	70034675	70034675	G	A	G>A	exonic	Gcnt3	stopgain	NM_028087	exon3	c.C610T	p.Q204X	0
NT2.5LV	SNV	chr9	103500145	103500145	C	A	C>A	exonic	Tmem108	nonsynonymous SNV	NM_001359465	exon3	c.G104T	p.R35M	1
NT2.5LV	SNV	chr9	105782210	105782210	G	A	G>A	exonic	Col6a6	nonsynonymous SNV	NM_001102607	exon5	c.C1535T	p.T512I	1
NT2.5LV	SNV	chr9	111333700	111333700	C	A	C>A	exonic	Trank1	nonsynonymous SNV	NM_001164659	exon2	c.C413A	p.T138N	0
NT2.5LV	SNV	chr10	27155464	27155464	C	G	C>G	exonic	Lama2	nonsynonymous SNV	NM_008481	exon32	c.G4597C	p.V1533L	0
NT2.5LV	SNV	chr10	40007388	40007388	A	G	A>G	exonic	Mfsd4b1	nonsynonymous SNV	NM_144821	exon2	c.T65C	p.L22P	0
NT2.5LV	SNV	chr10	59350581	59350581	G	A	G>A	exonic	P4ha1	nonsynonymous SNV	NM_001316370	exon6	c.G641A	p.R214H	2
NT2.5LV	SNV	chr10	59355382	59355382	G	A	G>A	exonic	P4ha1	synonymous SNV	NM_001316370	exon8	c.G870A	p.T290T	1
NT2.5LV	SNV	chr10	62391426	62391426	C	T	C>T	exonic	Hkdc1	nonsynonymous SNV	NM_145419	exon16	c.G2251A	p.V751M	0
NT2.5LV	SNV	chr10	75646948	75646948	G	T	G>T	exonic	Cabin1	nonsynonymous SNV	NM_172549	exon36	c.C6347A	p.T2116N	0
NT2.5LV	SNV	chr10	78071905	78071905	A	C	A>C	exonic	Icosl	nonsynonymous SNV	NM_015790	exon3	c.A298C	p.N100H	0
NT2.5LV	SNV	chr10	79481518	79481518	G	A	G>A	exonic	Vmn2r83	nonsynonymous SNV	NM_001104537	exon5	c.G1594A	p.V532I	0
NT2.5LV	SNV	chr10	80544780	80544780	G	A	G>A	exonic	Rexo1	nonsynonymous SNV	NM_025852	exon8	c.C2720T	p.P907L	0
NT2.5LV	SNV	chr10	85912950	85912950	G	A	G>A	exonic	Prdm4	synonymous SNV	NM_181650	exon2	c.C21T	p.S7S	1
NT2.5LV	SNV	chr10	117278121	117278121	T	C	T>C	exonic	Lyz2	stoploss	NM_017372	exon4	c.A447G	p.X149W	0
NT2.5LV	SNV	chr10	117759200	117759200	C	T	C>T	exonic	Nup107	nonsynonymous SNV	NM_134010	exon24	c.G2237A	p.R746Q	0
NT2.5LV	SNV	chr10	128721225	128721225	G	A	G>A	exonic	Dgka	nonsynonymous SNV	NM_001372366	exon21	c.C1985T	p.A662V	4
NT2.5LV	SNV	chr11	33479250	33479250	A	C	A>C	exonic	Ranbp17	nonsynonymous SNV	NM_001362875	exon10	c.T994G	p.F332V	1
NT2.5LV	SNV	chr11	49113284	49113284	C	A	C>A	exonic	Olfr1396	synonymous SNV	NM_146337	exon1	c.G441T	p.G147G	0
NT2.5LV	SNV	chr11	58684537	58684537	C	G	C>G	exonic	Olfr320	synonymous SNV	NM_207230	exon1	c.C663G	p.V221V	0
NT2.5LV	SNV	chr11	59031647	59031647	C	A	C>A	exonic	Obscn	synonymous SNV	NM_001171512	exon70	c.G17706T	p.G5902G	1
NT2.5LV	SNV	chr11	59571149	59571149	G	A	G>A	exonic	Olfr222	nonsynonymous SNV	NM_001011789	exon1	c.C590T	p.T197M	0
NT2.5LV	SNV	chr11	59742041	59742041	G	A	G>A	exonic	Mprip	synonymous SNV	NM_001368931	exon9	c.G1443A	p.L481L	2
NT2.5LV	SNV	chr11	75469761	75469761	G	C	G>C	exonic	Tlcd2	nonsynonymous SNV	NM_027249	exon4	c.G629C	p.G210A	0
NT2.5LV	SNV	chr11	77515604	77515604	G	T	G>T	exonic	Abhd15	nonsynonymous SNV	NM_026185	exon1	c.G406T	p.A136S	0
NT2.5LV	SNV	chr11	77537954	77537954	A	G	A>G	exonic	Taok1	synonymous SNV	NM_144825	exon20	c.T2919C	p.A973A	2
NT2.5LV	SNV	chr11	82961364	82961364	A	G	A>G	exonic	Slfn5	nonsynonymous SNV	NM_183201	exon6	c.A2315G	p.Q772R	0
NT2.5LV	SNV	chr11	86233141	86233141	G	A	G>A	exonic	Ints2	nonsynonymous SNV	NM_001363130	exon13	c.C1880T	p.A627V	2
NT2.5LV	SNV	chr11	87240658	87240658	A	G	A>G	exonic	Ppm1e	nonsynonymous SNV	NM_177167	exon4	c.T908C	p.L303P	0
NT2.5LV	SNV	chr11	95375052	95375052	G	A	G>A	exonic	Fam117a	nonsynonymous SNV	NM_172543	exon4	c.G533A	p.C178Y	0
NT2.5LV	SNV	chr11	98436593	98436593	T	G	T>G	exonic	Erbb2	synonymous SNV	NM_001003817	exon27	c.T3696G	p.G1232G	0
NT2.5LV	SNV	chr11	98436607	98436607	C	A	C>A	exonic	Erbb2	nonsynonymous SNV	NM_001003817	exon27	c.C3710A	p.T1237N	0
NT2.5LV	SNV	chr11	98649213	98649213	G	T	G>T	exonic	Gsdma2	startloss	NM_001363220	exon2	c.G160T	p.V54L	2
NT2.5LV	SNV	chr11	100102857	100102857	C	T	C>T	exonic	Krt36	nonsynonymous SNV	NM_001174099	exon6	c.G1154A	p.R385Q	0
NT2.5LV	SNV	chr11	100712273	100712273	C	A	C>A	exonic	Kat2a	synonymous SNV	NM_001038010	exon1	c.G132T	p.P44P	1
NT2.5LV	SNV	chr11	102480846	102480846	T	C	T>C	exonic	Gpatch8	nonsynonymous SNV	NM_001159492	exon8	c.A1865G	p.E622G	0
NT2.5LV	SNV	chr11	103028628	103028628	G	A	G>A	exonic	Nmt1	nonsynonymous SNV	NM_008707	exon1	c.G57A	p.M19I	0
NT2.5LV	SNV	chr11	103604562	103604562	T	A	T>A	exonic	Gm884	synonymous SNV	NM_001033434	exon4	c.A1902T	p.I634I	0
NT2.5LV	SNV	chr11	110145597	110145597	C	G	C>G	exonic	Abca9	nonsynonymous SNV	NM_147220	exon13	c.G1685C	p.G562A	0
NT2.5LV	SNV	chr11	117772779	117772779	G	A	G>A	exonic	Tmc6	stopgain	NM_145439	exon13	c.C1606T	p.Q536X	0
NT2.5LV	SNV	chr11	117855244	117855244	A	C	A>C	exonic	Birc5	nonsynonymous SNV	NM_009689	exon4	c.A359C	p.K120T	0
NT2.5LV	SNV	chr11	120629319	120629319	T	G	T>G	exonic	Mafg	nonsynonymous SNV	NM_010756	exon3	c.A454C	p.T152P	0

## Sheet: Summary
Somatic Exonic Mutation Summary
Cell Line	SNV	Indel	DNP	Total
NT2.5	101	1	1	103
NT2.5LM	228	7	3	238
NT2.5LV	206	12	1	219
Mutation Effect Breakdown
Mutation Effect	NT2.5	NT2.5LM	NT2.5LV
frameshift deletion	0	4	4
frameshift insertion	1	0	4
nonframeshift deletion	0	2	3
nonframeshift substitution	1	2	1
nonsynonymous SNV	66	173	152
startloss	1	2	1
stopgain	2	9	10
stoploss	1	1	1
synonymous SNV	29	43	42
unknown	2	2	1

## Sheet: NT2.5
Variant Type	Chr	Start	End	Ref Allele	Alt Allele	Nucleotide Change	Region	Gene	Mutation Effect	Transcript	Exon	CDS Change	Protein Change	Addl. Transcripts
Indel	chr1	4348380	4348380	-	T	->T	exonic	Rp1	frameshift insertion	NM_011283	exon4	c.2507dupA	p.S837Efs*8	0
SNV	chr1	24307662	24307662	C	G	C>G	exonic	Col19a1	nonsynonymous SNV	NM_007733	exon35	c.G2312C	p.G771A	0
SNV	chr1	30821140	30821140	C	A	C>A	exonic	Phf3	nonsynonymous SNV	NM_001081080	exon5	c.G2608T	p.A870S	0
SNV	chr1	45817285	45817285	T	C	T>C	exonic	Wdr75	synonymous SNV	NM_028599	exon14	c.T1467C	p.C489C	0
SNV	chr1	59007103	59007103	C	T	C>T	exonic	C2cd6	nonsynonymous SNV	NM_026600	exon18	c.G2548A	p.V850I	0
SNV	chr1	88266452	88266452	C	T	C>T	exonic	A730008H23Rik;Hjurp	nonsynonymous SNV	NM_172505	exon5	c.G505A	p.D169N	1
SNV	chr1	88266561	88266561	A	G	A>G	exonic	A730008H23Rik;Hjurp	synonymous SNV	NM_172505	exon5	c.T396C	p.D132D	1
SNV	chr1	88266616	88266616	T	C	T>C	exonic	A730008H23Rik;Hjurp	nonsynonymous SNV	NM_172505	exon5	c.A341G	p.E114G	1
SNV	chr1	150105457	150105457	A	T	A>T	exonic	Ptgs2	nonsynonymous SNV	NM_011198	exon10	c.A1490T	p.K497I	0
SNV	chr1	150383084	150383084	G	C	G>C	exonic	Odr4	nonsynonymous SNV	NM_001077237	exon6	c.C448G	p.R150G	2
SNV	chr1	153545289	153545289	G	T	G>T	exonic	Npl	synonymous SNV	NM_028749	exon2	c.C42A	p.A14A	0
SNV	chr1	166307821	166307821	G	T	G>T	exonic	Ildr2	nonsynonymous SNV	NM_001357429	exon5	c.G760T	p.D254Y	5
SNV	chr1	174117107	174117107	A	C	A>C	exonic	Olfr231	nonsynonymous SNV	NM_001005520	exon1	c.T908G	p.V303G	0
SNV	chr1	189659176	189659176	A	G	A>G	exonic	Cenpf	nonsynonymous SNV	NM_001081363	exon12	c.T2458C	p.C820R	0
SNV	chr1	189680358	189680358	C	T	C>T	exonic	Cenpf	nonsynonymous SNV	NM_001081363	exon6	c.G707A	p.G236D	0
SNV	chr2	13334788	13334788	A	G	A>G	exonic	Cubn	synonymous SNV	NM_001081084	exon45	c.T6987C	p.A2329A	0
SNV	chr2	29176882	29176882	C	A	C>A	exonic	Setx	nonsynonymous SNV	NM_198033	exon24	c.C7034A	p.A2345E	0
SNV	chr2	69550930	69550930	G	T	G>T	exonic	Lrp2	synonymous SNV	NM_001081088	exon3	c.C210A	p.G70G	0
SNV	chr2	71838385	71838385	G	A	G>A	exonic	Itga6	nonsynonymous SNV	NM_001277970	exon12	c.G1667A	p.R556Q	1
SNV	chr2	76896935	76896935	C	T	C>T	exonic	Ttn	nonsynonymous SNV	NM_011652	exon60	c.G14639A	p.R4880K	1
SNV	chr2	88006155	88006155	C	A	C>A	exonic	Olfr1160	nonsynonymous SNV	NM_146649	exon1	c.G622T	p.V208L	0
SNV	chr2	105004970	105004970	A	G	A>G	exonic	Eif3m	nonsynonymous SNV	NM_145380	exon8	c.T754C	p.Y252H	0
SNV	chr2	111257163	111257163	G	A	G>A	exonic	Olfr1276	nonsynonymous SNV	NM_146395	exon1	c.G47A	p.G16E	0
SNV	chr2	120713794	120713794	G	T	G>T	exonic	Stard9	nonsynonymous SNV	NM_001370940	exon31	c.G13465T	p.D4489Y	0
SNV	chr2	121098975	121098975	T	A	T>A	exonic	Tgm7	unknown					0
SNV	chr2	121303480	121303480	G	C	G>C	exonic	Map1a	nonsynonymous SNV	NM_001173506	exon4	c.G4062C	p.Q1354H	1
SNV	chr2	131308508	131308508	A	G	A>G	exonic	Rnf24	synonymous SNV	NM_178607	exon3	c.T153C	p.H51H	0
SNV	chr2	162966988	162966988	C	T	C>T	exonic	L3mbtl1	nonsynonymous SNV	NM_001081338	exon18	c.C1780T	p.P594S	0
SNV	chr2	163864922	163864922	G	A	G>A	exonic	Rims4	nonsynonymous SNV	NM_001376942	exon5	c.C532T	p.P178S	1
SNV	chr2	163864928	163864928	G	A	G>A	exonic	Rims4	synonymous SNV	NM_001376942	exon5	c.C526T	p.L176L	1
SNV	chr3	36074353	36074353	G	T	G>T	exonic	Acad9	nonsynonymous SNV	NM_172678	exon4	c.G362T	p.G121V	0
SNV	chr3	90038969	90038969	C	A	C>A	exonic	Ubap2l	nonsynonymous SNV	NM_001165983	exon5	c.G327T	p.K109N	8
SNV	chr3	93397681	93397681	C	T	C>T	exonic	Rptn	nonsynonymous SNV	NM_009100	exon3	c.C2320T	p.H774Y	0
SNV	chr3	93446523	93446523	G	A	G>A	exonic	Tchh	nonsynonymous SNV	NM_001163098	exon2	c.G3269A	p.R1090Q	0
SNV	chr3	93446533	93446533	A	G	A>G	exonic	Tchh	synonymous SNV	NM_001163098	exon2	c.A3279G	p.E1093E	0
SNV	chr3	96683623	96683623	G	A	G>A	exonic	Ankrd35	synonymous SNV	NM_001081139	exon10	c.G1224A	p.P408P	3
SNV	chr3	109166426	109166426	C	G	C>G	exonic	Slc25a24	nonsynonymous SNV	NM_172685	exon10	c.C1344G	p.N448K	0
SNV	chr4	40853752	40853752	G	A	G>A	exonic	B4galt1	synonymous SNV	NM_001378519	exon1	c.C15T	p.T5T	1
SNV	chr4	124804965	124804965	G	A	G>A	exonic	Mtf1	synonymous SNV	NM_008636	exon2	c.G255A	p.Q85Q	0
SNV	chr4	129595123	129595123	C	T	C>T	exonic	Eif3i	nonsynonymous SNV	NM_018799	exon6	c.G464A	p.G155D	0
SNV	chr4	146124343	146124343	A	C	A>C	exonic	Zfp987	nonsynonymous SNV	NM_001037926	exon4	c.A344C	p.N115T	0
SNV	chr4	150638679	150638679	T	C	T>C	exonic	Slc45a1	synonymous SNV	NM_001355737	exon5	c.A210G	p.G70G	1
SNV	chr4	156338661	156338661	T	G	T>G	exonic	Vmn2r123	unknown					0
SNV	chr5	6770073	6770073	C	G	C>G	exonic	Zfp804b	nonsynonymous SNV	NM_001163223	exon4	c.G2989C	p.D997H	0
SNV	chr5	14677416	14677416	C	A	C>A	exonic	Pclo	nonsynonymous SNV	NM_001110796	exon5	c.C6287A	p.S2096Y	1
SNV	chr5	41763750	41763750	G	A	G>A	exonic	Nkx3-2	synonymous SNV	NM_007524	exon1	c.C195T	p.G65G	0
SNV	chr5	107419841	107419841	C	T	C>T	exonic	Ephx4	nonsynonymous SNV	NM_001001804	exon5	c.C664T	p.R222C	2
SNV	chr5	117695459	117695459	C	A	C>A	exonic	Ksr2	nonsynonymous SNV	NM_001312914	exon10	c.C1606A	p.P536T	0
SNV	chr5	121315035	121315035	C	T	C>T	exonic	Hectd4	nonsynonymous SNV	NM_181421	exon36	c.C5615T	p.P1872L	0
SNV	chr5	123563495	123563495	G	T	G>T	exonic	Vps33a	nonsynonymous SNV	NM_001359513	exon6	c.C706A	p.L236I	1
SNV	chr5	146484495	146484495	T	C	T>C	exonic	Gm6408	synonymous SNV	NM_001243104	exon5	c.T933C	p.F311F	0
DNP	chr5	146484498	146484499	CA	TT	CA>TT	exonic	Gm6408	nonframeshift substitution	NM_001243104	exon5	c.936_937delinsTT	p.I313F	0
SNV	chr6	97155408	97155408	T	C	T>C	exonic	Tmf1	synonymous SNV	NM_001081111	exon17	c.A3222G	p.V1074V	0
SNV	chr7	3415063	3415063	G	A	G>A	exonic	Cacng8	nonsynonymous SNV	NM_133190	exon4	c.G730A	p.A244T	0
SNV	chr7	3415068	3415068	C	T	C>T	exonic	Cacng8	synonymous SNV	NM_133190	exon4	c.C735T	p.G245G	0
SNV	chr7	5301004	5301004	C	A	C>A	exonic	Nlrp2	nonsynonymous SNV	NM_177690	exon11	c.G2906T	p.S969I	0
SNV	chr7	7681690	7681690	C	A	C>A	exonic	Vmn2r34	nonsynonymous SNV	NM_001105066	exon4	c.G1502T	p.R501M	0
SNV	chr7	29244120	29244120	C	A	C>A	exonic	Yif1b	nonsynonymous SNV	NM_001110201	exon2	c.C97A	p.Q33K	4
SNV	chr7	41043135	41043135	A	G	A>G	exonic	Gm4884	nonsynonymous SNV	NM_183166	exon3	c.A527G	p.D176G	0
SNV	chr7	45999092	45999092	C	T	C>T	exonic	Abcc6	nonsynonymous SNV	NM_018795	exon16	c.G1975A	p.V659I	0
SNV	chr7	63758416	63758416	C	T	C>T	exonic	Otud7a	synonymous SNV	NM_130880	exon14	c.C2466T	p.S822S	0
SNV	chr7	85559337	85559337	G	T	G>T	exonic	Vmn2r70	nonsynonymous SNV	NM_001384914	exon6	c.C1922A	p.T641N	0
SNV	chr7	96888905	96888905	T	A	T>A	exonic	Tenm4	nonsynonymous SNV	NM_001310760	exon29	c.T5684A	p.L1895Q	2
SNV	chr7	104149296	104149296	A	T	A>T	exonic	Ubqlnl	nonsynonymous SNV	NM_198624	exon1	c.T993A	p.N331K	0
SNV	chr7	127969849	127969849	T	C	T>C	exonic	Fus	synonymous SNV	NM_001347649	exon3	c.T171C	p.S57S	1
SNV	chr7	127969854	127969854	A	C	A>C	exonic	Fus	nonsynonymous SNV	NM_001347649	exon3	c.A176C	p.Y59S	1
SNV	chr7	128694394	128694394	A	C	A>C	exonic	Inpp5f	nonsynonymous SNV	NM_001346517	exon6	c.A587C	p.N196T	1
SNV	chr8	4250546	4250546	G	T	G>T	exonic	Tgfbr3l	synonymous SNV	NM_001195258	exon5	c.G723T	p.P241P	0
SNV	chr8	48342694	48342694	T	C	T>C	exonic	Tenm3	synonymous SNV	NM_001145937	exon8	c.A1560G	p.R520R	1
SNV	chr8	88345170	88345170	G	A	G>A	exonic	Brd7	nonsynonymous SNV	NM_001377013	exon9	c.C1066T	p.P356S	5
SNV	chr8	106807051	106807051	C	A	C>A	exonic	Tango6	synonymous SNV	NM_173037	exon16	c.C2808A	p.V936V	0
SNV	chr8	106807053	106807053	C	A	C>A	exonic	Tango6	stopgain	NM_173037	exon16	c.C2810A	p.S937X	0
SNV	chr9	21637285	21637285	T	G	T>G	exonic	Smarca4	nonsynonymous SNV	NM_001174078	exon6	c.T866G	p.M289R	3
SNV	chr9	21637295	21637295	T	C	T>C	exonic	Smarca4	synonymous SNV	NM_001174078	exon6	c.T876C	p.A292A	3
SNV	chr9	31403510	31403510	T	C	T>C	exonic	Nfrkb	nonsynonymous SNV	NM_001359654	exon16	c.T896C	p.F299S	1
SNV	chr9	31403513	31403513	A	G	A>G	exonic	Nfrkb	nonsynonymous SNV	NM_001359654	exon16	c.A899G	p.E300G	1
SNV	chr9	44881227	44881227	G	A	G>A	exonic	Kmt2a	synonymous SNV	NM_001357549	exon1	c.C48T	p.T16T	0
SNV	chr9	45751186	45751186	G	A	G>A	exonic	Dscaml1	nonsynonymous SNV	NM_001081270	exon31	c.G5275A	p.A1759T	0
SNV	chr9	54331911	54331911	G	T	G>T	exonic	Gldn	nonsynonymous SNV	NM_177350	exon5	c.G576T	p.K192N	0
SNV	chr9	88582098	88582098	A	G	A>G	exonic	Trim43a	nonsynonymous SNV	NM_001034906	exon2	c.A61G	p.S21G	1
SNV	chr9	88582110	88582110	A	G	A>G	exonic	Trim43a	nonsynonymous SNV	NM_001034906	exon2	c.A73G	p.N25D	1
SNV	chr9	107635109	107635109	G	A	G>A	exonic	Gnai2	nonsynonymous SNV	NM_008138	exon1	c.C109T	p.L37F	0
SNV	chr10	8850377	8850377	G	A	G>A	exonic	Sash1	stopgain	NM_175155	exon2	c.C250T	p.Q84X	0
SNV	chr10	20208789	20208789	G	T	G>T	exonic	Rpl32l	nonsynonymous SNV	NM_001101561	exon1	c.G300T	p.K100N	0
SNV	chr10	20208793	20208793	A	T	A>T	exonic	Rpl32l	nonsynonymous SNV	NM_001101561	exon1	c.A304T	p.T102S	0
SNV	chr10	40007388	40007388	A	G	A>G	exonic	Mfsd4b1	nonsynonymous SNV	NM_144821	exon2	c.T65C	p.L22P	0
SNV	chr10	42806625	42806625	G	A	G>A	exonic	Sec63	synonymous SNV	NM_001359284	exon12	c.G891A	p.A297A	4
SNV	chr10	51480743	51480743	G	T	G>T	exonic	Lilr4b	synonymous SNV	NM_001291893	exon1	c.G24T	p.L8L	1
SNV	chr10	76488387	76488387	A	G	A>G	exonic	Mcm3ap	nonsynonymous SNV	NM_019434	exon11	c.A2653G	p.S885G	0
SNV	chr10	79481518	79481518	G	A	G>A	exonic	Vmn2r83	nonsynonymous SNV	NM_001104537	exon5	c.G1594A	p.V532I	0
SNV	chr10	117278121	117278121	T	C	T>C	exonic	Lyz2	stoploss	NM_017372	exon4	c.A447G	p.X149W	0
SNV	chr11	59128314	59128314	C	T	C>T	exonic	Obscn	nonsynonymous SNV	NM_001171512	exon8	c.G2597A	p.G866E	1
SNV	chr11	67921897	67921897	T	C	T>C	exonic	Usp43	nonsynonymous SNV	NM_001291049	exon1	c.A152G	p.Q51R	1
SNV	chr11	67921915	67921915	G	T	G>T	exonic	Usp43	nonsynonymous SNV	NM_001291049	exon1	c.C134A	p.P45Q	1
SNV	chr11	69742730	69742730	T	G	T>G	exonic	Polr2a	synonymous SNV	NM_001291068	exon15	c.A2529C	p.G843G	0
SNV	chr11	71218058	71218058	T	C	T>C	exonic	Nlrp1b	nonsynonymous SNV	NM_001040696	exon3	c.A616G	p.K206E	0
SNV	chr11	77137622	77137622	A	G	A>G	exonic	Efcab5	synonymous SNV	NM_176965	exon5	c.T1290C	p.T430T	0
SNV	chr11	77137637	77137637	C	T	C>T	exonic	Efcab5	synonymous SNV	NM_176965	exon5	c.G1275A	p.S425S	0
SNV	chr11	98436593	98436593	T	G	T>G	exonic	Erbb2	synonymous SNV	NM_001003817	exon27	c.T3696G	p.G1232G	0
SNV	chr11	98436607	98436607	C	A	C>A	exonic	Erbb2	nonsynonymous SNV	NM_001003817	exon27	c.C3710A	p.T1237N	0
SNV	chr11	98649213	98649213	G	T	G>T	exonic	Gsdma2	startloss	NM_001363220	exon2	c.G160T	p.V54L	2
SNV	chr11	111071787	111071787	G	A	G>A	exonic	Kcnj2	nonsynonymous SNV	NM_008425	exon2	c.G4A	p.G2S	0
SNV	chr11	111071808	111071808	T	C	T>C	exonic	Kcnj2	nonsynonymous SNV	NM_008425	exon2	c.T25C	p.Y9H	0

## Sheet: NT2.5LM
Variant Type	Chr	Start	End	Ref Allele	Alt Allele	Nucleotide Change	Region	Gene	Mutation Effect	Transcript	Exon	CDS Change	Protein Change	Addl. Transcripts
SNV	chr1	14755607	14755607	C	A	C>A	exonic	Msc	stopgain	NM_001360810	exon1	c.G142T	p.E48X	1
SNV	chr1	20520293	20520293	G	C	G>C	exonic	Pkhd1	nonsynonymous SNV	NM_153179	exon33	c.C5229G	p.C1743W	0
SNV	chr1	24307662	24307662	C	G	C>G	exonic	Col19a1	nonsynonymous SNV	NM_007733	exon35	c.G2312C	p.G771A	0
SNV	chr1	30821140	30821140	C	A	C>A	exonic	Phf3	nonsynonymous SNV	NM_001081080	exon5	c.G2608T	p.A870S	0
SNV	chr1	36549898	36549898	G	C	G>C	exonic	Sema4c	nonsynonymous SNV	NM_001126047	exon15	c.C2146G	p.P716A	2
SNV	chr1	36550526	36550526	T	G	T>G	exonic	Sema4c	nonsynonymous SNV	NM_001126047	exon14	c.A1655C	p.N552T	2
SNV	chr1	43075396	43075396	G	A	G>A	exonic	Tgfbrap1	synonymous SNV	NM_001357299	exon2	c.C543T	p.C181C	1
SNV	chr1	44174246	44174246	C	A	C>A	exonic	Ercc5	nonsynonymous SNV	NM_011729	exon11	c.C2401A	p.Q801K	0
SNV	chr1	45329068	45329068	C	A	C>A	exonic	Col3a1	nonsynonymous SNV	NM_009930	exon13	c.C910A	p.P304T	0
SNV	chr1	46224714	46224714	C	A	C>A	exonic	Dnah7b	nonsynonymous SNV	NM_001368717	exon38	c.C6223A	p.L2075I	0
SNV	chr1	52648765	52648765	G	T	G>T	exonic	Nemp2	nonsynonymous SNV	NM_001142647	exon8	c.G966T	p.W322C	0
SNV	chr1	75258557	75258557	G	A	G>A	exonic	Ptprn	nonsynonymous SNV	NM_001359281	exon5	c.C188T	p.A63V	1
SNV	chr1	75427733	75427733	C	A	C>A	exonic	Speg	nonsynonymous SNV	NM_001085370	exon33	c.C6076A	p.P2026T	1
SNV	chr1	83159804	83159804	G	A	G>A	exonic	Daw1	synonymous SNV	NM_001372243	exon1	c.G6A	p.K2K	3
SNV	chr1	88232257	88232257	G	T	G>T	exonic	Mroh2a	nonsynonymous SNV	NM_001281466	exon6	c.G570T	p.M190I	0
SNV	chr1	88266121	88266121	G	A	G>A	exonic	A730008H23Rik;Hjurp	nonsynonymous SNV	NM_172505	exon5	c.C836T	p.S279F	1
SNV	chr1	88266452	88266452	C	T	C>T	exonic	A730008H23Rik;Hjurp	nonsynonymous SNV	NM_172505	exon5	c.G505A	p.D169N	1
SNV	chr1	88266561	88266561	A	G	A>G	exonic	A730008H23Rik;Hjurp	synonymous SNV	NM_172505	exon5	c.T396C	p.D132D	1
SNV	chr1	88266616	88266616	T	C	T>C	exonic	A730008H23Rik;Hjurp	nonsynonymous SNV	NM_172505	exon5	c.A341G	p.E114G	1
SNV	chr1	97777332	97777332	A	C	A>C	exonic	Gin1	nonsynonymous SNV	NM_001310773	exon3	c.A146C	p.K49T	1
SNV	chr1	116442328	116442328	A	G	A>G	exonic	Cntnap5a	nonsynonymous SNV	NM_001077425	exon17	c.A2674G	p.N892D	1
SNV	chr1	120607168	120607168	G	T	G>T	exonic	En1	nonsynonymous SNV	NM_010133	exon2	c.G1185T	p.Q395H	0
SNV	chr1	131609579	131609579	G	A	G>A	exonic	Avpr1b	nonsynonymous SNV	NM_011924	exon2	c.G1100A	p.S367N	0
SNV	chr1	132521266	132521266	G	A	G>A	exonic	Cntn2	synonymous SNV	NM_177129	exon16	c.C2004T	p.N668N	0
SNV	chr1	150105457	150105457	A	T	A>T	exonic	Ptgs2	nonsynonymous SNV	NM_011198	exon10	c.A1490T	p.K497I	0
SNV	chr1	150383084	150383084	G	C	G>C	exonic	Odr4	nonsynonymous SNV	NM_001077237	exon6	c.C448G	p.R150G	2
SNV	chr1	155933345	155933345	G	C	G>C	exonic	Cep350	nonsynonymous SNV	NM_001039184	exon10	c.C1484G	p.T495S	0
SNV	chr1	156845027	156845027	T	G	T>G	exonic	Angptl1	nonsynonymous SNV	NM_028333	exon2	c.T422G	p.I141S	0
SNV	chr1	161101585	161101585	G	C	G>C	exonic	Klhl20	nonsynonymous SNV	NM_001039482	exon7	c.C1002G	p.D334E	0
SNV	chr1	166307821	166307821	G	T	G>T	exonic	Ildr2	nonsynonymous SNV	NM_001357429	exon5	c.G760T	p.D254Y	5
SNV	chr1	174117107	174117107	A	C	A>C	exonic	Olfr231	nonsynonymous SNV	NM_001005520	exon1	c.T908G	p.V303G	0
SNV	chr1	177775636	177775636	T	G	T>G	exonic	Adss	nonsynonymous SNV	NM_007422	exon7	c.A608C	p.K203T	0
SNV	chr1	181922441	181922441	G	C	G>C	exonic	Enah	nonsynonymous SNV	NM_001083120	exon6	c.C775G	p.P259A	2
Indel	chr1	185373028	185373028	T	-	T>-	exonic	Eprs	frameshift deletion	NM_001357474	exon5	c.499delT	p.W167Gfs*32	1
SNV	chr1	188444561	188444561	T	C	T>C	exonic	Ush2a	synonymous SNV	NM_021408	exon17	c.T3921C	p.S1307S	0
SNV	chr2	13334788	13334788	A	G	A>G	exonic	Cubn	synonymous SNV	NM_001081084	exon45	c.T6987C	p.A2329A	0
SNV	chr2	19303820	19303820	T	C	T>C	exonic	Armc3	synonymous SNV	NM_001271563	exon18	c.T2262C	p.G754G	2
SNV	chr2	25055733	25055733	C	G	C>G	exonic	Nsmf	synonymous SNV	NM_001039386	exon3	c.C231G	p.G77G	4
SNV	chr2	29176882	29176882	C	A	C>A	exonic	Setx	nonsynonymous SNV	NM_198033	exon24	c.C7034A	p.A2345E	0
SNV	chr2	32686803	32686803	T	C	T>C	exonic	Fpgs	nonsynonymous SNV	NM_010236	exon10	c.A905G	p.Q302R	0
SNV	chr2	35100635	35100635	G	A	G>A	exonic	AI182371	stopgain	NM_001243102	exon1	c.C19T	p.Q7X	5
SNV	chr2	35321569	35321569	C	G	C>G	exonic	Stom	nonsynonymous SNV	NM_013515	exon5	c.G439C	p.A147P	0
Indel	chr2	41268392	41268393	TG	-	TG>-	exonic	Lrp1b	frameshift deletion	NM_053011	exon31	c.5153_5154del	p.A1718Efs*6.	0
SNV	chr2	43780627	43780627	A	G	A>G	exonic	Arhgap15	nonsynonymous SNV	NM_001301831	exon2	c.A22G	p.S8G	1
SNV	chr2	68732063	68732063	G	T	G>T	exonic	4932414N04Rik	stopgain	NM_183113	exon22	c.G1033T	p.G345X	0
SNV	chr2	69161071	69161071	C	A	C>A	exonic	Nostrin	nonsynonymous SNV	NM_181547	exon7	c.C407A	p.A136D	0
SNV	chr2	69550930	69550930	G	T	G>T	exonic	Lrp2	synonymous SNV	NM_001081088	exon3	c.C210A	p.G70G	0
SNV	chr2	76585049	76585049	G	A	G>A	exonic	Osbpl6	nonsynonymous SNV	NM_001290734	exon17	c.G1637A	p.R546H	2
SNV	chr2	76739025	76739025	C	A	C>A	exonic	Ttn	nonsynonymous SNV	NM_028004	exon154	c.G56542T	p.V18848F	2
SNV	chr2	76790818	76790818	G	C	G>C	exonic	Ttn	nonsynonymous SNV	NM_028004	exon91	c.C22192G	p.P7398A	2
SNV	chr2	76891324	76891324	C	T	C>T	exonic	Ttn	nonsynonymous SNV	NM_011652	exon69	c.G17353A	p.V5785I	1
SNV	chr2	76896935	76896935	C	T	C>T	exonic	Ttn	nonsynonymous SNV	NM_011652	exon60	c.G14639A	p.R4880K	1
SNV	chr2	82984522	82984522	C	A	C>A	exonic	Fsip2	nonsynonymous SNV	NM_001370266	exon17	c.C10592A	p.S3531Y	0
SNV	chr2	85648051	85648051	T	G	T>G	exonic	Olfr1002	nonsynonymous SNV	NM_146573	exon1	c.A269C	p.K90T	0
SNV	chr2	86922824	86922824	T	C	T>C	exonic	Olfr1098	nonsynonymous SNV	NM_146845	exon1	c.A707G	p.K236R	0
SNV	chr2	86922975	86922975	C	A	C>A	exonic	Olfr1098	nonsynonymous SNV	NM_146845	exon1	c.G556T	p.A186S	0
SNV	chr2	87192172	87192172	G	T	G>T	exonic	Olfr1112	nonsynonymous SNV	NM_146661	exon1	c.G484T	p.V162F	0
SNV	chr2	87949311	87949311	A	C	A>C	exonic	Olfr1156	synonymous SNV	NM_146817	exon1	c.T921G	p.S307S	0
SNV	chr2	88224250	88224250	A	C	A>C	exonic	Olfr1170	nonsynonymous SNV	NM_146532	exon1	c.T781G	p.Y261D	0
SNV	chr2	88339900	88339900	C	A	C>A	exonic	Olfr1176	nonsynonymous SNV	NM_146771	exon1	c.C334A	p.Q112K	0
SNV	chr2	89097603	89097603	C	A	C>A	exonic	Olfr1220	nonsynonymous SNV	NM_146900	exon1	c.G323T	p.G108V	0
SNV	chr2	89303179	89303179	G	A	G>A	exonic	Olfr1231	nonsynonymous SNV	NM_146454	exon1	c.C412T	p.R138C	0
SNV	chr2	89418223	89418223	G	T	G>T	exonic	Olfr1239	stopgain	NM_146970	exon1	c.C189A	p.Y63X	0
SNV	chr2	110265488	110265488	C	A	C>A	exonic	Bbox1	nonsynonymous SNV	NM_130452	exon7	c.G1130T	p.R377L	0
SNV	chr2	111257163	111257163	G	A	G>A	exonic	Olfr1276	nonsynonymous SNV	NM_146395	exon1	c.G47A	p.G16E	0
SNV	chr2	113833515	113833515	T	C	T>C	exonic	Arhgap11a	nonsynonymous SNV	NM_181416	exon12	c.A2422G	p.T808A	0
SNV	chr2	116063400	116063400	G	C	G>C	exonic	Meis2	stopgain	NM_001136072	exon2	c.C33G	p.Y11X	11
SNV	chr2	120056400	120056400	G	A	G>A	exonic	Sptbn5	synonymous SNV	NM_001370938	exon44	c.C7297T	p.L2433L	0
SNV	chr2	120713794	120713794	G	T	G>T	exonic	Stard9	nonsynonymous SNV	NM_001370940	exon31	c.G13465T	p.D4489Y	0
SNV	chr2	121098975	121098975	T	A	T>A	exonic	Tgm7	unknown					0
SNV	chr2	121303480	121303480	G	C	G>C	exonic	Map1a	nonsynonymous SNV	NM_001173506	exon4	c.G4062C	p.Q1354H	1
SNV	chr2	130504191	130504191	G	C	G>C	exonic	Ptpra	nonsynonymous SNV	NM_001163688	exon3	c.G271C	p.A91P	2
SNV	chr2	131144607	131144607	C	T	C>T	exonic	Hspa12b	synonymous SNV	NM_028306	exon13	c.C1447T	p.L483L	0
SNV	chr2	151504162	151504162	G	T	G>T	exonic	Nsfl1c	nonsynonymous SNV	NM_001291074	exon5	c.G496T	p.A166S	1
SNV	chr2	153987150	153987150	C	G	C>G	exonic	Bpifa6	nonsynonymous SNV	NM_001080811	exon5	c.C596G	p.T199S	0
SNV	chr2	161560231	161560231	C	A	C>A	exonic	Ptprt	nonsynonymous SNV	NM_021464	exon21	c.G3019T	p.V1007F	3
SNV	chr2	163728162	163728162	C	G	C>G	exonic	Ada	nonsynonymous SNV	NM_001272052	exon10	c.G930C	p.M310I	1
SNV	chr2	164168489	164168489	G	A	G>A	exonic	Kcns1	synonymous SNV	NM_008435	exon3	c.C349T	p.L117L	0
SNV	chr2	178283020	178283020	G	A	G>A	exonic	Phactr3	synonymous SNV	NM_001007154	exon6	c.G639A	p.A213A	4
SNV	chr3	14481390	14481390	G	T	G>T	exonic	Slc7a12	nonsynonymous SNV	NM_080852	exon1	c.G594T	p.Q198H	0
Indel	chr3	38982256	38982256	G	-	G>-	exonic	Fat4	stopgain	NM_183221	exon9	c.10056delG	p.M3353*.	0
SNV	chr3	38982258	38982258	T	A	T>A	exonic	Fat4	nonsynonymous SNV	NM_183221	exon9	c.T10058A	p.M3353K	0
SNV	chr3	64388835	64388835	G	A	G>A	exonic	Vmn2r4	nonsynonymous SNV	NM_001104615	exon5	c.C2261T	p.A754V	1
SNV	chr3	68927772	68927772	C	T	C>T	exonic	Ift80	synonymous SNV	NM_026641	exon13	c.G1335A	p.A445A	0
SNV	chr3	82038060	82038060	A	G	A>G	exonic	Gucy1b1	nonsynonymous SNV	NM_001161796	exon10	c.T1270C	p.F424L	1
SNV	chr3	87976050	87976050	G	C	G>C	exonic	Nes	nonsynonymous SNV	NM_016701	exon4	c.G1615C	p.E539Q	0
SNV	chr3	88440723	88440723	G	T	G>T	exonic	Sema4a	nonsynonymous SNV	NM_001163489	exon11	c.C1290A	p.S430R	3
SNV	chr3	89367165	89367165	G	T	G>T	exonic	Dcst2	nonsynonymous SNV	NM_001370853	exon5	c.G711T	p.Q237H	0
SNV	chr3	90038969	90038969	C	A	C>A	exonic	Ubap2l	nonsynonymous SNV	NM_001165983	exon5	c.G327T	p.K109N	8
SNV	chr3	93203666	93203666	T	C	T>C	exonic	Flg2	synonymous SNV	NM_001013804	exon4	c.T3000C	p.G1000G	0
SNV	chr3	93203669	93203669	T	G	T>G	exonic	Flg2	nonsynonymous SNV	NM_001013804	exon4	c.T3003G	p.H1001Q	0
SNV	chr3	93219765	93219765	T	G	T>G	exonic	Flg2	nonsynonymous SNV	NM_001013804	exon7	c.T5977G	p.L1993V	0
SNV	chr3	96145093	96145093	G	T	G>T	exonic	Otud7b	stopgain	NM_001025614	exon6	c.G730T	p.E244X	1
SNV	chr3	98104353	98104353	C	G	C>G	exonic	Notch2	nonsynonymous SNV	NM_010928	exon11	c.C1686G	p.F562L	0
SNV	chr3	100100323	100100323	C	A	C>A	exonic	Spag17	nonsynonymous SNV	NM_028892	exon41	c.C5808A	p.S1936R	0
SNV	chr3	103279884	103279884	G	T	G>T	exonic	Trim33	synonymous SNV	NM_001079830	exon1	c.G6T	p.A2A	1
Indel	chr3	105459187	105459187	C	-	C>-	exonic	Kcnd3	frameshift deletion	NM_001039347	exon2	c.372delC	p.E126Rfs*63	1
SNV	chr3	108960265	108960265	G	A	G>A	exonic	Henmt1	nonsynonymous SNV	NM_001078646	exon8	c.G1115A	p.C372Y	1
SNV	chr3	109166426	109166426	C	G	C>G	exonic	Slc25a24	nonsynonymous SNV	NM_172685	exon10	c.C1344G	p.N448K	0
SNV	chr3	142853484	142853484	T	A	T>A	exonic	Pkn2	nonsynonymous SNV	NM_178654	exon2	c.A279T	p.L93F	0
SNV	chr4	4070011	4070011	C	T	C>T	exonic	Sdr16c6	nonsynonymous SNV	NM_001080710	exon3	c.G328A	p.E110K	0
SNV	chr4	11785132	11785132	T	A	T>A	exonic	Cdh17	nonsynonymous SNV	NM_019753	exon9	c.T923A	p.F308Y	0
SNV	chr4	45314304	45314304	C	A	C>A	exonic	Trmt10b	synonymous SNV	NM_027266	exon8	c.C745A	p.R249R	0
SNV	chr4	123297953	123297953	C	A	C>A	exonic	Pabpc4	nonsynonymous SNV	NM_001356377	exon13	c.C1768A	p.L590M	2
SNV	chr4	132494598	132494598	A	T	A>T	exonic	Sesn2	nonsynonymous SNV	NM_144907	exon9	c.T1222A	p.Y408N	0
SNV	chr4	140575322	140575322	G	T	G>T	exonic	Arhgef10l	nonsynonymous SNV	NM_001112722	exon14	c.C1423A	p.L475M	3
SNV	chr4	146464429	146464429	C	A	C>A	exonic	Zfp991;Zfp992	nonsynonymous SNV	NM_001085522	exon3	c.C56A	p.A19D	1
SNV	chr4	153432839	153432839	C	T	C>T	exonic	Ajap1	nonsynonymous SNV	NM_001099299	exon2	c.G44A	p.R15H	0
SNV	chr4	154839046	154839046	A	G	A>G	exonic	Ttc34	nonsynonymous SNV	NM_172878	exon2	c.A211G	p.I71V	0
SNV	chr5	6770073	6770073	C	G	C>G	exonic	Zfp804b	nonsynonymous SNV	NM_001163223	exon4	c.G2989C	p.D997H	0
SNV	chr5	14677416	14677416	C	A	C>A	exonic	Pclo	nonsynonymous SNV	NM_001110796	exon5	c.C6287A	p.S2096Y	1
SNV	chr5	14714115	14714115	T	C	T>C	exonic	Pclo	nonsynonymous SNV	NM_001110796	exon7	c.T12601C	p.S4201P	1
DNP	chr5	34551647	34551648	CG	GC	CG>GC	exonic	Sh3bp2	nonframeshift substitution	NM_001145858	exon2	c.215_216delinsGC	p.A72G	2
SNV	chr5	39614561	39614561	G	T	G>T	exonic	Hs3st1	nonsynonymous SNV	NM_010474	exon2	c.C738A	p.N246K	0
SNV	chr5	41795119	41795119	T	C	T>C	exonic	Bod1l	nonsynonymous SNV	NM_001081422	exon23	c.A8555G	p.D2852G	1
SNV	chr5	52741819	52741819	C	A	C>A	exonic	Pi4k2b	nonsynonymous SNV	NM_025951	exon1	c.C101A	p.A34E	1
SNV	chr5	69110368	69110368	C	G	C>G	exonic	Kctd8	nonsynonymous SNV	NM_175519	exon2	c.G1398C	p.W466C	0
SNV	chr5	73629704	73629704	A	C	A>C	exonic	Lrrc66	stopgain	NM_153568	exon2	c.T302G	p.L101X	0
SNV	chr5	74585062	74585062	A	G	A>G	exonic	Fip1l1	synonymous SNV	NM_024183	exon12	c.A1011G	p.V337V	3
SNV	chr5	90264115	90264115	C	G	C>G	exonic	Ankrd17	nonsynonymous SNV	NM_198010	exon20	c.G3136C	p.G1046R	1
Indel	chr5	110353083	110353085	GCC	-	GCC>-	exonic	Lrcol1	nonframeshift deletion	NM_001310709	exon2	c.18_20del	p.P8del.	0
SNV	chr5	117695459	117695459	C	A	C>A	exonic	Ksr2	nonsynonymous SNV	NM_001312914	exon10	c.C1606A	p.P536T	0
SNV	chr5	121315035	121315035	C	T	C>T	exonic	Hectd4	nonsynonymous SNV	NM_181421	exon36	c.C5615T	p.P1872L	0
SNV	chr5	121328206	121328206	G	A	G>A	exonic	Hectd4	nonsynonymous SNV	NM_181421	exon46	c.G7199A	p.R2400Q	0
SNV	chr5	124133181	124133181	A	G	A>G	exonic	Pitpnm2	nonsynonymous SNV	NM_001289472	exon9	c.T1202C	p.L401P	1
SNV	chr5	124283641	124283641	G	A	G>A	exonic	Mphosph9	nonsynonymous SNV	NM_001081323	exon14	c.C2236T	p.R746W	1
DNP	chr5	138444858	138444859	AT	TG	AT>TG	exonic	Zfp157	nonframeshift substitution	NM_028130	exon2	c.110_111delinsTG	p.Y37L	0
SNV	chr5	140524637	140524637	G	C	G>C	exonic	Chst12	nonsynonymous SNV	NM_021528	exon2	c.G1018C	p.D340H	0
Indel	chr5	144997059	144997059	G	-	G>-	exonic	Kpna7	frameshift deletion	NM_001347531	exon7	c.886delC	p.H296Ifs*4	1
SNV	chr5	145569414	145569414	C	A	C>A	exonic	Cyp3a41a;Cyp3a41b	nonsynonymous SNV	NM_001105159	exon9	c.G825T	p.M275I	1
SNV	chr5	147274564	147274564	T	G	T>G	exonic	Pdx1	synonymous SNV	NM_008814	exon2	c.T594G	p.R198R	0
SNV	chr5	150541317	150541317	A	C	A>C	exonic	Brca2	nonsynonymous SNV	NM_001081001	exon11	c.A4545C	p.K1515N	1
SNV	chr6	34857697	34857697	C	A	C>A	exonic	Agbl3	nonsynonymous SNV	NM_001289657	exon19	c.C2086A	p.Q696K	2
SNV	chr6	52314118	52314118	C	T	C>T	exonic	Evx1	nonsynonymous SNV	NM_007966	exon1	c.C274T	p.L92F	0
SNV	chr6	83054092	83054092	C	G	C>G	exonic	Htra2	nonsynonymous SNV	NM_019752	exon1	c.G335C	p.G112A	0
SNV	chr6	97112160	97112160	G	C	G>C	exonic	Eogt	nonsynonymous SNV	NM_175313	exon18	c.C1484G	p.S495C	0
SNV	chr6	114678057	114678057	G	T	G>T	exonic	Atg7	nonsynonymous SNV	NM_001379130	exon4	c.G369T	p.E123D	3
SNV	chr6	121031044	121031044	C	T	C>T	exonic	Mical3	nonsynonymous SNV	NM_001270475	exon10	c.G1402A	p.V468I	1
SNV	chr6	124826306	124826306	C	A	C>A	exonic	Usp5	nonsynonymous SNV	NM_001326594	exon2	c.G230T	p.R77L	1
SNV	chr6	125186123	125186123	T	C	T>C	exonic	Ncapd2	nonsynonymous SNV	NM_146171	exon5	c.A421G	p.I141V	0
SNV	chr6	127657924	127657924	G	T	G>T	exonic	Cracr2a	nonsynonymous SNV	NM_001368877	exon16	c.G1917T	p.E639D	0
SNV	chr6	129467534	129467534	C	A	C>A	exonic	Clec7a	nonsynonymous SNV	NM_001309637	exon3	c.G337T	p.D113Y	0
SNV	chr6	140583915	140583915	G	C	G>C	exonic	Plekha5	nonsynonymous SNV	NM_144920	exon26	c.G3102C	p.L1034F	0
SNV	chr6	145048691	145048691	G	C	G>C	exonic	Bcat1	nonsynonymous SNV	NM_001024468	exon1	c.C79G	p.P27A	0
SNV	chr6	148809915	148809915	A	T	A>T	exonic	Ipo8	nonsynonymous SNV	NM_001081113	exon8	c.T874A	p.F292I	0
SNV	chr7	3716812	3716812	A	T	A>T	exonic	Pirb	nonsynonymous SNV	NM_001357394	exon7	c.T1334A	p.F445Y	1
SNV	chr7	4276486	4276486	A	G	A>G	exonic	Pira6	nonsynonymous SNV	NM_008848	exon5	c.A709G	p.T237A	0
SNV	chr7	4707906	4707906	G	A	G>A	exonic	Brsk1	nonsynonymous SNV	NM_001003920	exon15	c.G1726A	p.A576T	0
SNV	chr7	4794489	4794489	C	G	C>G	exonic	Rpl28	synonymous SNV	NM_009081	exon5	c.C396G	p.R132R	0
SNV	chr7	5301004	5301004	C	A	C>A	exonic	Nlrp2	nonsynonymous SNV	NM_177690	exon11	c.G2906T	p.S969I	0
SNV	chr7	16134306	16134306	C	A	C>A	exonic	Slc8a2	nonsynonymous SNV	NM_001347561	exon2	c.C462A	p.N154K	1
SNV	chr7	21012226	21012226	G	T	G>T	exonic	Vmn1r119	nonsynonymous SNV	NM_001166708	exon1	c.C230A	p.A77D	0
Indel	chr7	27197176	27197211	CCCCCTCCCCCCCCTCCTGCTCCTCCCCCTCCCCCT	-	CCCCCTCCCCCCCCTCCTGCTCCTCCCCCTCCCCCT>-	exonic	BC024978	nonframeshift deletion	NM_001243888	exon2	c.163_198del		0
SNV	chr7	29244120	29244120	C	A	C>A	exonic	Yif1b	nonsynonymous SNV	NM_001110201	exon2	c.C97A	p.Q33K	4
SNV	chr7	29339164	29339164	T	C	T>C	exonic	Sipa1l3	nonsynonymous SNV	NM_001081028	exon17	c.A4204G	p.R1402G	0
SNV	chr7	29725347	29725347	A	G	A>G	exonic	Catsperg2	synonymous SNV	NM_029714	exon2	c.T123C	p.A41A	0
SNV	chr7	29725349	29725349	C	T	C>T	exonic	Catsperg2	nonsynonymous SNV	NM_029714	exon2	c.G121A	p.A41T	0
SNV	chr7	35603889	35603889	G	T	G>T	exonic	Ankrd27	nonsynonymous SNV	NM_001358876	exon8	c.G693T	p.M231I	2
SNV	chr7	45866565	45866565	C	T	C>T	exonic	Grin2d	startloss	NM_008172	exon1	c.G3A	p.M1?	0
SNV	chr7	45999092	45999092	C	T	C>T	exonic	Abcc6	nonsynonymous SNV	NM_018795	exon16	c.G1975A	p.V659I	0
SNV	chr7	56293766	56293766	C	A	C>A	exonic	Oca2	nonsynonymous SNV	NM_021879	exon7	c.C686A	p.A229E	0
SNV	chr7	66069206	66069206	T	G	T>G	exonic	Snrpa1	nonsynonymous SNV	NM_021336	exon4	c.T349G	p.Y117D	0
SNV	chr7	83652846	83652846	A	C	A>C	exonic	Il16	nonsynonymous SNV	NM_001360089	exon2	c.T67G	p.L23V	3
SNV	chr7	85559337	85559337	G	T	G>T	exonic	Vmn2r70	nonsynonymous SNV	NM_001384914	exon6	c.C1922A	p.T641N	0
SNV	chr7	103565035	103565035	C	A	C>A	exonic	Olfr616	synonymous SNV	NM_147099	exon1	c.G243T	p.P81P	0
SNV	chr7	104149296	104149296	A	T	A>T	exonic	Ubqlnl	nonsynonymous SNV	NM_198624	exon1	c.T993A	p.N331K	0
SNV	chr7	107955564	107955564	G	A	G>A	exonic	Olfr474	nonsynonymous SNV	NM_146495	exon1	c.G922A	p.V308I	0
SNV	chr7	107967595	107967595	T	G	T>G	exonic	Olfr476	nonsynonymous SNV	NM_146924	exon1	c.T197G	p.L66R	0
SNV	chr7	126825031	126825031	C	G	C>G	exonic	Tlcd3b	nonsynonymous SNV	NM_029978	exon2	c.C146G	p.A49G	1
SNV	chr7	137313852	137313852	C	G	C>G	exonic	Ebf3	nonsynonymous SNV	NM_001113414	exon1	c.G62C	p.G21A	2
SNV	chr8	40286579	40286579	C	T	C>T	exonic	Fgf20	synonymous SNV	NM_030610	exon1	c.G129A	p.A43A	0
SNV	chr8	41309688	41309688	T	C	T>C	exonic	Pcm1	nonsynonymous SNV	NM_023662	exon24	c.T4268C	p.L1423S	0
SNV	chr8	43185456	43185456	C	G	C>G	exonic	Triml2	nonsynonymous SNV	NM_001381929	exon4	c.C460G	p.Q154E	1
SNV	chr8	48342694	48342694	T	C	T>C	exonic	Tenm3	synonymous SNV	NM_001145937	exon8	c.A1560G	p.R520R	1
SNV	chr8	55872524	55872524	C	G	C>G	exonic	Adam29	nonsynonymous SNV	NM_175939	exon2	c.G894C	p.R298S	0
SNV	chr8	67491496	67491496	T	G	T>G	exonic	Nat1	nonsynonymous SNV	NM_008673	exon1	c.T523G	p.F175V	0
SNV	chr8	70836343	70836343	G	C	G>C	exonic	Arrdc2	nonsynonymous SNV	NM_027560	exon7	c.C1047G	p.S349R	0
SNV	chr8	71611386	71611386	C	G	C>G	exonic	Colgalt1	nonsynonymous SNV	NM_001364443	exon1	c.C187G	p.P63A	1
SNV	chr8	81014188	81014188	A	C	A>C	exonic	Usp38	synonymous SNV	NM_027554	exon1	c.T249G	p.T83T	0
SNV	chr8	110583995	110583995	C	T	C>T	exonic	Hydin	synonymous SNV	NM_172916	exon73	c.C12322T	p.L4108L	0
SNV	chr8	111056609	111056609	G	T	G>T	exonic	Exosc6	nonsynonymous SNV	NM_028274	exon1	c.G239T	p.G80V	0
SNV	chr8	111890309	111890309	C	G	C>G	exonic	Chst5	synonymous SNV	NM_019950	exon2	c.G678C	p.L226L	0
SNV	chr8	123256833	123256833	C	T	C>T	exonic	Zfp276	nonsynonymous SNV	NM_020497	exon4	c.C974T	p.T325M	0
SNV	chr9	4309355	4309355	G	C	G>C	exonic	Aasdhppt	nonsynonymous SNV	NM_001326359	exon1	c.C82G	p.P28A	1
SNV	chr9	15992306	15992306	G	T	G>T	exonic	Fat3	synonymous SNV	NM_001080814	exon11	c.C8904A	p.P2968P	0
SNV	chr9	15998870	15998870	G	C	G>C	exonic	Fat3	nonsynonymous SNV	NM_001080814	exon10	c.C5847G	p.H1949Q	0
SNV	chr9	18595403	18595403	G	C	G>C	exonic	Muc16	synonymous SNV	NM_001378248	exon21	c.C20139G	p.V6713V	0
SNV	chr9	20260665	20260665	G	C	G>C	exonic	Olfr872	nonsynonymous SNV	NM_146560	exon2	c.G824C	p.G275A	0
SNV	chr9	44881227	44881227	G	A	G>A	exonic	Kmt2a	synonymous SNV	NM_001357549	exon1	c.C48T	p.T16T	0
SNV	chr9	53459753	53459753	A	C	A>C	exonic	Atm	nonsynonymous SNV	NM_007499	exon46	c.T6785G	p.V2262G	0
SNV	chr9	53552471	53552471	A	G	A>G	exonic	Npat	nonsynonymous SNV	NM_001081152	exon6	c.A553G	p.T185A	0
SNV	chr9	54331911	54331911	G	T	G>T	exonic	Gldn	nonsynonymous SNV	NM_177350	exon5	c.G576T	p.K192N	0
SNV	chr9	70580860	70580860	T	C	T>C	exonic	Sltm	nonsynonymous SNV	NM_001357911	exon13	c.T1495C	p.Y499H	2
SNV	chr9	108293977	108293977	G	A	G>A	exonic	Nicn1	nonsynonymous SNV	NM_001364505	exon3	c.G356A	p.R119Q	1
SNV	chr9	111333700	111333700	C	A	C>A	exonic	Trank1	nonsynonymous SNV	NM_001164659	exon2	c.C413A	p.T138N	0
SNV	chr10	5030386	5030386	G	T	G>T	exonic	Syne1	nonsynonymous SNV	NM_022027	exon16	c.C2599A	p.P867T	3
SNV	chr10	18531963	18531963	A	G	A>G	exonic	Nhsl1	nonsynonymous SNV	NM_173390	exon7	c.A4754G	p.Q1585R	1
SNV	chr10	27155464	27155464	C	G	C>G	exonic	Lama2	nonsynonymous SNV	NM_008481	exon32	c.G4597C	p.V1533L	0
SNV	chr10	39970552	39970552	C	G	C>G	exonic	Mfsd4b5	nonsynonymous SNV	NM_001113385	exon4	c.G1031C	p.G344A	0
SNV	chr10	40007388	40007388	A	G	A>G	exonic	Mfsd4b1	nonsynonymous SNV	NM_144821	exon2	c.T65C	p.L22P	0
SNV	chr10	75646948	75646948	G	T	G>T	exonic	Cabin1	nonsynonymous SNV	NM_172549	exon36	c.C6347A	p.T2116N	0
SNV	chr10	77259340	77259340	C	T	C>T	exonic	Pofut2	synonymous SNV	NM_030262	exon1	c.C18T	p.V6V	0
SNV	chr10	78071905	78071905	A	C	A>C	exonic	Icosl	nonsynonymous SNV	NM_015790	exon3	c.A298C	p.N100H	0
SNV	chr10	79481518	79481518	G	A	G>A	exonic	Vmn2r83	nonsynonymous SNV	NM_001104537	exon5	c.G1594A	p.V532I	0
DNP	chr10	80054994	80054995	GG	TA	GG>TA	exonic	Gpx4	unknown					0
SNV	chr10	86833978	86833978	G	A	G>A	exonic	Nt5dc3	nonsynonymous SNV	NM_175331	exon14	c.G1436A	p.R479Q	0
SNV	chr10	117278121	117278121	T	C	T>C	exonic	Lyz2	stoploss	NM_017372	exon4	c.A447G	p.X149W	0
SNV	chr10	117759200	117759200	C	T	C>T	exonic	Nup107	nonsynonymous SNV	NM_134010	exon24	c.G2237A	p.R746Q	0
SNV	chr10	128290704	128290704	T	C	T>C	exonic	Stat2	nonsynonymous SNV	NM_019963	exon23	c.T2297C	p.L766P	0
SNV	chr11	33479250	33479250	A	C	A>C	exonic	Ranbp17	nonsynonymous SNV	NM_001362875	exon10	c.T994G	p.F332V	1
SNV	chr11	49113284	49113284	C	A	C>A	exonic	Olfr1396	synonymous SNV	NM_146337	exon1	c.G441T	p.G147G	0
SNV	chr11	53422855	53422855	G	T	G>T	exonic	Leap2	stopgain	NM_153069	exon2	c.C89A	p.S30X	0
SNV	chr11	58684537	58684537	C	G	C>G	exonic	Olfr320	synonymous SNV	NM_207230	exon1	c.C663G	p.V221V	0
SNV	chr11	59742041	59742041	G	A	G>A	exonic	Mprip	synonymous SNV	NM_001368931	exon9	c.G1443A	p.L481L	2
SNV	chr11	62552220	62552220	C	T	C>T	exonic	Ubb	synonymous SNV	NM_001313984	exon2	c.C75T	p.N25N	1
SNV	chr11	65178543	65178543	G	T	G>T	exonic	Myocd	nonsynonymous SNV	NM_146386	exon13	c.C2710A	p.L904I	1
SNV	chr11	75469761	75469761	G	C	G>C	exonic	Tlcd2	nonsynonymous SNV	NM_027249	exon4	c.G629C	p.G210A	0
SNV	chr11	77515604	77515604	G	T	G>T	exonic	Abhd15	nonsynonymous SNV	NM_026185	exon1	c.G406T	p.A136S	0
SNV	chr11	77537954	77537954	A	G	A>G	exonic	Taok1	synonymous SNV	NM_144825	exon20	c.T2919C	p.A973A	2
SNV	chr11	86233141	86233141	G	A	G>A	exonic	Ints2	nonsynonymous SNV	NM_001363130	exon13	c.C1880T	p.A627V	2
SNV	chr11	87240658	87240658	A	G	A>G	exonic	Ppm1e	nonsynonymous SNV	NM_177167	exon4	c.T908C	p.L303P	0
SNV	chr11	98422060	98422060	T	C	T>C	exonic	Erbb2	synonymous SNV	NM_001003817	exon4	c.T448C	p.L150L	0
SNV	chr11	98434511	98434511	G	A	G>A	exonic	Erbb2	synonymous SNV	NM_001003817	exon22	c.G2664A	p.K888K	0
SNV	chr11	98436593	98436593	T	G	T>G	exonic	Erbb2	synonymous SNV	NM_001003817	exon27	c.T3696G	p.G1232G	0
SNV	chr11	98436607	98436607	C	A	C>A	exonic	Erbb2	nonsynonymous SNV	NM_001003817	exon27	c.C3710A	p.T1237N	0
SNV	chr11	98649213	98649213	G	T	G>T	exonic	Gsdma2	startloss	NM_001363220	exon2	c.G160T	p.V54L	2
SNV	chr11	99780425	99780425	G	A	G>A	exonic	Krtap4-8	synonymous SNV	NM_001085547	exon1	c.C219T	p.S73S	0
SNV	chr11	100102857	100102857	C	T	C>T	exonic	Krt36	nonsynonymous SNV	NM_001174099	exon6	c.G1154A	p.R385Q	0
SNV	chr11	102480846	102480846	T	C	T>C	exonic	Gpatch8	nonsynonymous SNV	NM_001159492	exon8	c.A1865G	p.E622G	0
SNV	chr11	103028628	103028628	G	A	G>A	exonic	Nmt1	nonsynonymous SNV	NM_008707	exon1	c.G57A	p.M19I	0
SNV	chr11	103604562	103604562	T	A	T>A	exonic	Gm884	synonymous SNV	NM_001033434	exon4	c.A1902T	p.I634I	0
SNV	chr11	106339174	106339174	C	T	C>T	exonic	Scn4a	nonsynonymous SNV	NM_133199	exon11	c.G1807A	p.V603M	0
SNV	chr11	107175701	107175701	G	A	G>A	exonic	Nol11	nonsynonymous SNV	NM_001363078	exon10	c.C1055T	p.A352V	2
SNV	chr11	110145597	110145597	C	G	C>G	exonic	Abca9	nonsynonymous SNV	NM_147220	exon13	c.G1685C	p.G562A	0
SNV	chr11	116223680	116223680	C	T	C>T	exonic	Evpl	synonymous SNV	NM_025276	exon22	c.G3183A	p.L1061L	0
SNV	chr11	116478557	116478557	A	T	A>T	exonic	Prpsap1	nonsynonymous SNV	NM_026364	exon5	c.T547A	p.S183T	0
SNV	chr11	117855244	117855244	A	C	A>C	exonic	Birc5	nonsynonymous SNV	NM_009689	exon4	c.A359C	p.K120T	0
SNV	chr11	120629319	120629319	T	G	T>G	exonic	Mafg	nonsynonymous SNV	NM_010756	exon3	c.A454C	p.T152P	0

## Sheet: NT2.5LV
Variant Type	Chr	Start	End	Ref Allele	Alt Allele	Nucleotide Change	Region	Gene	Mutation Effect	Transcript	Exon	CDS Change	Protein Change	Addl. Transcripts
SNV	chr1	20520293	20520293	G	C	G>C	exonic	Pkhd1	nonsynonymous SNV	NM_153179	exon33	c.C5229G	p.C1743W	0
SNV	chr1	20523813	20523813	C	A	C>A	exonic	Pkhd1	nonsynonymous SNV	NM_153179	exon32	c.G4075T	p.V1359F	0
SNV	chr1	24307662	24307662	C	G	C>G	exonic	Col19a1	nonsynonymous SNV	NM_007733	exon35	c.G2312C	p.G771A	0
SNV	chr1	24728559	24728559	C	T	C>T	exonic	Lmbrd1	nonsynonymous SNV	NM_001310483	exon8	c.C431T	p.S144L	1
SNV	chr1	30821140	30821140	C	A	C>A	exonic	Phf3	nonsynonymous SNV	NM_001081080	exon5	c.G2608T	p.A870S	0
SNV	chr1	36549898	36549898	G	C	G>C	exonic	Sema4c	nonsynonymous SNV	NM_001126047	exon15	c.C2146G	p.P716A	2
SNV	chr1	36550526	36550526	T	G	T>G	exonic	Sema4c	nonsynonymous SNV	NM_001126047	exon14	c.A1655C	p.N552T	2
SNV	chr1	44174246	44174246	C	A	C>A	exonic	Ercc5	nonsynonymous SNV	NM_011729	exon11	c.C2401A	p.Q801K	0
SNV	chr1	45329068	45329068	C	A	C>A	exonic	Col3a1	nonsynonymous SNV	NM_009930	exon13	c.C910A	p.P304T	0
SNV	chr1	45912296	45912296	C	T	C>T	exonic	Slc40a1	nonsynonymous SNV	NM_016917	exon6	c.G700A	p.A234T	0
SNV	chr1	46224714	46224714	C	A	C>A	exonic	Dnah7b	nonsynonymous SNV	NM_001368717	exon38	c.C6223A	p.L2075I	0
SNV	chr1	75258557	75258557	G	A	G>A	exonic	Ptprn	nonsynonymous SNV	NM_001359281	exon5	c.C188T	p.A63V	1
SNV	chr1	75427733	75427733	C	A	C>A	exonic	Speg	nonsynonymous SNV	NM_001085370	exon33	c.C6076A	p.P2026T	1
SNV	chr1	75484440	75484440	G	C	G>C	exonic	Tmem198	nonsynonymous SNV	NM_177056	exon4	c.G808C	p.E270Q	0
Indel	chr1	75484445	75484445	-	ACGGCATA	->ACGGCATA	exonic	Tmem198	frameshift insertion	NM_177056	exon4	c.813_814insACGGCATA	p.R272Tfs*62	0
SNV	chr1	83159804	83159804	G	A	G>A	exonic	Daw1	synonymous SNV	NM_001372243	exon1	c.G6A	p.K2K	3
SNV	chr1	88232257	88232257	G	T	G>T	exonic	Mroh2a	nonsynonymous SNV	NM_001281466	exon6	c.G570T	p.M190I	0
SNV	chr1	88266121	88266121	G	A	G>A	exonic	A730008H23Rik;Hjurp	nonsynonymous SNV	NM_172505	exon5	c.C836T	p.S279F	1
SNV	chr1	88266452	88266452	C	T	C>T	exonic	A730008H23Rik;Hjurp	nonsynonymous SNV	NM_172505	exon5	c.G505A	p.D169N	1
SNV	chr1	88266561	88266561	A	G	A>G	exonic	A730008H23Rik;Hjurp	synonymous SNV	NM_172505	exon5	c.T396C	p.D132D	1
SNV	chr1	88266616	88266616	T	C	T>C	exonic	A730008H23Rik;Hjurp	nonsynonymous SNV	NM_172505	exon5	c.A341G	p.E114G	1
SNV	chr1	97777332	97777332	A	C	A>C	exonic	Gin1	nonsynonymous SNV	NM_001310773	exon3	c.A146C	p.K49T	1
SNV	chr1	150105457	150105457	A	T	A>T	exonic	Ptgs2	nonsynonymous SNV	NM_011198	exon10	c.A1490T	p.K497I	0
SNV	chr1	150454857	150454857	A	C	A>C	exonic	Prg4	synonymous SNV	NM_021400	exon7	c.T2064G	p.T688T	0
SNV	chr1	150454860	150454860	T	G	T>G	exonic	Prg4	synonymous SNV	NM_021400	exon7	c.A2061C	p.T687T	0
SNV	chr1	155933345	155933345	G	C	G>C	exonic	Cep350	nonsynonymous SNV	NM_001039184	exon10	c.C1484G	p.T495S	0
SNV	chr1	161101585	161101585	G	C	G>C	exonic	Klhl20	nonsynonymous SNV	NM_001039482	exon7	c.C1002G	p.D334E	0
SNV	chr1	166307821	166307821	G	T	G>T	exonic	Ildr2	nonsynonymous SNV	NM_001357429	exon5	c.G760T	p.D254Y	5
SNV	chr1	173642599	173642599	C	A	C>A	exonic	Ifi209	nonsynonymous SNV	NM_175026	exon5	c.C752A	p.T251K	0
SNV	chr1	173642602	173642602	A	G	A>G	exonic	Ifi209	nonsynonymous SNV	NM_175026	exon5	c.A755G	p.E252G	0
SNV	chr1	174117107	174117107	A	C	A>C	exonic	Olfr231	nonsynonymous SNV	NM_001005520	exon1	c.T908G	p.V303G	0
SNV	chr1	181922441	181922441	G	C	G>C	exonic	Enah	nonsynonymous SNV	NM_001083120	exon6	c.C775G	p.P259A	2
Indel	chr1	185373028	185373028	T	-	T>-	exonic	Eprs	frameshift deletion	NM_001357474	exon5	c.499delT	p.W167Gfs*32	1
SNV	chr1	188444561	188444561	T	C	T>C	exonic	Ush2a	synonymous SNV	NM_021408	exon17	c.T3921C	p.S1307S	0
SNV	chr2	13334788	13334788	A	G	A>G	exonic	Cubn	synonymous SNV	NM_001081084	exon45	c.T6987C	p.A2329A	0
SNV	chr2	20849575	20849575	T	A	T>A	exonic	Arhgap21	nonsynonymous SNV	NM_001081364	exon24	c.A4975T	p.S1659C	1
SNV	chr2	25273280	25273280	G	T	G>T	exonic	Anapc2	synonymous SNV	NM_175300	exon2	c.G528T	p.L176L	0
SNV	chr2	29176882	29176882	C	A	C>A	exonic	Setx	nonsynonymous SNV	NM_198033	exon24	c.C7034A	p.A2345E	0
SNV	chr2	32230733	32230733	C	T	C>T	exonic	Prrc2b	synonymous SNV	NM_001159634	exon32	c.C6684T	p.S2228S	0
SNV	chr2	35100635	35100635	G	A	G>A	exonic	AI182371	stopgain	NM_001243102	exon1	c.C19T	p.Q7X	5
SNV	chr2	35303232	35303232	C	T	C>T	exonic	Gsn	nonsynonymous SNV	NM_001206368	exon13	c.C1652T	p.A551V	6
SNV	chr2	35321569	35321569	C	G	C>G	exonic	Stom	nonsynonymous SNV	NM_013515	exon5	c.G439C	p.A147P	0
Indel	chr2	41268392	41268393	TG	-	TG>-	exonic	Lrp1b	frameshift deletion	NM_053011	exon31	c.5153_5154del	p.A1718Efs*6	0
SNV	chr2	69458418	69458418	G	A	G>A	exonic	Lrp2	synonymous SNV	NM_001081088	exon57	c.C11103T	p.C3701C	0
SNV	chr2	69550930	69550930	G	T	G>T	exonic	Lrp2	synonymous SNV	NM_001081088	exon3	c.C210A	p.G70G	0
SNV	chr2	76739025	76739025	C	A	C>A	exonic	Ttn	nonsynonymous SNV	NM_028004	exon154	c.G56542T	p.V18848F	2
SNV	chr2	76772486	76772486	G	A	G>A	exonic	Ttn	nonsynonymous SNV	NM_028004	exon123	c.C30410T	p.A10137V	2
SNV	chr2	76790818	76790818	G	C	G>C	exonic	Ttn	nonsynonymous SNV	NM_028004	exon91	c.C22192G	p.P7398A	2
SNV	chr2	76891324	76891324	C	T	C>T	exonic	Ttn	nonsynonymous SNV	NM_011652	exon69	c.G17353A	p.V5785I	1
SNV	chr2	76896935	76896935	C	T	C>T	exonic	Ttn	nonsynonymous SNV	NM_011652	exon60	c.G14639A	p.R4880K	1
SNV	chr2	82984522	82984522	C	A	C>A	exonic	Fsip2	nonsynonymous SNV	NM_001370266	exon17	c.C10592A	p.S3531Y	0
SNV	chr2	85648051	85648051	T	G	T>G	exonic	Olfr1002	nonsynonymous SNV	NM_146573	exon1	c.A269C	p.K90T	0
SNV	chr2	87192172	87192172	G	T	G>T	exonic	Olfr1112	nonsynonymous SNV	NM_146661	exon1	c.G484T	p.V162F	0
SNV	chr2	87949311	87949311	A	C	A>C	exonic	Olfr1156	synonymous SNV	NM_146817	exon1	c.T921G	p.S307S	0
SNV	chr2	88224250	88224250	A	C	A>C	exonic	Olfr1170	nonsynonymous SNV	NM_146532	exon1	c.T781G	p.Y261D	0
SNV	chr2	88339900	88339900	C	A	C>A	exonic	Olfr1176	nonsynonymous SNV	NM_146771	exon1	c.C334A	p.Q112K	0
SNV	chr2	89097603	89097603	C	A	C>A	exonic	Olfr1220	nonsynonymous SNV	NM_146900	exon1	c.G323T	p.G108V	0
SNV	chr2	89418223	89418223	G	T	G>T	exonic	Olfr1239	stopgain	NM_146970	exon1	c.C189A	p.Y63X	0
SNV	chr2	91772998	91772998	T	G	T>G	exonic	Ambra1	nonsynonymous SNV	NM_172669	exon7	c.T1326G	p.S442R	1
SNV	chr2	110265488	110265488	C	A	C>A	exonic	Bbox1	nonsynonymous SNV	NM_130452	exon7	c.G1130T	p.R377L	0
SNV	chr2	111257163	111257163	G	A	G>A	exonic	Olfr1276	nonsynonymous SNV	NM_146395	exon1	c.G47A	p.G16E	0
SNV	chr2	116063400	116063400	G	C	G>C	exonic	Meis2	stopgain	NM_001136072	exon2	c.C33G	p.Y11X	11
SNV	chr2	120713794	120713794	G	T	G>T	exonic	Stard9	nonsynonymous SNV	NM_001370940	exon31	c.G13465T	p.D4489Y	0
SNV	chr2	121098975	121098975	T	A	T>A	exonic	Tgm7	unknown					0
SNV	chr2	121303480	121303480	G	C	G>C	exonic	Map1a	nonsynonymous SNV	NM_001173506	exon4	c.G4062C	p.Q1354H	1
SNV	chr2	131308508	131308508	A	G	A>G	exonic	Rnf24	synonymous SNV	NM_178607	exon3	c.T153C	p.H51H	0
SNV	chr2	143964835	143964835	G	A	G>A	exonic	Rrbp1	synonymous SNV	NM_024281	exon8	c.C2862T	p.C954C	0
SNV	chr2	151504162	151504162	G	T	G>T	exonic	Nsfl1c	nonsynonymous SNV	NM_001291074	exon5	c.G496T	p.A166S	1
Indel	chr2	154627945	154627989	CCACCCCCTCCGCCTCTCCCCCCACCCCCCCAGCCTCCTCCTCCC	-	CCACCCCCTCCGCCTCTCCCCCCACCCCCCCAGCCTCCTCCTCCC>-	exonic	Zfp341	nonframeshift deletion	NM_199304	exon5	c.547_591del	p.P185_P199del	0
SNV	chr2	164892201	164892201	C	T	C>T	exonic	Zfp335	nonsynonymous SNV	NM_199027	exon28	c.G3977A	p.G1326D	0
SNV	chr2	174299144	174299144	G	C	G>C	exonic	Gnas	nonsynonymous SNV	NM_001077507	exon1	c.G1283C	p.G428A	4
Indel	chr2	174299153	174299153	-	CATAC	->CATAC	exonic	Gnas	frameshift insertion	NM_001077507	exon1	c.1292_1293insCATAC	p.T432Ifs*356	4
SNV	chr2	178283020	178283020	G	A	G>A	exonic	Phactr3	synonymous SNV	NM_001007154	exon6	c.G639A	p.A213A	4
SNV	chr2	180911360	180911360	C	T	C>T	exonic	Ythdf1	nonsynonymous SNV	NM_173761	exon4	c.G980A	p.R327H	0
Indel	chr3	38982256	38982256	G	-	G>-	exonic	Fat4	stopgain	NM_183221	exon9	c.10056delG	p.M3353*	0
SNV	chr3	38982258	38982258	T	A	T>A	exonic	Fat4	nonsynonymous SNV	NM_183221	exon9	c.T10058A	p.M3353K	0
SNV	chr3	68927772	68927772	C	T	C>T	exonic	Ift80	synonymous SNV	NM_026641	exon13	c.G1335A	p.A445A	0
SNV	chr3	82038060	82038060	A	G	A>G	exonic	Gucy1b1	nonsynonymous SNV	NM_001161796	exon10	c.T1270C	p.F424L	1
SNV	chr3	89367165	89367165	G	T	G>T	exonic	Dcst2	nonsynonymous SNV	NM_001370853	exon5	c.G711T	p.Q237H	0
SNV	chr3	90038969	90038969	C	A	C>A	exonic	Ubap2l	nonsynonymous SNV	NM_001165983	exon5	c.G327T	p.K109N	8
SNV	chr3	96145093	96145093	G	T	G>T	exonic	Otud7b	stopgain	NM_001025614	exon6	c.G730T	p.E244X	1
SNV	chr3	98104353	98104353	C	G	C>G	exonic	Notch2	nonsynonymous SNV	NM_010928	exon11	c.C1686G	p.F562L	0
SNV	chr3	100100323	100100323	C	A	C>A	exonic	Spag17	nonsynonymous SNV	NM_028892	exon41	c.C5808A	p.S1936R	0
SNV	chr3	107495807	107495807	G	T	G>T	exonic	Slc6a17	synonymous SNV	NM_001293689	exon3	c.C303A	p.P101P	1
SNV	chr3	108960265	108960265	G	A	G>A	exonic	Henmt1	nonsynonymous SNV	NM_001078646	exon8	c.G1115A	p.C372Y	1
SNV	chr3	109166426	109166426	C	G	C>G	exonic	Slc25a24	nonsynonymous SNV	NM_172685	exon10	c.C1344G	p.N448K	0
SNV	chr3	130630520	130630520	C	T	C>T	exonic	Etnppl	nonsynonymous SNV	NM_027907	exon9	c.C940T	p.P314S	1
SNV	chr3	144201866	144201866	G	A	G>A	exonic	Lmo4	synonymous SNV	NM_001161770	exon1	c.C183T	p.G61G	2
SNV	chr4	11785132	11785132	T	A	T>A	exonic	Cdh17	nonsynonymous SNV	NM_019753	exon9	c.T923A	p.F308Y	0
SNV	chr4	113626618	113626618	C	T	C>T	exonic	Skint5	nonsynonymous SNV	NM_001167876	exon37	c.G2774A	p.R925K	1
SNV	chr4	123297953	123297953	C	A	C>A	exonic	Pabpc4	nonsynonymous SNV	NM_001356377	exon13	c.C1768A	p.L590M	2
SNV	chr4	136995413	136995413	G	A	G>A	exonic	Zbtb40	stopgain	NM_198248	exon12	c.C2353T	p.Q785X	0
Indel	chr4	138240661	138240663	GAC	-	GAC>-	exonic	Hp1bp3	nonframeshift deletion	NM_001122896	exon11	c.1180_1182del	p.D395del	8
Indel	chr4	138240667	138240669	GAA	-	GAA>-	exonic	Hp1bp3	nonframeshift deletion	NM_001122896	exon11	c.1186_1188del	p.E396del	8
SNV	chr4	146124343	146124343	A	C	A>C	exonic	Zfp987	nonsynonymous SNV	NM_001037926	exon4	c.A344C	p.N115T	0
Indel	chr4	148671394	148671395	GG	-	GG>-	exonic	Gm572	frameshift deletion	NM_001085505	exon11	c.1166_1167del	p.V393Gfs*42	0
SNV	chr4	153432839	153432839	C	T	C>T	exonic	Ajap1	nonsynonymous SNV	NM_001099299	exon2	c.G44A	p.R15H	0
SNV	chr4	156240649	156240649	C	T	C>T	exonic	Noc2l	nonsynonymous SNV	NM_001369270	exon9	c.C479T	p.A160V	1
SNV	chr5	6770073	6770073	C	G	C>G	exonic	Zfp804b	nonsynonymous SNV	NM_001163223	exon4	c.G2989C	p.D997H	0
SNV	chr5	14677416	14677416	C	A	C>A	exonic	Pclo	nonsynonymous SNV	NM_001110796	exon5	c.C6287A	p.S2096Y	1
SNV	chr5	14714115	14714115	T	C	T>C	exonic	Pclo	nonsynonymous SNV	NM_001110796	exon7	c.T12601C	p.S4201P	1
DNP	chr5	34551647	34551648	CG	GC	CG>GC	exonic	Sh3bp2	nonframeshift substitution	NM_001145858	exon2	c.215_216delinsGC	p.A72G	2
Indel	chr5	37370823	37370823	-	CGGCATAC	->CGGCATAC	exonic	Evc2	frameshift insertion	NM_145920	exon8	c.1175_1176insCGGCATAC	p.E392Dfs*6	0
SNV	chr5	39614561	39614561	G	T	G>T	exonic	Hs3st1	nonsynonymous SNV	NM_010474	exon2	c.C738A	p.N246K	0
SNV	chr5	52741819	52741819	C	A	C>A	exonic	Pi4k2b	nonsynonymous SNV	NM_025951	exon1	c.C101A	p.A34E	1
SNV	chr5	69110368	69110368	C	G	C>G	exonic	Kctd8	nonsynonymous SNV	NM_175519	exon2	c.G1398C	p.W466C	0
SNV	chr5	74585062	74585062	A	G	A>G	exonic	Fip1l1	synonymous SNV	NM_024183	exon12	c.A1011G	p.V337V	3
SNV	chr5	111454711	111454711	C	T	C>T	exonic	Mn1	nonsynonymous SNV	NM_001081235	exon3	c.C3814T	p.R1272C	0
SNV	chr5	112354995	112354995	T	C	T>C	exonic	Gm6583	nonsynonymous SNV	NM_001039228	exon1	c.A842G	p.Q281R	0
SNV	chr5	117695459	117695459	C	A	C>A	exonic	Ksr2	nonsynonymous SNV	NM_001312914	exon10	c.C1606A	p.P536T	0
SNV	chr5	121315035	121315035	C	T	C>T	exonic	Hectd4	nonsynonymous SNV	NM_181421	exon36	c.C5615T	p.P1872L	0
SNV	chr5	123531175	123531175	G	A	G>A	exonic	Vps33a	synonymous SNV	NM_001359513	exon12	c.C1524T	p.G508G	1
SNV	chr5	123558762	123558762	C	A	C>A	exonic	Vps33a	nonsynonymous SNV	NM_001359513	exon7	c.G827T	p.G276V	1
SNV	chr5	123700654	123700654	G	A	G>A	exonic	Zcchc8	nonsynonymous SNV	NM_027494	exon14	c.C1820T	p.A607V	0
SNV	chr5	124283641	124283641	G	A	G>A	exonic	Mphosph9	nonsynonymous SNV	NM_001081323	exon14	c.C2236T	p.R746W	1
SNV	chr5	140524637	140524637	G	C	G>C	exonic	Chst12	nonsynonymous SNV	NM_021528	exon2	c.G1018C	p.D340H	0
Indel	chr5	144997059	144997059	G	-	G>-	exonic	Kpna7	frameshift deletion	NM_001347531	exon7	c.886delC	p.H296Ifs*4	1
SNV	chr5	147274564	147274564	T	G	T>G	exonic	Pdx1	synonymous SNV	NM_008814	exon2	c.T594G	p.R198R	0
SNV	chr5	147430912	147430912	C	A	C>A	exonic	Pan3	synonymous SNV	NM_028291	exon1	c.C333A	p.G111G	0
SNV	chr6	34857697	34857697	C	A	C>A	exonic	Agbl3	nonsynonymous SNV	NM_001289657	exon19	c.C2086A	p.Q696K	2
SNV	chr6	85484212	85484212	G	A	G>A	exonic	Fbxo41	synonymous SNV	NM_001289674	exon2	c.C513T	p.P171P	2
SNV	chr6	85628114	85628114	G	T	G>T	exonic	Alms1	nonsynonymous SNV	NM_145223	exon10	c.G5338T	p.G1780C	0
SNV	chr6	91031691	91031691	A	G	A>G	exonic	Nup210	nonsynonymous SNV	NM_018815	exon29	c.T3866C	p.L1289P	0
SNV	chr6	97112160	97112160	G	C	G>C	exonic	Eogt	nonsynonymous SNV	NM_175313	exon18	c.C1484G	p.S495C	0
SNV	chr6	121031044	121031044	C	T	C>T	exonic	Mical3	nonsynonymous SNV	NM_001270475	exon10	c.G1402A	p.V468I	1
SNV	chr6	127657924	127657924	G	T	G>T	exonic	Cracr2a	nonsynonymous SNV	NM_001368877	exon16	c.G1917T	p.E639D	0
SNV	chr6	129467534	129467534	C	A	C>A	exonic	Clec7a	nonsynonymous SNV	NM_001309637	exon3	c.G337T	p.D113Y	0
SNV	chr6	140583915	140583915	G	C	G>C	exonic	Plekha5	nonsynonymous SNV	NM_144920	exon26	c.G3102C	p.L1034F	0
SNV	chr6	148809915	148809915	A	T	A>T	exonic	Ipo8	nonsynonymous SNV	NM_001081113	exon8	c.T874A	p.F292I	0
SNV	chr7	3716812	3716812	A	T	A>T	exonic	Pirb	nonsynonymous SNV	NM_001357394	exon7	c.T1334A	p.F445Y	1
SNV	chr7	4707906	4707906	G	A	G>A	exonic	Brsk1	nonsynonymous SNV	NM_001003920	exon15	c.G1726A	p.A576T	0
SNV	chr7	4794489	4794489	C	G	C>G	exonic	Rpl28	synonymous SNV	NM_009081	exon5	c.C396G	p.R132R	0
SNV	chr7	5301004	5301004	C	A	C>A	exonic	Nlrp2	nonsynonymous SNV	NM_177690	exon11	c.G2906T	p.S969I	0
SNV	chr7	9976248	9976248	A	G	A>G	exonic	Vmn2r49	synonymous SNV	NM_001105156	exon6	c.T2556C	p.F852F	0
SNV	chr7	16134306	16134306	C	A	C>A	exonic	Slc8a2	nonsynonymous SNV	NM_001347561	exon2	c.C462A	p.N154K	1
SNV	chr7	21012226	21012226	G	T	G>T	exonic	Vmn1r119	nonsynonymous SNV	NM_001166708	exon1	c.C230A	p.A77D	0
SNV	chr7	24611414	24611414	C	T	C>T	exonic	Phldb3	stopgain	NM_001102613	exon1	c.C70T	p.Q24X	0
SNV	chr7	25226299	25226299	C	T	C>T	exonic	Zfp526	nonsynonymous SNV	NM_175436	exon3	c.C1982T	p.A661V	0
SNV	chr7	28181616	28181616	G	T	G>T	exonic	Dyrk1b	nonsynonymous SNV	NM_001037957	exon2	c.G7T	p.V3F	2
SNV	chr7	29053064	29053064	G	A	G>A	exonic	Ryr1	stopgain	NM_009109	exon73	c.C10825T	p.Q3609X	0
SNV	chr7	29244120	29244120	C	A	C>A	exonic	Yif1b	nonsynonymous SNV	NM_001110201	exon2	c.C97A	p.Q33K	4
SNV	chr7	29339164	29339164	T	C	T>C	exonic	Sipa1l3	nonsynonymous SNV	NM_001081028	exon17	c.A4204G	p.R1402G	0
SNV	chr7	35043729	35043729	C	T	C>T	exonic	Pepd	nonsynonymous SNV	NM_008820	exon14	c.C1192T	p.R398C	0
SNV	chr7	45286996	45286996	G	T	G>T	exonic	Slc6a21	nonsynonymous SNV	NM_001033176	exon3	c.G397T	p.G133C	0
SNV	chr7	45524074	45524074	G	C	G>C	exonic	Ppp1r15a	nonsynonymous SNV	NM_008654	exon2	c.C1309G	p.P437A	0
SNV	chr7	45524084	45524084	T	G	T>G	exonic	Ppp1r15a	synonymous SNV	NM_008654	exon2	c.A1299C	p.P433P	0
SNV	chr7	45999092	45999092	C	T	C>T	exonic	Abcc6	nonsynonymous SNV	NM_018795	exon16	c.G1975A	p.V659I	0
SNV	chr7	56293766	56293766	C	A	C>A	exonic	Oca2	nonsynonymous SNV	NM_021879	exon7	c.C686A	p.A229E	0
SNV	chr7	68195621	68195621	A	G	A>G	exonic	Igf1r	nonsynonymous SNV	NM_010513	exon13	c.A2657G	p.Y886C	0
SNV	chr7	79089619	79089619	G	T	G>T	exonic	Acan	synonymous SNV	NM_001361500	exon6	c.G774T	p.A258A	1
SNV	chr7	85410258	85410258	T	C	T>C	exonic	Vmn2r69	nonsynonymous SNV	NM_001105182	exon4	c.A1442G	p.E481G	0
Indel	chr7	85410261	85410261	-	AA	->AA	exonic	Vmn2r69	frameshift insertion	NM_001105182	exon4	c.1438_1439insTT	p.S480Ffs*17	0
SNV	chr7	85559337	85559337	G	T	G>T	exonic	Vmn2r70	nonsynonymous SNV	NM_001384914	exon6	c.C1922A	p.T641N	0
SNV	chr7	104149296	104149296	A	T	A>T	exonic	Ubqlnl	nonsynonymous SNV	NM_198624	exon1	c.T993A	p.N331K	0
SNV	chr7	107967595	107967595	T	G	T>G	exonic	Olfr476	nonsynonymous SNV	NM_146924	exon1	c.T197G	p.L66R	0
SNV	chr7	141102089	141102089	G	A	G>A	exonic	Ano9	nonsynonymous SNV	NM_178381	exon23	c.C2146T	p.P716S	0
SNV	chr8	43185456	43185456	C	G	C>G	exonic	Triml2	nonsynonymous SNV	NM_001381929	exon4	c.C460G	p.Q154E	1
SNV	chr8	48342694	48342694	T	C	T>C	exonic	Tenm3	synonymous SNV	NM_001145937	exon8	c.A1560G	p.R520R	1
SNV	chr8	55872524	55872524	C	G	C>G	exonic	Adam29	nonsynonymous SNV	NM_175939	exon2	c.G894C	p.R298S	0
SNV	chr8	67491496	67491496	T	G	T>G	exonic	Nat1	nonsynonymous SNV	NM_008673	exon1	c.T523G	p.F175V	0
SNV	chr8	70836343	70836343	G	C	G>C	exonic	Arrdc2	nonsynonymous SNV	NM_027560	exon7	c.C1047G	p.S349R	0
SNV	chr8	81014188	81014188	A	C	A>C	exonic	Usp38	synonymous SNV	NM_027554	exon1	c.T249G	p.T83T	0
SNV	chr8	105141960	105141960	A	G	A>G	exonic	Ces4a	nonsynonymous SNV	NM_146213	exon3	c.A305G	p.Q102R	0
SNV	chr8	111056609	111056609	G	T	G>T	exonic	Exosc6	nonsynonymous SNV	NM_028274	exon1	c.G239T	p.G80V	0
SNV	chr8	111997614	111997614	G	T	G>T	exonic	Kars	synonymous SNV	NM_053092	exon11	c.C1380A	p.I460I	4
SNV	chr8	120028802	120028802	A	G	A>G	exonic	Crispld2	nonsynonymous SNV	NM_001310635	exon9	c.A914G	p.Q305R	1
SNV	chr9	4309355	4309355	G	C	G>C	exonic	Aasdhppt	nonsynonymous SNV	NM_001326359	exon1	c.C82G	p.P28A	1
SNV	chr9	15992306	15992306	G	T	G>T	exonic	Fat3	synonymous SNV	NM_001080814	exon11	c.C8904A	p.P2968P	0
SNV	chr9	15998870	15998870	G	C	G>C	exonic	Fat3	nonsynonymous SNV	NM_001080814	exon10	c.C5847G	p.H1949Q	0
SNV	chr9	18595403	18595403	G	C	G>C	exonic	Muc16	synonymous SNV	NM_001378248	exon21	c.C20139G	p.V6713V	0
SNV	chr9	20260665	20260665	G	C	G>C	exonic	Olfr872	nonsynonymous SNV	NM_146560	exon2	c.G824C	p.G275A	0
SNV	chr9	38180590	38180590	T	C	T>C	exonic	Olfr891	nonsynonymous SNV	NM_146478	exon1	c.A232G	p.T78A	0
SNV	chr9	44881227	44881227	G	A	G>A	exonic	Kmt2a	synonymous SNV	NM_001357549	exon1	c.C48T	p.T16T	0
SNV	chr9	53459753	53459753	A	C	A>C	exonic	Atm	nonsynonymous SNV	NM_007499	exon46	c.T6785G	p.V2262G	0
SNV	chr9	53552471	53552471	A	G	A>G	exonic	Npat	nonsynonymous SNV	NM_001081152	exon6	c.A553G	p.T185A	0
SNV	chr9	54331911	54331911	G	T	G>T	exonic	Gldn	nonsynonymous SNV	NM_177350	exon5	c.G576T	p.K192N	0
SNV	chr9	65838979	65838979	T	A	T>A	exonic	Trip4	nonsynonymous SNV	NM_001357872	exon13	c.A1634T	p.Q545L	1
SNV	chr9	70034675	70034675	G	A	G>A	exonic	Gcnt3	stopgain	NM_028087	exon3	c.C610T	p.Q204X	0
SNV	chr9	103500145	103500145	C	A	C>A	exonic	Tmem108	nonsynonymous SNV	NM_001359465	exon3	c.G104T	p.R35M	1
SNV	chr9	105782210	105782210	G	A	G>A	exonic	Col6a6	nonsynonymous SNV	NM_001102607	exon5	c.C1535T	p.T512I	1
SNV	chr9	111333700	111333700	C	A	C>A	exonic	Trank1	nonsynonymous SNV	NM_001164659	exon2	c.C413A	p.T138N	0
SNV	chr10	27155464	27155464	C	G	C>G	exonic	Lama2	nonsynonymous SNV	NM_008481	exon32	c.G4597C	p.V1533L	0
SNV	chr10	40007388	40007388	A	G	A>G	exonic	Mfsd4b1	nonsynonymous SNV	NM_144821	exon2	c.T65C	p.L22P	0
SNV	chr10	59350581	59350581	G	A	G>A	exonic	P4ha1	nonsynonymous SNV	NM_001316370	exon6	c.G641A	p.R214H	2
SNV	chr10	59355382	59355382	G	A	G>A	exonic	P4ha1	synonymous SNV	NM_001316370	exon8	c.G870A	p.T290T	1
SNV	chr10	62391426	62391426	C	T	C>T	exonic	Hkdc1	nonsynonymous SNV	NM_145419	exon16	c.G2251A	p.V751M	0
SNV	chr10	75646948	75646948	G	T	G>T	exonic	Cabin1	nonsynonymous SNV	NM_172549	exon36	c.C6347A	p.T2116N	0
SNV	chr10	78071905	78071905	A	C	A>C	exonic	Icosl	nonsynonymous SNV	NM_015790	exon3	c.A298C	p.N100H	0
SNV	chr10	79481518	79481518	G	A	G>A	exonic	Vmn2r83	nonsynonymous SNV	NM_001104537	exon5	c.G1594A	p.V532I	0
SNV	chr10	80544780	80544780	G	A	G>A	exonic	Rexo1	nonsynonymous SNV	NM_025852	exon8	c.C2720T	p.P907L	0
SNV	chr10	85912950	85912950	G	A	G>A	exonic	Prdm4	synonymous SNV	NM_181650	exon2	c.C21T	p.S7S	1
SNV	chr10	117278121	117278121	T	C	T>C	exonic	Lyz2	stoploss	NM_017372	exon4	c.A447G	p.X149W	0
SNV	chr10	117759200	117759200	C	T	C>T	exonic	Nup107	nonsynonymous SNV	NM_134010	exon24	c.G2237A	p.R746Q	0
SNV	chr10	128721225	128721225	G	A	G>A	exonic	Dgka	nonsynonymous SNV	NM_001372366	exon21	c.C1985T	p.A662V	4
SNV	chr11	33479250	33479250	A	C	A>C	exonic	Ranbp17	nonsynonymous SNV	NM_001362875	exon10	c.T994G	p.F332V	1
SNV	chr11	49113284	49113284	C	A	C>A	exonic	Olfr1396	synonymous SNV	NM_146337	exon1	c.G441T	p.G147G	0
SNV	chr11	58684537	58684537	C	G	C>G	exonic	Olfr320	synonymous SNV	NM_207230	exon1	c.C663G	p.V221V	0
SNV	chr11	59031647	59031647	C	A	C>A	exonic	Obscn	synonymous SNV	NM_001171512	exon70	c.G17706T	p.G5902G	1
SNV	chr11	59571149	59571149	G	A	G>A	exonic	Olfr222	nonsynonymous SNV	NM_001011789	exon1	c.C590T	p.T197M	0
SNV	chr11	59742041	59742041	G	A	G>A	exonic	Mprip	synonymous SNV	NM_001368931	exon9	c.G1443A	p.L481L	2
SNV	chr11	75469761	75469761	G	C	G>C	exonic	Tlcd2	nonsynonymous SNV	NM_027249	exon4	c.G629C	p.G210A	0
SNV	chr11	77515604	77515604	G	T	G>T	exonic	Abhd15	nonsynonymous SNV	NM_026185	exon1	c.G406T	p.A136S	0
SNV	chr11	77537954	77537954	A	G	A>G	exonic	Taok1	synonymous SNV	NM_144825	exon20	c.T2919C	p.A973A	2
SNV	chr11	82961364	82961364	A	G	A>G	exonic	Slfn5	nonsynonymous SNV	NM_183201	exon6	c.A2315G	p.Q772R	0
SNV	chr11	86233141	86233141	G	A	G>A	exonic	Ints2	nonsynonymous SNV	NM_001363130	exon13	c.C1880T	p.A627V	2
SNV	chr11	87240658	87240658	A	G	A>G	exonic	Ppm1e	nonsynonymous SNV	NM_177167	exon4	c.T908C	p.L303P	0
SNV	chr11	95375052	95375052	G	A	G>A	exonic	Fam117a	nonsynonymous SNV	NM_172543	exon4	c.G533A	p.C178Y	0
SNV	chr11	98436593	98436593	T	G	T>G	exonic	Erbb2	synonymous SNV	NM_001003817	exon27	c.T3696G	p.G1232G	0
SNV	chr11	98436607	98436607	C	A	C>A	exonic	Erbb2	nonsynonymous SNV	NM_001003817	exon27	c.C3710A	p.T1237N	0
SNV	chr11	98649213	98649213	G	T	G>T	exonic	Gsdma2	startloss	NM_001363220	exon2	c.G160T	p.V54L	2
SNV	chr11	100102857	100102857	C	T	C>T	exonic	Krt36	nonsynonymous SNV	NM_001174099	exon6	c.G1154A	p.R385Q	0
SNV	chr11	100712273	100712273	C	A	C>A	exonic	Kat2a	synonymous SNV	NM_001038010	exon1	c.G132T	p.P44P	1
SNV	chr11	102480846	102480846	T	C	T>C	exonic	Gpatch8	nonsynonymous SNV	NM_001159492	exon8	c.A1865G	p.E622G	0
SNV	chr11	103028628	103028628	G	A	G>A	exonic	Nmt1	nonsynonymous SNV	NM_008707	exon1	c.G57A	p.M19I	0
SNV	chr11	103604562	103604562	T	A	T>A	exonic	Gm884	synonymous SNV	NM_001033434	exon4	c.A1902T	p.I634I	0
SNV	chr11	110145597	110145597	C	G	C>G	exonic	Abca9	nonsynonymous SNV	NM_147220	exon13	c.G1685C	p.G562A	0
SNV	chr11	117772779	117772779	G	A	G>A	exonic	Tmc6	stopgain	NM_145439	exon13	c.C1606T	p.Q536X	0
SNV	chr11	117855244	117855244	A	C	A>C	exonic	Birc5	nonsynonymous SNV	NM_009689	exon4	c.A359C	p.K120T	0
SNV	chr11	120629319	120629319	T	G	T>G	exonic	Mafg	nonsynonymous SNV	NM_010756	exon3	c.A454C	p.T152P	0
