# Supplementary material
Source: Research Square preprint supplement (doi:10.21203/rs.3.rs-8991205/v1)
Supplement: Supplementary file 3 [file 622989d11aff124908e49070.xlsx]

## Sheet: EMT_Gene_Expression
Gene	Type	Weight	Weight_Z	NT2.5_logCPM	NT2.5LM_logCPM	NT2.5LV_logCPM	Log2FC_LM_vs_NT2.5	Log2FC_LV_vs_NT2.5	LM_Direction	LV_Direction
KRT19	Epithelial	2.37	12.68	-5.78167	-5.15395	-4.17458	0.627719	1.60709	Up	Up
AGR2	Epithelial	2.34	12.52	-7.21473	-7.21473	-7.21473	0	0	Down	Down
RAB25	Epithelial	2.31	12.37	6.26856	7.15219	6.68292	0.883625	0.414361	Up	Up
CDH1	Epithelial	2.09	11.12	8.6499	9.66578	9.5844	1.01588	0.934497	Up	Up
ERBB3	Epithelial	1.95	10.31	4.90659	5.90083	5.81977	0.994238	0.913172	Up	Up
FXYD3	Epithelial	1.91	10.1	1.27441	3.49284	5.01914	2.21843	3.74473	Up	Up
SLC44A4	Epithelial	1.86	9.84	1.93037	2.52247	1.43875	0.592093	-0.491629	Up	Down
SCNN1A	Epithelial	1.68	8.78	2.36461	1.42395	0.756027	-0.94066	-1.60859	Down	Down
GALNT3	Epithelial	1.67	8.75	7.24488	7.08269	7.42133	-0.162188	0.176447	Down	Up
PRSS8	Epithelial	1.61	8.39	3.63334	4.44451	3.5318	0.81117	-0.101539	Up	Down
ELF3	Epithelial	1.59	8.32	3.75621	3.4931	3.16218	-0.263112	-0.594036	Down	Down
TMPRSS4	Epithelial	1.56	8.14	1.89791	1.7984	1.1946	-0.0995122	-0.703306	Down	Down
CLDN7	Epithelial	1.56	8.14	6.95062	7.51381	7.62909	0.563188	0.678463	Up	Up
TACSTD2	Epithelial	1.56	8.1	8.83712	7.46707	8.135	-1.37005	-0.702118	Down	Down
CLDN3	Epithelial	1.54	8.03	7.88789	8.05763	8.27925	0.169739	0.391365	Up	Up
EPCAM	Epithelial	1.52	7.92	8.53827	9.35366	9.81391	0.815398	1.27565	Up	Up
SPINT1	Epithelial	1.46	7.56	6.97292	8.11473	7.71402	1.14181	0.741101	Up	Up
TSPAN1	Epithelial	1.43	7.41	-1.08525	2.27503	1.25937	3.36028	2.34462	Up	Up
PLS1	Epithelial	1.43	7.39	1.16547	3.2269	2.10742	2.06142	0.941943	Up	Up
TMEM30B	Epithelial	1.43	7.38	-7.21473	-7.21473	-7.21473	0	0	Down	Down
PRR15L	Epithelial	1.41	7.26	-0.0442548	-0.696792	-1.37427	-0.652538	-1.33002	Down	Down
KRT8	Epithelial	1.4	7.2	10.8323	9.72781	11.2663	-1.10453	0.433952	Down	Up
ST14	Epithelial	1.38	7.11	8.5336	8.68809	8.55961	0.154497	0.0260144	Up	Up
RBM47	Epithelial	1.37	7.03	4.9838	4.93953	5.00899	-0.0442695	0.0251858	Down	Up
S100A14	Epithelial	1.36	7.01	7.73752	6.09144	6.37056	-1.64607	-1.36695	Down	Down
NQO1	Epithelial	1.36	7	4.94356	-7.21473	-7.21473	-12.1583	-12.1583	Down	Down
TOX3	Epithelial	1.36	6.99	-7.21473	-7.21473	-7.21473	0	0	Down	Down
PTK6	Epithelial	1.35	6.95	-5.01829	-3.92009	-1.54643	1.09819	3.47185	Up	Up
TFF1	Epithelial	1.34	6.87	-7.21473	-7.21473	-7.21473	0	0	Down	Down
CLDN4	Epithelial	1.34	6.87	8.35631	10.5254	9.35697	2.1691	1.00066	Up	Up
GPRC5A	Epithelial	1.34	6.87	8.19184	5.99096	6.57398	-2.20088	-1.61786	Down	Down
TJP3	Epithelial	1.33	6.85	1.90129	4.81489	3.70293	2.9136	1.80164	Up	Up
KRT18	Epithelial	1.31	6.73	10.12	10.1411	11.1572	0.0211126	1.03719	Up	Up
MAP7	Epithelial	1.28	6.56	3.97783	5.41012	5.17041	1.43229	1.19258	Up	Up
ESRP1	Epithelial	1.27	6.47	6.94924	7.57756	7.29259	0.628322	0.343359	Up	Up
MUC1	Epithelial	1.25	6.4	-0.317685	-0.440846	-0.728197	-0.123161	-0.410512	Down	Down
SPINT2	Epithelial	1.23	6.25	7.26787	8.38403	7.92911	1.11616	0.661239	Up	Up
ESRP2	Epithelial	1.22	6.2	5.51316	5.76168	5.70985	0.24852	0.196688	Up	Up
CDS1	Epithelial	1.21	6.14	-5.73937	-7.21473	-7.21473	-1.47536	-1.47536	Down	Down
TTC39A	Epithelial	1.19	6.02	4.08272	3.81469	3.43841	-0.268032	-0.644308	Down	Down
OVOL2	Epithelial	1.17	5.9	2.35523	2.80646	2.72787	0.451226	0.372639	Up	Up
EHF	Epithelial	1.16	5.88	-3.87257	5.21383	5.06875	9.0864	8.94133	Up	Up
AP1M2	Epithelial	1.15	5.83	6.6163	6.54529	6.39186	-0.0710079	-0.224437	Down	Down
CEACAM5	Epithelial	1.14	5.75	-7.21473	-7.21473	-7.21473	0	0	Down	Down
LAD1	Epithelial	1.13	5.7	8.76762	8.58324	9.08794	-0.184377	0.320328	Down	Up
ARHGAP8	Epithelial	1.12	5.63	5.50952	4.88609	4.34311	-0.623435	-1.16641	Down	Down
TFF3	Epithelial	1.09	5.49	-7.21473	-7.21473	-7.21473	0	0	Down	Down
JUP	Epithelial	1.09	5.47	8.44696	9.3508	9.35787	0.90384	0.91091	Up	Up
TMC5	Epithelial	1.07	5.39	-5.73937	-7.21473	-6.44865	-1.47536	-0.709276	Down	Down
MLPH	Epithelial	1.07	5.38	-0.603247	3.11464	1.06623	3.71789	1.66947	Up	Up
ELMO3	Epithelial	1.06	5.33	4.28047	4.71784	4.57631	0.437365	0.295835	Up	Up
ERBB2	Epithelial	1.03	5.16	7.55921	9.76598	9.75181	2.20677	2.1926	Up	Up
LLGL2	Epithelial	1.02	5.11	5.57522	5.49344	4.72983	-0.0817759	-0.845393	Down	Down
DDR1	Epithelial	1.02	5.1	6.45066	7.42439	6.72222	0.973726	0.271563	Up	Up
FA2H	Epithelial	1.02	5.06	-7.21473	-4.81595	-7.21473	2.39878	0	Up	Down
CBLC	Epithelial	1	4.95	3.88733	4.08823	3.92336	0.200901	0.0360327	Up	Up
TMPRSS2	Epithelial	1	4.95	3.20435	5.9735	5.30411	2.76915	2.09977	Up	Up
LSR	Epithelial	0.99	4.93	5.12689	5.48259	5.78023	0.355708	0.653339	Up	Up
PERP	Epithelial	0.98	4.86	8.4921	8.86982	8.67874	0.377716	0.186634	Up	Up
POF1B	Epithelial	0.97	4.81	0.811767	4.68617	5.15879	3.87441	4.34702	Up	Up
MYO5C	Epithelial	0.97	4.8	-5.59489	-0.848971	-5.16066	4.74592	0.434237	Up	Up
RAB11FIP1	Epithelial	0.96	4.76	5.24564	5.42357	5.23828	0.177926	-0.00736908	Up	Down
MAPK13	Epithelial	0.96	4.75	6.71147	6.17313	6.23378	-0.538334	-0.477688	Down	Down
KRT7	Epithelial	0.96	4.74	10.4907	10.9014	11.5424	0.410719	1.0517	Up	Up
CEACAM1	Epithelial	0.95	4.69	-3.6704	2.84833	0.47049	6.51872	4.14089	Up	Up
CXADR	Epithelial	0.95	4.68	6.75317	7.67445	7.5595	0.921284	0.80633	Up	Up
ATP2C2	Epithelial	0.94	4.65	6.29039	5.79917	5.32603	-0.491222	-0.964358	Down	Down
RNF128	Epithelial	0.94	4.64	2.44871	3.03921	2.72011	0.590499	0.271395	Up	Up
MPZL2	Epithelial	0.94	4.61	5.24755	4.36374	4.49494	-0.883808	-0.752609	Down	Down
EPS8L1	Epithelial	0.93	4.58	3.64846	3.81848	3.1826	0.170023	-0.465859	Up	Down
GALNT7	Epithelial	0.91	4.45	5.88821	3.91971	4.22669	-1.9685	-1.66153	Down	Down
CORO2A	Epithelial	0.9	4.43	4.41564	3.77727	5.09022	-0.638376	0.674574	Down	Up
BCAS1	Epithelial	0.9	4.41	-6.12391	-5.55833	-4.36459	0.565581	1.75933	Up	Up
TPD52	Epithelial	0.89	4.36	7.68661	7.57512	7.9411	-0.11149	0.25449	Down	Up
ARHGAP32	Epithelial	0.87	4.26	5.00041	6.41581	5.71435	1.4154	0.713945	Up	Up
FUT2	Epithelial	0.87	4.25	3.1483	-3.21487	-7.21473	-6.36317	-10.363	Down	Down
GALE	Epithelial	0.86	4.16	4.28913	1.09467	3.77315	-3.19447	-0.515986	Down	Down
GRHL2	Epithelial	0.85	4.14	6.08309	6.24571	6.31268	0.162625	0.229591	Up	Up
BIK	Epithelial	0.85	4.1	-0.37871	2.81385	1.49605	3.19256	1.87476	Up	Up
RAPGEFL1	Epithelial	0.84	4.07	1.09651	1.73362	0.812252	0.637105	-0.284258	Up	Down
STYK1	Epithelial	0.84	4.05	4.03428	4.39117	4.30234	0.356889	0.268059	Up	Up
F11R	Epithelial	0.84	4.04	7.76896	7.79959	7.44587	0.0306302	-0.323097	Up	Down
PKP3	Epithelial	0.83	4.03	6.51227	6.23307	6.26201	-0.279196	-0.250263	Down	Down
CYB561	Epithelial	0.83	4.03	6.18988	6.19232	6.34375	0.00243799	0.153869	Up	Up
SH3YL1	Epithelial	0.82	3.95	3.76676	4.11487	3.87106	0.348106	0.104305	Up	Up
GDF15	Epithelial	0.81	3.93	-1.83102	-0.612936	-6.04617	1.21808	-4.21515	Up	Down
PSCA	Epithelial	0.81	3.92	-2.6345	-7.21473	-7.21473	-4.58022	-4.58022	Down	Down
EZR	Epithelial	0.81	3.88	9.31295	9.19136	8.98176	-0.121584	-0.33119	Down	Down
TJP2	Epithelial	0.8	3.87	7.77989	7.33171	7.62821	-0.448175	-0.151684	Down	Down
FGFR3	Epithelial	0.8	3.86	2.27445	-0.378455	0.0442375	-2.6529	-2.23021	Down	Down
BSPRY	Epithelial	0.8	3.84	3.04798	6.03151	5.68404	2.98353	2.63607	Up	Up
TOM1L1	Epithelial	0.8	3.82	5.43372	6.32862	6.32542	0.894899	0.891693	Up	Up
IRF6	Epithelial	0.78	3.74	6.07349	6.32102	5.92178	0.247526	-0.151714	Up	Down
EPB41L4B	Epithelial	0.78	3.74	3.78191	4.89489	4.83005	1.11299	1.04815	Up	Up
SPDEF	Epithelial	0.78	3.72	-5.73937	-7.21473	-7.21473	-1.47536	-1.47536	Down	Down
OCLN	Epithelial	0.77	3.7	4.28407	5.00054	4.96196	0.716471	0.677893	Up	Up
LRRC1	Epithelial	0.77	3.65	4.39133	4.42827	3.9537	0.0369436	-0.437628	Up	Down
ABHD11	Epithelial	0.75	3.57	4.90314	4.58169	4.54722	-0.321457	-0.355924	Down	Down
EPS8L2	Epithelial	0.75	3.55	5.79803	5.33776	5.03017	-0.460271	-0.76786	Down	Down
MYO6	Epithelial	0.75	3.55	4.38827	5.85386	4.57405	1.46558	0.18578	Up	Up
TSPAN8	Epithelial	0.74	3.53	-6.09117	-7.21473	-6.03646	-1.12355	0.0547127	Down	Up
MST1R	Epithelial	0.74	3.5	-7.21473	-7.21473	-7.21473	0	0	Down	Down
SLC16A5	Epithelial	0.74	3.5	-0.917928	-7.21473	-5.73448	-6.2968	-4.81655	Down	Down
AZGP1	Epithelial	0.73	3.47	-1.3122	-7.21473	-1.50858	-5.90253	-0.19638	Down	Down
TOB1	Epithelial	0.73	3.43	5.06396	5.36742	4.63691	0.303462	-0.427049	Up	Down
SLC35A3	Epithelial	0.72	3.42	6.10559	6.13012	6.36477	0.0245239	0.259181	Up	Up
TRPM4	Epithelial	0.72	3.42	4.44592	3.8051	4.0745	-0.640817	-0.371415	Down	Down
PHLDA2	Epithelial	0.72	3.42	3.53303	3.81473	3.52934	0.281707	-0.00368354	Up	Down
VAMP8	Epithelial	0.72	3.42	6.92237	7.09362	6.70869	0.171251	-0.213677	Up	Down
SLC22A18	Epithelial	0.72	3.42	-4.74677	2.93153	1.82685	7.67829	6.57362	Up	Up
AKR1B10	Epithelial	0.72	3.4	3.90971	4.06074	3.70611	0.151033	-0.203593	Up	Down
VAV3	Epithelial	0.72	3.38	4.17266	6.30025	5.65693	2.12759	1.48427	Up	Up
SPAG1	Epithelial	0.72	3.38	2.69128	1.9973	2.25918	-0.693976	-0.432095	Down	Down
ABCC3	Epithelial	0.72	3.37	3.10974	0.851151	1.11559	-2.25859	-1.99415	Down	Down
SYNGR2	Epithelial	0.72	3.37	6.83898	6.86002	6.93492	0.021041	0.0959447	Up	Up
STAP2	Epithelial	0.7	3.28	4.48725	5.22997	4.88214	0.742723	0.394895	Up	Up
PPL	Epithelial	0.7	3.27	5.75071	5.89481	5.70073	0.144099	-0.0499735	Up	Down
PLLP	Epithelial	0.7	3.26	-2.75953	-7.21473	-6.03646	-4.4552	-3.27694	Down	Down
DSG2	Epithelial	0.7	3.26	6.46472	7.92999	7.51371	1.46527	1.04899	Up	Up
HDHD3	Epithelial	0.69	3.25	2.43959	2.18349	2.07897	-0.256096	-0.360618	Down	Down
CD2AP	Epithelial	0.69	3.25	7.09343	7.05064	7.301	-0.0427892	0.207571	Down	Up
MANSC1	Epithelial	0.69	3.24	4.1932	5.94001	5.52618	1.7468	1.33298	Up	Up
DHCR24	Epithelial	0.69	3.24	6.05501	5.71704	6.6383	-0.337967	0.583289	Down	Up
EPN3	Epithelial	0.69	3.23	5.88987	5.3004	5.28759	-0.589465	-0.602277	Down	Down
TUFT1	Epithelial	0.69	3.22	4.27954	4.64025	3.87509	0.360706	-0.404451	Up	Down
GMDS	Epithelial	0.69	3.22	5.17193	4.82902	5.25982	-0.342913	0.0878933	Down	Up
EXPH5	Epithelial	0.68	3.18	1.46327	1.68542	1.77493	0.222152	0.311662	Up	Up
DSP	Epithelial	0.68	3.17	7.49372	7.83743	7.51199	0.343707	0.0182754	Up	Up
SDC4	Epithelial	0.68	3.17	7.41333	7.98472	7.93451	0.571386	0.521176	Up	Up
IL20RA	Epithelial	0.67	3.13	-7.21473	-7.21473	-7.21473	0	0	Down	Down
FAM174B	Epithelial	0.67	3.13	-7.21473	-4.04097	-2.04794	3.17376	5.16679	Up	Up
PTPRF	Epithelial	0.67	3.11	8.79279	9.18727	9.00521	0.394475	0.212412	Up	Up
SORD	Epithelial	0.67	3.1	5.07862	5.76475	4.53755	0.686129	-0.541077	Up	Down
GAS1	Mesenchymal	1.62	8.43	1.04282	2.70769	0.709014	1.66487	-0.333803	Up	Down
CXCL12	Mesenchymal	1.38	7.13	4.45876	0.965662	2.37045	-3.4931	-2.08831	Down	Down
ZEB1	Mesenchymal	1.28	6.56	0.655642	-4.10196	-0.731814	-4.7576	-1.38746	Down	Down
GLYR1	Mesenchymal	1.21	6.18	6.91437	6.81467	6.86167	-0.0996984	-0.0527041	Down	Down
FHL1	Mesenchymal	1.21	6.15	-1.59146	2.58659	1.67676	4.17805	3.26821	Up	Up
FERMT2	Mesenchymal	1.19	6.06	6.5819	6.72584	6.82219	0.143939	0.240293	Up	Up
FYN	Mesenchymal	1.15	5.84	6.47249	7.26305	5.94625	0.790558	-0.526244	Up	Down
WIPF1	Mesenchymal	1.15	5.8	6.53327	6.86332	6.29163	0.330046	-0.241645	Up	Down
CYP1B1	Mesenchymal	1.12	5.65	9.57686	8.49446	9.1526	-1.08241	-0.424262	Down	Down
SERPING1	Mesenchymal	1.12	5.63	-5.35591	-7.21473	-4.55577	-1.85882	0.800136	Down	Up
SERPINF1	Mesenchymal	1.09	5.48	3.97733	6.12026	5.18146	2.14293	1.20413	Up	Up
VCAM1	Mesenchymal	1.08	5.4	2.13673	3.49514	2.36926	1.3584	0.232524	Up	Up
MAP1B	Mesenchymal	1.07	5.39	7.63381	7.77323	7.72041	0.139422	0.086604	Up	Up
TCF4	Mesenchymal	1.06	5.33	4.6154	5.79422	5.97861	1.17881	1.3632	Up	Up
SRPX	Mesenchymal	1.06	5.31	-4.34078	-7.21473	-7.21473	-2.87395	-2.87395	Down	Down
EMP3	Mesenchymal	1.06	5.29	2.83015	-7.21473	-2.4527	-10.0449	-5.28285	Down	Down
DPT	Mesenchymal	1.05	5.24	-7.21473	-7.21473	-7.21473	0	0	Down	Down
CALD1	Mesenchymal	1.04	5.21	10.0264	9.3298	9.46707	-0.696577	-0.559307	Down	Down
PTGIS	Mesenchymal	1.02	5.11	-7.21473	-2.75626	-3.80762	4.45847	3.40711	Up	Up
VIM	Mesenchymal	1.01	5.04	9.29322	7.80402	9.64703	-1.4892	0.353811	Down	Up
CD163	Mesenchymal	1.01	5.04	-7.21473	3.24709	2.55776	10.4618	9.77249	Up	Up
FBN1	Mesenchymal	1.01	5.02	0.442885	1.61115	0.80148	1.16827	0.358594	Up	Up
FN1	Mesenchymal	1	4.94	-3.09798	-7.21473	-5.53663	-4.11675	-2.43865	Down	Down
FXYD6	Mesenchymal	0.98	4.86	-3.83327	4.86193	5.38458	8.6952	9.21786	Up	Up
IGF1	Mesenchymal	0.97	4.82	-4.26794	0.0631263	1.5654	4.33107	5.83334	Up	Up
NAP1L3	Mesenchymal	0.97	4.81	-7.21473	-0.901436	-2.67765	6.31329	4.53708	Up	Up
MRC1	Mesenchymal	0.96	4.74	0.665293	-0.684561	-4.36807	-1.34985	-5.03336	Down	Down
MS4A4A	Mesenchymal	0.94	4.65	-7.21473	-2.47663	-6.04617	4.73809	1.16856	Up	Up
DCN	Mesenchymal	0.94	4.64	-7.21473	-3.21902	0.00126132	3.99571	7.21599	Up	Up
LOX	Mesenchymal	0.92	4.53	-3.91614	-7.21473	-6.04617	-3.29859	-2.13002	Down	Down
RECK	Mesenchymal	0.92	4.53	1.88979	1.90232	1.5808	0.0125316	-0.308988	Up	Down
ANK2	Mesenchymal	0.92	4.53	-5.15317	0.889929	-2.41314	6.0431	2.74004	Up	Up
LY96	Mesenchymal	0.92	4.5	0.92818	1.87298	0.759207	0.944803	-0.168974	Up	Down
ZFPM2	Mesenchymal	0.91	4.46	-0.397218	-4.51829	-1.56852	-4.12107	-1.1713	Down	Down
CSRP2	Mesenchymal	0.91	4.45	3.28889	-2.27619	-4.24409	-5.56508	-7.53298	Down	Down
EFEMP1	Mesenchymal	0.9	4.44	-3.34253	-4.87542	-3.60199	-1.53288	-0.259459	Down	Down
RARRES2	Mesenchymal	0.9	4.38	-7.21473	-7.21473	-7.21473	0	0	Down	Down
PTPRC	Mesenchymal	0.89	4.34	-1.41722	-5.55833	-2.73527	-4.14111	-1.31805	Down	Down
PLEKHO1	Mesenchymal	0.89	4.33	3.29193	4.61232	4.40055	1.32039	1.10862	Up	Up
RGS2	Mesenchymal	0.89	4.32	4.25947	1.44189	-0.120159	-2.81758	-4.37963	Down	Down
F13A1	Mesenchymal	0.88	4.31	-3.41718	-7.21473	-4.8679	-3.79755	-1.45072	Down	Down
JAM2	Mesenchymal	0.87	4.25	4.01919	2.39715	3.85174	-1.62203	-0.167447	Down	Down
CHRDL1	Mesenchymal	0.87	4.22	-5.00036	-1.26941	-1.05504	3.73095	3.94532	Up	Up
TUBA1A	Mesenchymal	0.87	4.21	8.2857	6.30935	8.49959	-1.97635	0.213896	Down	Up
AP1S2	Mesenchymal	0.86	4.19	5.07901	4.0156	4.97145	-1.06341	-0.107559	Down	Down
MYLK	Mesenchymal	0.86	4.17	4.68188	2.72161	1.96473	-1.96027	-2.71715	Down	Down
DDR2	Mesenchymal	0.86	4.17	5.51753	1.88518	0.731346	-3.63235	-4.78618	Down	Down
DSE	Mesenchymal	0.86	4.17	-6.12391	-7.21473	-7.21473	-1.09081	-1.09081	Down	Down
SACS	Mesenchymal	0.86	4.17	4.86329	3.35382	4.37657	-1.50947	-0.48672	Down	Down
GLIPR1	Mesenchymal	0.86	4.16	4.47004	-1.00387	-3.5443	-5.47391	-8.01434	Down	Down
CXCL13	Mesenchymal	0.85	4.15	-7.21473	-7.21473	-7.21473	0	0	Down	Down
FLRT2	Mesenchymal	0.85	4.13	-1.45326	-5.15395	-7.21473	-3.70069	-5.76147	Down	Down
PTX3	Mesenchymal	0.85	4.12	-2.31447	-2.6241	-7.21473	-0.309627	-4.90025	Down	Down
AKT3	Mesenchymal	0.84	4.1	6.42292	6.81628	7.15639	0.393362	0.733465	Up	Up
COL6A2	Mesenchymal	0.84	4.07	4.58194	1.07434	-0.546252	-3.5076	-5.12819	Down	Down
DPYSL3	Mesenchymal	0.84	4.06	-4.61582	-4.2805	-2.82935	0.335323	1.78647	Up	Up
CDH11	Mesenchymal	0.83	4.04	-6.05084	-6.03925	-7.21473	0.0115933	-1.16389	Up	Down
PDZRN3	Mesenchymal	0.83	4.02	5.37472	5.64532	5.90929	0.270597	0.534572	Up	Up
ZEB2	Mesenchymal	0.83	4.01	1.81817	2.40558	2.62849	0.587412	0.810327	Up	Up
CCL2	Mesenchymal	0.83	4.01	-3.83647	0.932101	0.372443	4.76857	4.20892	Up	Up
MAFB	Mesenchymal	0.83	3.99	-1.83412	-2.55416	-3.3778	-0.720047	-1.54369	Down	Down
SFRP1	Mesenchymal	0.82	3.98	5.04988	5.83218	6.85098	0.782302	1.8011	Up	Up
MFAP4	Mesenchymal	0.82	3.96	-6.05084	-7.21473	-7.21473	-1.16389	-1.16389	Down	Down
MAF	Mesenchymal	0.82	3.95	0.552192	1.6141	0.545915	1.06191	-0.00627683	Up	Down
UCHL1	Mesenchymal	0.82	3.94	-4.431	0.92621	1.11484	5.35721	5.54585	Up	Up
TUBB6	Mesenchymal	0.82	3.93	9.11008	8.42235	9.77503	-0.687729	0.664951	Down	Up
SRGN	Mesenchymal	0.81	3.91	-7.21473	-1.19072	-1.79991	6.02401	5.41482	Up	Up
HEG1	Mesenchymal	0.81	3.91	4.85241	6.78212	6.17316	1.92971	1.32075	Up	Up
KCNJ8	Mesenchymal	0.8	3.86	-7.21473	-7.21473	-7.21473	0	0	Down	Down
AKAP12	Mesenchymal	0.8	3.85	4.90224	5.92636	5.27374	1.02412	0.371496	Up	Up
EVI2A	Mesenchymal	0.8	3.84	2.17084	-7.21473	-5.28015	-9.38556	-7.45098	Down	Down
COL14A1	Mesenchymal	0.8	3.84	-6.05084	-0.0948022	-4.09224	5.95604	1.9586	Up	Up
AXL	Mesenchymal	0.8	3.82	-0.946331	1.78684	3.1289	2.73317	4.07523	Up	Up
ECM2	Mesenchymal	0.79	3.81	-3.69251	-7.21473	-4.8679	-3.52222	-1.17539	Down	Down
FSTL1	Mesenchymal	0.79	3.79	-4.46109	-7.21473	-4.8679	-2.75364	-0.406813	Down	Down
PLN	Mesenchymal	0.79	3.77	-7.21473	-7.21473	-7.21473	0	0	Down	Down
MYL9	Mesenchymal	0.79	3.77	-7.21473	-7.21473	-7.21473	0	0	Down	Down
OLFML3	Mesenchymal	0.78	3.76	2.66125	-0.347294	1.29007	-3.00855	-1.37118	Down	Down
STON1	Mesenchymal	0.78	3.75	5.29538	4.5814	4.70851	-0.713982	-0.586872	Down	Down
SLIT2	Mesenchymal	0.78	3.75	-7.21473	-7.21473	-7.21473	0	0	Down	Down
BICC1	Mesenchymal	0.78	3.75	-7.21473	-7.21473	-3.03544	0	4.17929	Down	Up
SOBP	Mesenchymal	0.78	3.75	-4.11884	-5.15395	-4.45336	-1.03511	-0.334515	Down	Down
CLIC4	Mesenchymal	0.78	3.74	7.84632	6.7763	6.83908	-1.07003	-1.00724	Down	Down
ENPP2	Mesenchymal	0.78	3.73	1.42897	4.98697	3.00983	3.558	1.58085	Up	Up
SAMSN1	Mesenchymal	0.78	3.72	-7.21473	-0.868818	-2.05586	6.34591	5.15886	Up	Up
TPM2	Mesenchymal	0.77	3.7	5.77748	0.138377	2.64159	-5.6391	-3.13589	Down	Down
ASPN	Mesenchymal	0.77	3.7	-3.58223	-5.15395	-7.21473	-1.57172	-3.6325	Down	Down
COL6A1	Mesenchymal	0.77	3.69	6.16438	2.49118	0.81739	-3.67321	-5.34699	Down	Down
IGFBP5	Mesenchymal	0.77	3.68	5.21271	5.58197	3.07082	0.369261	-2.14189	Up	Down
MOXD1	Mesenchymal	0.77	3.68	-6.05084	-2.11951	-0.248377	3.93133	5.80246	Up	Up
SLC2A3	Mesenchymal	0.77	3.67	-3.83647	-1.58507	-6.33	2.2514	-2.49352	Up	Down
OLFML2B	Mesenchymal	0.77	3.65	-0.122878	-5.61365	-4.07252	-5.49078	-3.94965	Down	Down
ANGPTL2	Mesenchymal	0.76	3.64	7.78428	6.46309	7.28567	-1.32119	-0.498611	Down	Down
PCOLCE	Mesenchymal	0.76	3.62	7.40143	4.24774	5.11238	-3.1537	-2.28905	Down	Down
COLEC12	Mesenchymal	0.76	3.62	-7.21473	-7.21473	-5.48787	0	1.72686	Down	Up
CTSK	Mesenchymal	0.76	3.62	-3.13535	-7.21473	-5.63162	-4.07938	-2.49627	Down	Down
TAGLN	Mesenchymal	0.76	3.6	-3.42884	-2.93599	-4.2724	0.492851	-0.843562	Up	Down
CDH2	Mesenchymal	0.76	3.6	-1.32052	-7.21473	-6.03646	-5.89421	-4.71595	Down	Down
IL10RA	Mesenchymal	0.76	3.6	-7.21473	-7.21473	-7.21473	0	0	Down	Down
CEP170	Mesenchymal	0.76	3.59	7.27358	6.25612	6.89074	-1.01746	-0.38284	Down	Down
TNS1	Mesenchymal	0.75	3.59	4.46315	5.12743	4.79197	0.664278	0.32882	Up	Up
JAM3	Mesenchymal	0.75	3.57	-3.03866	-7.21473	-5.85551	-4.17607	-2.81685	Down	Down
GREM1	Mesenchymal	0.75	3.55	-4.18879	-7.21473	-6.03646	-3.02594	-1.84767	Down	Down
VCAN	Mesenchymal	0.75	3.54	-1.67353	-0.785059	-1.89214	0.888467	-0.218614	Up	Down
ZCCHC24	Mesenchymal	0.75	3.54	4.97947	5.97869	5.58926	0.999216	0.609785	Up	Up
CRYAB	Mesenchymal	0.75	3.54	8.29232	7.39905	7.19201	-0.893273	-1.10031	Down	Down
SFRP4	Mesenchymal	0.74	3.53	-5.26991	-4.87542	-7.21473	0.394499	-1.94481	Up	Down
RUNX1T1	Mesenchymal	0.74	3.52	-6.05084	-7.21473	-7.21473	-1.16389	-1.16389	Down	Down
FGL2	Mesenchymal	0.74	3.51	-7.21473	-7.21473	-7.21473	0	0	Down	Down
GIMAP4	Mesenchymal	0.73	3.48	0.550945	-1.00566	0.286686	-1.5566	-0.264259	Down	Down
TWIST1	Mesenchymal	0.73	3.48	-7.21473	-7.21473	-7.21473	0	0	Down	Down
GFPT2	Mesenchymal	0.73	3.47	-6.12391	-3.4945	-5.72434	2.62941	0.399579	Up	Up
LHFP	Mesenchymal	0.73	3.47	7.0024	6.4081	6.55777	-0.594303	-0.444637	Down	Down
CXCR4	Mesenchymal	0.73	3.47	-7.21473	-7.21473	-7.21473	0	0	Down	Down
SPOCK1	Mesenchymal	0.73	3.46	-5.73937	-7.21473	-6.03646	-1.47536	-0.297088	Down	Down
SPARC	Mesenchymal	0.73	3.46	9.26987	8.20497	8.61028	-1.0649	-0.659597	Down	Down
VSIG4	Mesenchymal	0.73	3.44	-7.21473	-7.21473	-7.21473	0	0	Down	Down
GPM6B	Mesenchymal	0.72	3.42	-2.38147	-5.15395	-5.72434	-2.77248	-3.34286	Down	Down
TRPC1	Mesenchymal	0.72	3.41	-6.05084	-7.21473	-7.21473	-1.16389	-1.16389	Down	Down
SNAI2	Mesenchymal	0.72	3.39	-2.47339	-5.55833	-4.69298	-3.08494	-2.21959	Down	Down
PLXNC1	Mesenchymal	0.71	3.36	-1.68411	-0.98053	-2.36045	0.703581	-0.676343	Up	Down
SYT11	Mesenchymal	0.71	3.36	2.19475	2.27928	2.30215	0.0845275	0.107397	Up	Up
FLI1	Mesenchymal	0.71	3.36	-7.21473	-7.21473	-5.31512	0	1.8996	Down	Up
MYH10	Mesenchymal	0.71	3.35	8.01992	7.76674	8.00471	-0.25318	-0.0152098	Down	Down
CSF2RB	Mesenchymal	0.71	3.34	1.31533	3.3365	1.2146	2.02117	-0.100725	Up	Down
TNC	Mesenchymal	0.71	3.34	6.9328	8.72587	7.86924	1.79307	0.936434	Up	Up
PMP22	Mesenchymal	0.71	3.34	-0.170915	1.62739	0.18415	1.79831	0.355065	Up	Up
COL5A2	Mesenchymal	0.71	3.34	-0.1674	0.665748	1.58861	0.833148	1.75601	Up	Up
MMP2	Mesenchymal	0.71	3.33	2.53822	3.11269	1.38287	0.574468	-1.15535	Up	Down
GNG11	Mesenchymal	0.71	3.33	-7.21473	-7.21473	-4.55577	0	2.65895	Down	Up
CAV1	Mesenchymal	0.71	3.31	7.37157	3.78824	4.57723	-3.58333	-2.79434	Down	Down
CDK14	Mesenchymal	0.7	3.3	6.30163	6.24818	6.30143	-0.0534463	-0.000200905	Down	Down
SDC2	Mesenchymal	0.7	3.3	6.28739	6.37309	6.43265	0.0856989	0.145259	Up	Up
PTGDS	Mesenchymal	0.7	3.3	-5.41736	0.313839	-6.03646	5.7312	-0.619104	Up	Down
NR3C1	Mesenchymal	0.7	3.29	6.92471	7.02896	6.64767	0.104252	-0.277039	Up	Down
SYNM	Mesenchymal	0.7	3.29	0.778329	2.76704	1.56052	1.98871	0.782187	Up	Up
FAP	Mesenchymal	0.7	3.28	-5.73937	-7.21473	-6.03646	-1.47536	-0.297088	Down	Down
NUAK1	Mesenchymal	0.7	3.28	6.76999	7.27962	7.15545	0.509633	0.385456	Up	Up
WWTR1	Mesenchymal	0.7	3.26	6.95424	7.57262	7.71384	0.618383	0.759601	Up	Up
FBLN1	Mesenchymal	0.7	3.26	-7.21473	-2.6491	-4.95826	4.56563	2.25647	Up	Up
MPDZ	Mesenchymal	0.69	3.23	5.28758	5.96398	5.91608	0.676409	0.628505	Up	Up
SYNE1	Mesenchymal	0.69	3.23	4.993	6.17536	5.4931	1.18236	0.500093	Up	Up
EFEMP2	Mesenchymal	0.69	3.22	7.35662	6.69533	6.92822	-0.661282	-0.428392	Down	Down
GIMAP6	Mesenchymal	0.69	3.2	-7.21473	-7.21473	-7.21473	0	0	Down	Down
CCL8	Mesenchymal	0.69	3.2	-7.21473	-7.21473	-7.21473	0	0	Down	Down
COL15A1	Mesenchymal	0.69	3.2	-1.17109	-1.21588	-1.93814	-0.0447913	-0.767051	Down	Down
CHN1	Mesenchymal	0.68	3.2	0.366139	3.16661	2.31367	2.80047	1.94753	Up	Up
CRISPLD2	Mesenchymal	0.68	3.19	6.04396	3.13178	3.42494	-2.91218	-2.61903	Down	Down
PDGFC	Mesenchymal	0.68	3.18	5.63569	6.31987	5.86453	0.684183	0.228839	Up	Up
GEM	Mesenchymal	0.68	3.17	-5.5519	-7.21473	-7.21473	-1.66283	-1.66283	Down	Down
ISLR	Mesenchymal	0.68	3.14	-7.21473	-7.21473	-7.21473	0	0	Down	Down
GZMK	Mesenchymal	0.67	3.14	-7.21473	-7.21473	-7.21473	0	0	Down	Down
SPARCL1	Mesenchymal	0.67	3.14	-2.71419	-4.51829	1.79575	-1.8041	4.50994	Down	Up
BNC2	Mesenchymal	0.67	3.12	-7.21473	-7.21473	-7.21473	0	0	Down	Down
BGN	Mesenchymal	0.67	3.12	-1.81512	-1.52368	-2.58859	0.29144	-0.773467	Up	Down
MEOX2	Mesenchymal	0.67	3.1	-7.21473	-7.21473	-7.21473	0	0	Down	Down
ITM2A	Mesenchymal	0.67	3.1	-7.21473	-1.21627	-6.04617	5.99846	1.16856	Up	Up
IFFO1	Mesenchymal	0.67	3.1	-3.1583	-3.92009	-5.63162	-0.761796	-2.47333	Down	Down

## Sheet: Summary_Statistics
Category	Value
Total Genes	291
Epithelial Genes	133
Mesenchymal Genes	158
LM - Epithelial Up	78
LM - Epithelial Down	47
LM - Epithelial Mean Log2FC	0.225
LM - Epithelial p-value	1.3323e-02
LM - Mesenchymal Up	67
LM - Mesenchymal Down	69
LM - Mesenchymal Mean Log2FC	-0.115
LM - Mesenchymal p-value	3.8373e-01
LV - Epithelial Up	71
LV - Epithelial Down	53
LV - Epithelial Mean Log2FC	0.093
LV - Epithelial p-value	1.6560e-01
LV - Mesenchymal Up	58
LV - Mesenchymal Down	82
LV - Mesenchymal Mean Log2FC	-0.166
LV - Mesenchymal p-value	1.5360e-01

## Sheet: TCGA_breast_primary_only_EMT_sc
Sample_ID	Tissue	EMT_Score
TCGA-AR-A5QQ-01	Primary	-0.181484
TCGA-D8-A1JA-01	Primary	0.283815
TCGA-BH-A0BQ-01	Primary	-0.158435
TCGA-BH-A0BT-01	Primary	0.267604
TCGA-A8-A06X-01	Primary	0.286474
TCGA-A8-A096-01	Primary	-0.118921
TCGA-BH-A0C7-01	Primary	0.286221
TCGA-AC-A5XU-01	Primary	0.158055
TCGA-PE-A5DE-01	Primary	0.194022
TCGA-PE-A5DC-01	Primary	0.315476
TCGA-AR-A0TV-01	Primary	0.296733
TCGA-GM-A3XG-01	Primary	0.253799
TCGA-BH-A18J-01	Primary	0.202634
TCGA-BH-A0W7-01	Primary	0.120061
TCGA-E9-A3QA-01	Primary	-0.0978977
TCGA-A7-A4SD-01	Primary	-0.124493
TCGA-BH-A0HA-01	Primary	-0.0720618
TCGA-AR-A5QN-01	Primary	0.20732
TCGA-A7-A0CE-01	Primary	0.161474
TCGA-AR-A0U1-01	Primary	0.401976
TCGA-EW-A1OZ-01	Primary	0.233789
TCGA-A2-A0EY-01	Primary	0.294706
TCGA-A8-A09R-01	Primary	0.190856
TCGA-LL-A440-01	Primary	-0.286221
TCGA-BH-A8FY-01	Primary	0.510512
TCGA-E2-A1II-01	Primary	-0.179965
TCGA-A7-A6VX-01	Primary	0.198075
TCGA-C8-A273-01	Primary	0.296733
TCGA-BH-A1EO-01	Primary	-0.160208
TCGA-OL-A5RX-01	Primary	0.294453
TCGA-BH-A0B9-01	Primary	0.150709
TCGA-EW-A1P5-01	Primary	0.315096
TCGA-AO-A03P-01	Primary	0.260638
TCGA-AN-A0AS-01	Primary	0.109929
TCGA-A2-A1G0-01	Primary	0.144377
TCGA-B6-A0I8-01	Primary	0.405395
TCGA-A7-A4SA-01	Primary	0.155648
TCGA-AR-A24S-01	Primary	-0.141971
TCGA-LD-A74U-01	Primary	-0.127913
TCGA-D8-A1XA-01	Primary	0.295593
TCGA-D8-A1XR-01	Primary	0.363349
TCGA-A8-A07Z-01	Primary	0.391211
TCGA-E2-A1IJ-01	Primary	-0.081307
TCGA-GM-A2DH-01	Primary	0.16502
TCGA-BH-A0AY-01	Primary	-0.130319
TCGA-BH-A42V-01	Primary	-0.114995
TCGA-B6-A0IH-01	Primary	-0.122974
TCGA-A1-A0SH-01	Primary	-0.104357
TCGA-AR-A1AQ-01	Primary	-0.158435
TCGA-A7-A0DC-01	Primary	0.486196
TCGA-A8-A07P-01	Primary	0.321682
TCGA-A1-A0SN-01	Primary	0.253293
TCGA-BH-A18T-01	Primary	0.181231
TCGA-E9-A22B-01	Primary	0.143617
TCGA-S3-AA10-01	Primary	-0.133992
TCGA-AO-A0J9-01	Primary	-0.132979
TCGA-A1-A0SE-01	Primary	0.199721
TCGA-OL-A5RV-01	Primary	0.390324
TCGA-A2-A04U-01	Primary	-0.110816
TCGA-A2-A3XV-01	Primary	0.334473
TCGA-A7-A3IZ-01	Primary	0.352204
TCGA-D8-A1Y2-01	Primary	-0.168946
TCGA-E9-A229-01	Primary	-0.0702888
TCGA-A7-A4SB-01	Primary	0.263804
TCGA-BH-A0HK-01	Primary	0.239742
TCGA-3C-AAAU-01	Primary	0.394883
TCGA-E2-A14Z-01	Primary	-0.110436
TCGA-A2-A3XW-01	Primary	0.200861
TCGA-D8-A1Y1-01	Primary	-0.111322
TCGA-AC-A7VB-01	Primary	0.485309
TCGA-B6-A0RO-01	Primary	0.434017
TCGA-A2-A04P-01	Primary	-0.150583
TCGA-A7-A13E-01	Primary	0.236702
TCGA-A7-A0D9-01	Primary	0.264944
TCGA-E2-A14R-01	Primary	0.235562
TCGA-GM-A3XN-01	Primary	-0.10499
TCGA-A8-A06Y-01	Primary	0.424899
TCGA-E2-A1IK-01	Primary	0.367021
TCGA-E2-A1IU-01	Primary	0.379813
TCGA-BH-A0E2-01	Primary	0.196682
TCGA-A2-A0CZ-01	Primary	-0.16958
TCGA-AR-A2LE-01	Primary	0.350937
TCGA-A8-A0A1-01	Primary	-0.112082
TCGA-E2-A1L7-01	Primary	0.169833
TCGA-E2-A14T-01	Primary	0.416667
TCGA-AC-A5EH-01	Primary	0.174392
TCGA-GM-A2DM-01	Primary	0.410081
TCGA-A2-A0D4-01	Primary	0.449848
TCGA-BH-A0B1-01	Primary	0.198708
TCGA-AO-A12F-01	Primary	-0.230496
TCGA-AC-A3HN-01	Primary	-0.097771
TCGA-C8-A1HN-01	Primary	0.328141
TCGA-A2-A25C-01	Primary	0.263804
TCGA-E9-A6HE-01	Primary	0.220238
TCGA-EW-A6SB-01	Primary	0.169833
TCGA-E9-A1N4-01	Primary	-0.120187
TCGA-B6-A0RH-01	Primary	0.191616
TCGA-A8-A09N-01	Primary	0.377533
TCGA-AO-A0JE-01	Primary	-0.089539
TCGA-E2-A106-01	Primary	0.492401
TCGA-E2-A14S-01	Primary	0.277862
TCGA-AC-A3TM-01	Primary	0.323708
TCGA-AQ-A1H3-01	Primary	0.151849
TCGA-E2-A15R-01	Primary	0.295086
TCGA-A8-A06R-01	Primary	-0.0711753
TCGA-E9-A295-01	Primary	0.215679
TCGA-AC-A62X-01	Primary	0.289894
TCGA-BH-A18N-01	Primary	0.321175
TCGA-BH-A1FL-01	Primary	0.314336
TCGA-D8-A1XD-01	Primary	-0.110816
TCGA-AC-A2FB-01	Primary	-0.10195
TCGA-BH-A0DQ-01	Primary	-0.070542
TCGA-AC-A3W5-01	Primary	-0.0493921
TCGA-D8-A1JP-01	Primary	-0.0811803
TCGA-BH-A0HW-01	Primary	0.427685
TCGA-BH-A0BW-01	Primary	-0.140704
TCGA-LL-A6FP-01	Primary	0.569782
TCGA-A8-A0A4-01	Primary	-0.112969
TCGA-AC-A6IW-01	Primary	0.135132
TCGA-XX-A899-01	Primary	-0.132092
TCGA-A2-A25A-01	Primary	-0.208967
TCGA-E9-A1R5-01	Primary	0.170086
TCGA-5T-A9QA-01	Primary	0.680091
TCGA-GM-A3NW-01	Primary	0.320289
TCGA-D8-A1JS-01	Primary	0.571555
TCGA-AR-A1AJ-01	Primary	-0.253166
TCGA-AN-A0AK-01	Primary	0.458333
TCGA-D8-A73W-01	Primary	0.198582
TCGA-BH-A0BZ-01	Primary	0.156408
TCGA-A2-A0EU-01	Primary	0.320289
TCGA-B6-A401-01	Primary	0.219605
TCGA-AC-A7VC-01	Primary	-0.557371
TCGA-AR-A24P-01	Primary	0.173126
TCGA-S3-AA0Z-01	Primary	-0.162867
TCGA-LL-A50Y-01	Primary	0.413247
TCGA-OL-A5D8-01	Primary	0.351697
TCGA-A8-A08S-01	Primary	0.277736
TCGA-A8-A09K-01	Primary	0.439843
TCGA-BH-A0DI-01	Primary	-0.189083
TCGA-A2-A0T6-01	Primary	-0.144124
TCGA-A2-A25B-01	Primary	0.266337
TCGA-A2-A0SV-01	Primary	0.182244
TCGA-BH-A18G-01	Primary	0.274316
TCGA-AN-A0XR-01	Primary	0.396783
TCGA-A8-A0AB-01	Primary	0.343212
TCGA-AO-A1KO-01	Primary	-0.0735816
TCGA-A2-A0CU-01	Primary	0.299265
TCGA-A2-A1FZ-01	Primary	0.1654
TCGA-BH-A1FC-01	Primary	-0.202888
TCGA-E2-A14W-01	Primary	0.378926
TCGA-LL-A441-01	Primary	-0.200735
TCGA-PL-A8LX-01	Primary	0.334093
TCGA-XX-A89A-01	Primary	-0.157295
TCGA-BH-A8FZ-01	Primary	-0.0857396
TCGA-E9-A5UO-01	Primary	0.512791
TCGA-E2-A573-01	Primary	0.172492
TCGA-D8-A146-01	Primary	0.180471
TCGA-AO-A124-01	Primary	0.220365
TCGA-AR-A24Z-01	Primary	0.300405
TCGA-A8-A075-01	Primary	0.285208
TCGA-A8-A08A-01	Primary	0.282548
TCGA-AQ-A0Y5-01	Primary	0.093845
TCGA-B6-A0I9-01	Primary	0.371581
TCGA-BH-A28O-01	Primary	-0.0927052
TCGA-AR-A0TX-01	Primary	0.14501
TCGA-D8-A3Z6-01	Primary	0.350304
TCGA-A8-A093-01	Primary	0.24886
TCGA-A8-A07C-01	Primary	-0.223911
TCGA-A8-A099-01	Primary	0.404255
TCGA-BH-A201-01	Primary	0.115248
TCGA-AO-A0J3-01	Primary	0.386778
TCGA-AR-A24H-01	Primary	0.308511
TCGA-BH-A0WA-01	Primary	-0.095618
TCGA-AC-A3W6-01	Primary	-0.0758612
TCGA-AO-A0J2-01	Primary	0.399443
TCGA-A8-A08P-01	Primary	0.159321
TCGA-C8-A275-01	Primary	0.388931
TCGA-BH-A18P-01	Primary	0.337893
TCGA-B6-A0RQ-01	Primary	0.25076
TCGA-BH-A0BC-01	Primary	0.148556
TCGA-A7-A26E-01	Primary	0.202254
TCGA-BH-A2L8-01	Primary	-0.102457
TCGA-BH-A0DK-01	Primary	0.133232
TCGA-A2-A0T2-01	Primary	0.291033
TCGA-E2-A1IF-01	Primary	0.187817
TCGA-AR-A2LL-01	Primary	0.300659
TCGA-E9-A1N8-01	Primary	0.125507
TCGA-E9-A247-01	Primary	0.298126
TCGA-D8-A27E-01	Primary	0.350557
TCGA-EW-A1P0-01	Primary	0.292427
TCGA-C8-A1HF-01	Primary	-0.095618
TCGA-E9-A244-01	Primary	-0.158055
TCGA-AO-A0JD-01	Primary	0.388045
TCGA-A1-A0SO-01	Primary	0.260385
TCGA-A8-A09T-01	Primary	0.237209
TCGA-D8-A73X-01	Primary	0.240881
TCGA-AC-A8OS-01	Primary	-0.100431
TCGA-E2-A15C-01	Primary	0.231003
TCGA-BH-A18I-01	Primary	-0.119554
TCGA-EW-A1PF-01	Primary	0.18617
TCGA-E2-A108-01	Primary	-0.346251
TCGA-HN-A2OB-01	Primary	-0.0857396
TCGA-B6-A0RU-01	Primary	-0.177305
TCGA-AO-A0JC-01	Primary	-0.295339
TCGA-B6-A0RM-01	Primary	0.318262
TCGA-A8-A08G-01	Primary	0.33156
TCGA-E9-A3Q9-01	Primary	0.274823
TCGA-C8-A1HL-01	Primary	0.29306
TCGA-C8-A3M8-01	Primary	0.346631
TCGA-MS-A51U-01	Primary	0.121074
TCGA-AR-A24W-01	Primary	-0.0837133
TCGA-EW-A1P7-01	Primary	-0.299772
TCGA-A2-A04W-01	Primary	0.284954
TCGA-AC-A8OR-01	Primary	0.490755
TCGA-E2-A105-01	Primary	0.313703
TCGA-D8-A13Y-01	Primary	0.225557
TCGA-V7-A7HQ-01	Primary	0.345238
TCGA-AR-A2LO-01	Primary	-0.0910588
TCGA-3C-AALI-01	Primary	0.384119
TCGA-E2-A1LS-01	Primary	0.196555
TCGA-BH-A1FG-01	Primary	0.391464
TCGA-A8-A08H-01	Primary	-0.45656
TCGA-AR-A0TS-01	Primary	-0.207194
TCGA-A2-A3XU-01	Primary	0.285334
TCGA-D8-A1XG-01	Primary	0.318262
TCGA-AR-A0TT-01	Primary	-0.131966
TCGA-D8-A1JJ-01	Primary	0.159954
TCGA-D8-A145-01	Primary	0.153495
TCGA-BH-A1ES-01	Primary	0.198328
TCGA-C8-A12M-01	Primary	0.300912
TCGA-A2-A0CY-01	Primary	0.478217
TCGA-A8-A08L-01	Primary	0.242021
TCGA-OL-A5S0-01	Primary	-0.18655
TCGA-C8-A1HJ-01	Primary	-0.140451
TCGA-BH-A0BR-01	Primary	0.110309
TCGA-AO-A12E-01	Primary	0.258105
TCGA-S3-AA15-01	Primary	-0.335233
TCGA-OL-A5D7-01	Primary	0.197822
TCGA-OL-A5DA-01	Primary	0.310917
TCGA-B6-A0RL-01	Primary	0.620567
TCGA-OL-A66N-01	Primary	0.251393
TCGA-A2-A0CM-01	Primary	-0.185284
TCGA-S3-A6ZG-01	Primary	0.363349
TCGA-E9-A1RB-01	Primary	0.183511
TCGA-A2-A4RY-01	Primary	-0.0692756
TCGA-E9-A1R6-01	Primary	0.288754
TCGA-E9-A1R3-01	Primary	0.181864
TCGA-D8-A1JK-01	Primary	0.108283
TCGA-A2-A0CR-01	Primary	-0.0882725
TCGA-BH-AB28-01	Primary	0.308891
TCGA-E2-A10C-01	Primary	0.368541
TCGA-B6-A0WW-01	Primary	0.306864
TCGA-BH-A6R8-01	Primary	0.380319
TCGA-D8-A27L-01	Primary	-0.105243
TCGA-BH-A0EE-01	Primary	0.639311
TCGA-D8-A1JG-01	Primary	0.22695
TCGA-C8-A133-01	Primary	0.557244
TCGA-A2-A0EO-01	Primary	-0.0842199
TCGA-A2-A0YL-01	Primary	-0.0958713
TCGA-AR-A1AY-01	Primary	-0.158055
TCGA-B6-A0IC-01	Primary	0.568389
TCGA-AR-A24L-01	Primary	-0.101444
TCGA-AC-A3YJ-01	Primary	0.430344
TCGA-A8-A06U-01	Primary	0.344352
TCGA-AR-A0U0-01	Primary	0.215552
TCGA-BH-A1EW-01	Primary	0.148936
TCGA-AN-A0FF-01	Primary	0.286601
TCGA-AN-A0FX-01	Primary	-0.132852
TCGA-BH-A0DZ-01	Primary	0.152102
TCGA-A2-A0SU-01	Primary	0.249367
TCGA-E2-A15O-01	Primary	0.369554
TCGA-E2-A1LI-01	Primary	0.18921
TCGA-E9-A54Y-01	Primary	0.591945
TCGA-EW-A3E8-01	Primary	0.167933
TCGA-D8-A1XV-01	Primary	0.402102
TCGA-AR-A255-01	Primary	-0.0862462
TCGA-GM-A4E0-01	Primary	-0.22695
TCGA-B6-A0IE-01	Primary	0.322062
TCGA-A8-A07F-01	Primary	0.227837
TCGA-AN-A046-01	Primary	0.177558
TCGA-AR-A1AS-01	Primary	0.364742
TCGA-E2-A15T-01	Primary	0.445289
TCGA-GM-A2DB-01	Primary	0.39767
TCGA-EW-A1PH-01	Primary	0.160208
TCGA-BH-A0HP-01	Primary	0.200608
TCGA-AN-A0AM-01	Primary	0.195415
TCGA-C8-A1HG-01	Primary	-0.118288
TCGA-BH-A18L-01	Primary	0.450988
TCGA-A2-A0YI-01	Primary	0.173379
TCGA-D8-A4Z1-01	Primary	-0.12804
TCGA-GM-A2DK-01	Primary	0.153749
TCGA-E2-A1L9-01	Primary	-0.0764944
TCGA-BH-A0BA-01	Primary	0.261778
TCGA-C8-A12L-01	Primary	0.35271
TCGA-A8-A083-01	Primary	0.475937
TCGA-D8-A1XY-01	Primary	0.173506
TCGA-A2-A0D2-01	Primary	-0.166287
TCGA-AR-A1AL-01	Primary	-0.14653
TCGA-AO-A0J6-01	Primary	0.304078
TCGA-AO-A0J7-01	Primary	0.371074
TCGA-OL-A66H-01	Primary	0.265578
TCGA-D8-A1J9-01	Primary	0.272036
TCGA-BH-A0B5-01	Primary	0.210233
TCGA-BH-A0B4-01	Primary	0.156282
TCGA-AQ-A04H-01	Primary	0.341439
TCGA-AR-A1AX-01	Primary	-0.0816869
TCGA-BH-A0GZ-01	Primary	0.226444
TCGA-B6-A0IN-01	Primary	0.16388
TCGA-BH-A1F6-01	Primary	0.16958
TCGA-A8-A07U-01	Primary	-0.110182
TCGA-BH-A18V-01	Primary	-0.134245
TCGA-AQ-A04L-01	Primary	0.263045
TCGA-AR-A1AP-01	Primary	0.221251
TCGA-AC-A2QH-01	Primary	-0.612082
TCGA-AR-A24M-01	Primary	0.16464
TCGA-AR-A2LQ-01	Primary	-0.221251
TCGA-AC-A62Y-01	Primary	0.278875
TCGA-BH-A0HO-01	Primary	0.302938
TCGA-EW-A1OV-01	Primary	-0.127153
TCGA-A2-A0CK-01	Primary	0.193769
TCGA-E2-A1L8-01	Primary	0.18959
TCGA-EW-A1PG-01	Primary	-0.0599037
TCGA-E2-A14Q-01	Primary	0.325988
TCGA-EW-A1OY-01	Primary	0.302938
TCGA-BH-A18H-01	Primary	0.294706
TCGA-BH-A0HU-01	Primary	0.384372
TCGA-AO-A03R-01	Primary	0.224671
TCGA-A7-A26J-01	Primary	0.175405
TCGA-AN-A0FS-01	Primary	-0.0832067
TCGA-A2-A0ST-01	Primary	-0.14311
TCGA-D8-A27W-01	Primary	0.2519
TCGA-A2-A0SW-01	Primary	0.271783
TCGA-AO-A1KS-01	Primary	0.213526
TCGA-GM-A2DL-01	Primary	-0.0797872
TCGA-A2-A04X-01	Primary	0.363095
TCGA-EW-A1J6-01	Primary	0.242655
TCGA-B6-A0RP-01	Primary	0.179585
TCGA-E2-A159-01	Primary	0.179331
TCGA-BH-A0W4-01	Primary	0.181611
TCGA-E2-A10E-01	Primary	0.282801
TCGA-OL-A6VO-01	Primary	0.24962
TCGA-D8-A1Y3-01	Primary	0.282168
TCGA-E2-A14V-01	Primary	0.370187
TCGA-A2-A0D0-01	Primary	0.177305
TCGA-A2-A0T5-01	Primary	0.27381
TCGA-AN-A0XS-01	Primary	-0.109043
TCGA-B6-A402-01	Primary	0.28964
TCGA-D8-A1JB-01	Primary	0.18731
TCGA-E2-A109-01	Primary	0.304965
TCGA-B6-A0RE-01	Primary	0.193769
TCGA-E2-A2P5-01	Primary	0.274569
TCGA-OL-A66K-01	Primary	0.267477
TCGA-S3-AA11-01	Primary	0.395643
TCGA-C8-A134-01	Primary	-0.118034
TCGA-AN-A0AT-01	Primary	0.197948
TCGA-BH-A0HN-01	Primary	0.522163
TCGA-GM-A2DN-01	Primary	0.238855
TCGA-AO-A12D-01	Primary	0.169453
TCGA-A8-A08C-01	Primary	0.312057
TCGA-C8-A274-01	Primary	0.469478
TCGA-BH-A0HX-01	Primary	0.219098
TCGA-E9-A1NE-01	Primary	-0.115248
TCGA-BH-A0BP-01	Primary	-0.121707
TCGA-AR-A2LM-01	Primary	-0.087386
TCGA-BH-A1FR-01	Primary	0.310537
TCGA-B6-A0I1-01	Primary	0.414767
TCGA-W8-A86G-01	Primary	0.307244
TCGA-PL-A8LZ-01	Primary	-0.245821
TCGA-LD-A7W5-01	Primary	-0.120567
TCGA-D8-A1XU-01	Primary	0.212766
TCGA-E2-A15G-01	Primary	0.392097
TCGA-A2-A04R-01	Primary	0.313703
TCGA-AO-A126-01	Primary	-0.134625
TCGA-AO-A0JM-01	Primary	0.249113
TCGA-EW-A2FS-01	Primary	0.280268
TCGA-E2-A1LH-01	Primary	-0.127533
TCGA-A2-A25D-01	Primary	0.235056
TCGA-E9-A243-01	Primary	-0.162741
TCGA-4H-AAAK-01	Primary	-0.0902989
TCGA-E9-A1N6-01	Primary	-0.114995
TCGA-BH-A0E9-01	Primary	0.216692
TCGA-B6-A1KI-01	Primary	0.265324
TCGA-D8-A1X9-01	Primary	0.193769
TCGA-A1-A0SB-01	Primary	-0.0859929
TCGA-E2-A14P-01	Primary	0.350304
TCGA-BH-A0W5-01	Primary	-0.0901722
TCGA-E2-A15I-01	Primary	0.210613
TCGA-A2-A3XY-01	Primary	-0.257979
TCGA-BH-A0H5-01	Primary	-0.0957447
TCGA-OL-A5RY-01	Primary	-0.115755
TCGA-E9-A227-01	Primary	0.182624
TCGA-C8-A8HR-01	Primary	-0.161094
TCGA-EW-A2FV-01	Primary	0.26925
TCGA-BH-A0BG-01	Primary	-0.138425
TCGA-D8-A3Z5-01	Primary	0.323961
TCGA-BH-A1FD-01	Primary	0.206434
TCGA-B6-A0RV-01	Primary	0.298379
TCGA-E2-A1LA-01	Primary	0.168186
TCGA-A2-A04Y-01	Primary	0.258612
TCGA-AR-A24O-01	Primary	-0.170973
TCGA-EW-A2FW-01	Primary	0.300659
TCGA-A2-A0CQ-01	Primary	0.363095
TCGA-GM-A2DA-01	Primary	-0.0861196
TCGA-E9-A1NH-01	Primary	-0.110436
TCGA-AO-A12A-01	Primary	0.18465
TCGA-EW-A1IW-01	Primary	0.181864
TCGA-E2-A14U-01	Primary	0.392604
TCGA-C8-A12K-01	Primary	-0.177938
TCGA-OL-A5RU-01	Primary	0.302432
TCGA-LL-A5YM-01	Primary	0.337639
TCGA-BH-A0BS-01	Primary	0.41692
TCGA-AR-A2LK-01	Primary	0.165147
TCGA-OL-A6VR-01	Primary	0.464159
TCGA-5L-AAT1-01	Primary	0.182244
TCGA-E9-A1NA-01	Primary	0.1231
TCGA-A8-A091-01	Primary	0.258992
TCGA-A8-A07E-01	Primary	-0.112209
TCGA-BH-A18K-01	Primary	0.215426
TCGA-A1-A0SJ-01	Primary	0.151216
TCGA-D8-A1JL-01	Primary	-0.192123
TCGA-AR-A0TY-01	Primary	0.427938
TCGA-E2-A574-01	Primary	0.321809
TCGA-A8-A097-01	Primary	-0.107523
TCGA-AN-A0FZ-01	Primary	0.342072
TCGA-BH-A0E6-01	Primary	0.116388
TCGA-C8-A132-01	Primary	0.12424
TCGA-BH-A0H6-01	Primary	0.189843
TCGA-B6-A0RG-01	Primary	0.341819
TCGA-PL-A8LY-01	Primary	0.307497
TCGA-D8-A1XS-01	Primary	0.160588
TCGA-D8-A1JT-01	Primary	0.427938
TCGA-B6-A0RS-01	Primary	0.250253
TCGA-AC-A8OP-01	Primary	0.274823
TCGA-E9-A1RG-01	Primary	0.298126
TCGA-C8-A12Y-01	Primary	0.29002
TCGA-BH-A0DP-01	Primary	-0.10727
TCGA-E9-A1QZ-01	Primary	-0.154129
TCGA-GM-A2D9-01	Primary	0.254306
TCGA-GM-A3XL-01	Primary	0.288501
TCGA-LQ-A4E4-01	Primary	0.363982
TCGA-D8-A1X7-01	Primary	0.285334
TCGA-AN-A0XU-01	Primary	0.121581
TCGA-BH-A0BV-01	Primary	0.216819
TCGA-BH-A1FJ-01	Primary	0.432371
TCGA-EW-A1J1-01	Primary	0.353343
TCGA-A2-A4RX-01	Primary	-0.221125
TCGA-D8-A142-01	Primary	-0.16768
TCGA-EW-A1J2-01	Primary	-0.110436
TCGA-BH-A0HF-01	Primary	0.156408
TCGA-E9-A1N9-01	Primary	-0.116895
TCGA-E2-A570-01	Primary	-0.130572
TCGA-AO-A0JG-01	Primary	0.204534
TCGA-S3-A6ZH-01	Primary	0.500633
TCGA-D8-A1XC-01	Primary	0.489742
TCGA-AQ-A54N-01	Primary	0.287994
TCGA-C8-A131-01	Primary	0.259752
TCGA-E2-A1AZ-01	Primary	-0.309017
TCGA-E9-A3HO-01	Primary	0.307751
TCGA-A7-A5ZX-01	Primary	0.130952
TCGA-AR-A2LH-01	Primary	0.214539
TCGA-C8-A138-01	Primary	0.156282
TCGA-LL-A6FR-01	Primary	0.153242
TCGA-D8-A1JM-01	Primary	0.309777
TCGA-BH-A0BF-01	Primary	-0.129813
TCGA-A7-A0CH-01	Primary	0.325101
TCGA-LL-A73Y-01	Primary	-0.20694
TCGA-BH-A1FH-01	Primary	-0.189083
TCGA-AC-A4ZE-01	Primary	0.334473
TCGA-AR-A24U-01	Primary	0.12652
TCGA-A2-A0SX-01	Primary	-0.18731
TCGA-E9-A1ND-01	Primary	0.147163
TCGA-A8-A084-01	Primary	0.336753
TCGA-A1-A0SG-01	Primary	0.226444
TCGA-B6-A0X0-01	Primary	0.454154
TCGA-AR-A254-01	Primary	0.110562
TCGA-LD-A7W6-01	Primary	0.246201
TCGA-D8-A1Y0-01	Primary	-0.0932118
TCGA-BH-A18R-01	Primary	0.37272
TCGA-LL-A5YO-01	Primary	0.131459
TCGA-AO-A0J4-01	Primary	-0.133359
TCGA-E9-A1NG-01	Primary	-0.156915
TCGA-BH-A18M-01	Primary	-0.0908055
TCGA-A8-A085-01	Primary	0.245821
TCGA-E2-A10F-01	Primary	-0.0976444
TCGA-D8-A27H-01	Primary	-0.133105
TCGA-AN-A0XT-01	Primary	0.326494
TCGA-A2-A3Y0-01	Primary	0.266844
TCGA-AN-A0XL-01	Primary	-0.0804205
TCGA-AR-A0U2-01	Primary	0.3769
TCGA-A7-A5ZW-01	Primary	-0.0900456
TCGA-AN-A0AR-01	Primary	0.223151
TCGA-E9-A1RH-01	Primary	-0.123734
TCGA-LL-A5YL-01	Primary	0.350051
TCGA-E9-A22G-01	Primary	0.222391
TCGA-AR-A1AW-01	Primary	-0.226824
TCGA-BH-A1EN-01	Primary	0.444276
TCGA-B6-A409-01	Primary	0.231383
TCGA-A8-A0A2-01	Primary	0.221251
TCGA-AR-A2LJ-01	Primary	-0.0840932
TCGA-A7-A2KD-01	Primary	0.148556
TCGA-EW-A1P4-01	Primary	-0.0954914
TCGA-A8-A09M-01	Primary	0.31193
TCGA-E9-A245-01	Primary	0.371074
TCGA-E2-A1IP-01	Primary	-0.118414
TCGA-C8-A3M7-01	Primary	0.129686
TCGA-BH-A0DV-01	Primary	-0.201368
TCGA-D8-A27T-01	Primary	-0.0986575
TCGA-AO-A128-01	Primary	-0.126646
TCGA-EW-A1J3-01	Primary	0.265198
TCGA-AC-A2BM-01	Primary	0.215046
TCGA-AN-A0FN-01	Primary	-0.330167
TCGA-A8-A08O-01	Primary	0.180471
TCGA-A8-A09A-01	Primary	0.143364
TCGA-AO-A1KQ-01	Primary	0.302938
TCGA-WT-AB44-01	Primary	0.142604
TCGA-A2-A0T3-01	Primary	0.323582
TCGA-B6-A0RN-01	Primary	0.154129
TCGA-A7-A3J0-01	Primary	0.43845
TCGA-GM-A2DC-01	Primary	0.403622
TCGA-BH-A8G0-01	Primary	-0.123734
TCGA-A2-A0ET-01	Primary	0.39501
TCGA-C8-A12Q-01	Primary	0.252406
TCGA-BH-A0E7-01	Primary	0.365122
TCGA-AN-A04A-01	Primary	0.18921
TCGA-E9-A2JT-01	Primary	-0.226064
TCGA-E9-A1R7-01	Primary	0.346378
TCGA-E2-A1LL-01	Primary	0.170086
TCGA-E9-A1R0-01	Primary	-0.137031
TCGA-A8-A07B-01	Primary	0.230623
TCGA-EW-A1PE-01	Primary	0.224924
TCGA-A7-A6VY-01	Primary	-0.0802938
TCGA-E2-A156-01	Primary	0.449595
TCGA-A7-A426-01	Primary	0.127153
TCGA-A8-A06Q-01	Primary	0.549645
TCGA-D8-A73U-01	Primary	-0.0821935
TCGA-E9-A54X-01	Primary	0.62196
TCGA-A8-A0A7-01	Primary	-0.138804
TCGA-E2-A14Y-01	Primary	0.31307
TCGA-D8-A1JN-01	Primary	0.493288
TCGA-AN-A0AJ-01	Primary	0.217832
TCGA-A8-A076-01	Primary	0.291667
TCGA-A2-A0ES-01	Primary	-0.0881459
TCGA-BH-A1F2-01	Primary	0.119428
TCGA-B6-A408-01	Primary	0.181611
TCGA-E9-A5FK-01	Primary	0.1269
TCGA-LL-A7SZ-01	Primary	0.197695
TCGA-E2-A572-01	Primary	0.469098
TCGA-BH-A0B0-01	Primary	0.1269
TCGA-A8-A09D-01	Primary	-0.104863
TCGA-A2-A0YJ-01	Primary	0.302305
TCGA-D8-A13Z-01	Primary	0.233029
TCGA-A1-A0SI-01	Primary	-0.0928318
TCGA-E2-A14O-01	Primary	0.386651
TCGA-BH-A0E0-01	Primary	0.357649
TCGA-A7-A3IY-01	Primary	0.118541
TCGA-EW-A1P3-01	Primary	0.275456
TCGA-AR-A24V-01	Primary	-0.142477
TCGA-EW-A423-01	Primary	0.499493
TCGA-LD-A66U-01	Primary	0.204914
TCGA-A7-A13F-01	Primary	0.335106
TCGA-BH-A1FB-01	Primary	-0.175152
TCGA-BH-A0BM-01	Primary	0.223024
TCGA-AR-A1AU-01	Primary	0.139944
TCGA-A2-A0YF-01	Primary	0.414387
TCGA-E2-A1IE-01	Primary	0.445922
TCGA-AC-A2FE-01	Primary	-0.12462
TCGA-AC-A3W7-01	Primary	0.287107
TCGA-A7-A26G-01	Primary	-0.232649
TCGA-LL-A8F5-01	Primary	-0.189336
TCGA-A2-A4S2-01	Primary	0.240248
TCGA-BH-A0W3-01	Primary	0.443389
TCGA-LL-A7T0-01	Primary	0.347138
TCGA-A7-A5ZV-01	Primary	-0.116135
TCGA-AO-A0JB-01	Primary	0.221251
TCGA-B6-A0I5-01	Primary	0.314083
TCGA-EW-A1IZ-01	Primary	0.29382
TCGA-AO-A12H-01	Primary	0.366135
TCGA-A8-A0A9-01	Primary	0.266971
TCGA-AC-A2FG-01	Primary	0.212513
TCGA-A2-A0T1-01	Primary	-0.132725
TCGA-AO-A0JJ-01	Primary	-0.0688956
TCGA-BH-A0E1-01	Primary	0.341565
TCGA-AC-A3QP-01	Primary	0.142984
TCGA-B6-A0IP-01	Primary	0.285334
TCGA-Z7-A8R6-01	Primary	0.344732
TCGA-E2-A154-01	Primary	0.29192
TCGA-A2-A0EW-01	Primary	-0.12196
TCGA-BH-A0AU-01	Primary	0.128546
TCGA-BH-A1ET-01	Primary	0.235689
TCGA-AO-A03V-01	Primary	0.329027
TCGA-GM-A5PX-01	Primary	-0.120694
TCGA-C8-A135-01	Primary	0.195669
TCGA-BH-A0AW-01	Primary	0.152229
TCGA-AR-A24N-01	Primary	0.240628
TCGA-A8-A09Q-01	Primary	0.161981
TCGA-E9-A22D-01	Primary	0.210486
TCGA-B6-A0I6-01	Primary	-0.129179
TCGA-D8-A1JH-01	Primary	-0.102584
TCGA-E9-A1RE-01	Primary	0.321049
TCGA-E2-A1BC-01	Primary	-0.109802
TCGA-BH-A0C0-01	Primary	0.221378
TCGA-AR-A24X-01	Primary	0.211373
TCGA-EW-A1OW-01	Primary	-0.187943
TCGA-A7-A3RF-01	Primary	0.397416
TCGA-A8-A07G-01	Primary	-0.0764944
TCGA-AC-A23C-01	Primary	0.205927
TCGA-AC-A23H-01	Primary	0.380826
TCGA-D8-A1XF-01	Primary	0.434524
TCGA-AR-A0U4-01	Primary	-0.193516
TCGA-A8-A09C-01	Primary	0.338273
TCGA-AN-A0XP-01	Primary	0.354357
TCGA-D8-A1XK-01	Primary	-0.130826
TCGA-EW-A6S9-01	Primary	0.254306
TCGA-A8-A08T-01	Primary	0.321682
TCGA-AR-A0TP-01	Primary	-0.130446
TCGA-E2-A15D-01	Primary	0.236322
TCGA-B6-A0IQ-01	Primary	-0.133359
TCGA-AN-A0XO-01	Primary	0.275583
TCGA-BH-A0B8-01	Primary	0.281155
TCGA-AO-A129-01	Primary	-0.109549
TCGA-GM-A2DF-01	Primary	-0.171986
TCGA-D8-A27M-01	Primary	-0.176545
TCGA-AN-A03X-01	Primary	-0.115248
TCGA-OL-A66O-01	Primary	0.429205
TCGA-EW-A6SA-01	Primary	0.39653
TCGA-BH-A5J0-01	Primary	0.194149
TCGA-BH-A0EB-01	Primary	0.163374
TCGA-B6-A0IB-01	Primary	0.421226
TCGA-B6-A0WY-01	Primary	0.198075
TCGA-AC-A3BB-01	Primary	-0.099924
TCGA-AN-A049-01	Primary	0.236955
TCGA-A8-A06Z-01	Primary	0.523556
TCGA-C8-A1HI-01	Primary	0.306104
TCGA-BH-A0HL-01	Primary	0.372087
TCGA-A1-A0SF-01	Primary	0.265578
TCGA-AR-A2LR-01	Primary	-0.368161
TCGA-E9-A1RF-01	Primary	0.19035
TCGA-B6-A0RT-01	Primary	-0.235182
TCGA-E9-A1RI-01	Primary	-0.0668693
TCGA-BH-A0DL-01	Primary	0.23151
TCGA-AR-A251-01	Primary	-0.137665
TCGA-AC-A3TN-01	Primary	0.405142
TCGA-AC-A2QI-01	Primary	0.18731
TCGA-B6-A0X4-01	Primary	0.493541
TCGA-E2-A1B5-01	Primary	-0.0876393
TCGA-A2-A0YH-01	Primary	0.10233
TCGA-A8-A06T-01	Primary	0.286221
TCGA-E9-A22H-01	Primary	0.351444
TCGA-BH-A0DE-01	Primary	-0.12766
TCGA-OL-A5RW-01	Primary	0.239995
TCGA-A8-A090-01	Primary	0.187437
TCGA-AO-A03O-01	Primary	0.26773
TCGA-BH-A18S-01	Primary	0.460613
TCGA-A2-A3KD-01	Primary	0.264311
TCGA-E2-A56Z-01	Primary	0.429711
TCGA-BH-A0GY-01	Primary	0.222771
TCGA-AC-A2FF-01	Primary	-0.265324
TCGA-BH-A0H3-01	Primary	-0.140831
TCGA-A2-A25F-01	Primary	-0.538247
TCGA-A7-A26F-01	Primary	0.0911854
TCGA-A7-A26H-01	Primary	0.174392
TCGA-B6-A0WT-01	Primary	0.210486
TCGA-BH-A28Q-01	Primary	0.216439
TCGA-B6-A1KF-01	Primary	0.174772
TCGA-S3-A6ZF-01	Primary	0.317376
TCGA-WT-AB41-01	Primary	0.218465
TCGA-AC-A62V-01	Primary	0.317756
TCGA-UU-A93S-01	Primary	0.473151
TCGA-E2-A1LK-01	Primary	0.322822
TCGA-S3-AA17-01	Primary	0.267224
TCGA-BH-A209-01	Primary	-0.144757
TCGA-GI-A2C8-01	Primary	-0.0789007
TCGA-OL-A5D6-01	Primary	0.240375
TCGA-BH-A0EA-01	Primary	-0.123734
TCGA-E9-A1R4-01	Primary	0.22809
TCGA-A8-A092-01	Primary	0.332194
TCGA-BH-A18F-01	Primary	-0.110689
TCGA-AC-A3OD-01	Primary	0.164767
TCGA-C8-A12V-01	Primary	-0.201241
TCGA-A8-A06O-01	Primary	0.282548
TCGA-E9-A1RD-01	Primary	0.295973
TCGA-A8-A06N-01	Primary	0.524063
TCGA-A7-A13D-01	Primary	0.136272
TCGA-D8-A1XQ-01	Primary	-0.138804
TCGA-AR-A0TW-01	Primary	0.366135
TCGA-JL-A3YX-01	Primary	0.353723
TCGA-BH-A0H7-01	Primary	0.190729
TCGA-OK-A5Q2-01	Primary	0.238855
TCGA-D8-A141-01	Primary	-0.173759
TCGA-A7-A56D-01	Primary	0.180978
TCGA-C8-A26V-01	Primary	0.340172
TCGA-A2-A0YE-01	Primary	-0.115502
TCGA-A2-A0CW-01	Primary	0.467705
TCGA-AR-A24K-01	Primary	0.309017
TCGA-A1-A0SQ-01	Primary	0.402736
TCGA-C8-A27B-01	Primary	0.181358
TCGA-D8-A143-01	Primary	0.237715
TCGA-E9-A248-01	Primary	0.21074
TCGA-A2-A04N-01	Primary	0.181358
TCGA-A2-A3KC-01	Primary	0.149316
TCGA-A2-A0EM-01	Primary	0.201114
TCGA-GM-A2DI-01	Primary	-0.164387
TCGA-AO-A12B-01	Primary	0.429711
TCGA-BH-A0DT-01	Primary	0.210233
TCGA-A7-A4SC-01	Primary	0.234043
TCGA-D8-A140-01	Primary	0.323835
TCGA-A8-A07O-01	Primary	0.166413
TCGA-BH-A208-01	Primary	-0.213273
TCGA-B6-A0IA-01	Primary	0.506332
TCGA-AR-A0TZ-01	Primary	0.309144
TCGA-E2-A10A-01	Primary	0.289007
TCGA-A7-A6VW-01	Primary	0.26849
TCGA-C8-A26Y-01	Primary	0.483916
TCGA-AO-A0J5-01	Primary	-0.10423
TCGA-B6-A2IU-01	Primary	0.386272
TCGA-C8-A26Z-01	Primary	0.348911
TCGA-D8-A27N-01	Primary	0.188703
TCGA-D8-A27K-01	Primary	0.197442
TCGA-E2-A14X-01	Primary	0.169073
TCGA-A2-A1G1-01	Primary	-0.22733
TCGA-A7-A26I-01	Primary	-0.202888
TCGA-BH-A6R9-01	Primary	-0.634752
TCGA-A7-A0DA-01	Primary	-0.10157
TCGA-A8-A09E-01	Primary	0.462639
TCGA-AN-A0G0-01	Primary	0.257599
TCGA-E2-A15E-01	Primary	0.202381
TCGA-LL-A73Z-01	Primary	0.118034
TCGA-E2-A9RU-01	Primary	0.260512
TCGA-LD-A9QF-01	Primary	-0.0904255
TCGA-OL-A66P-01	Primary	-0.12728
TCGA-E2-A1LG-01	Primary	0.441743
TCGA-A8-A081-01	Primary	0.414134
TCGA-A8-A0A6-01	Primary	0.229863
TCGA-BH-A0HB-01	Primary	0.272163
TCGA-A8-A08B-01	Primary	0.43769
TCGA-E2-A15L-01	Primary	0.2077
TCGA-B6-A1KC-01	Primary	0.225431
TCGA-E2-A15S-01	Primary	0.448961
TCGA-A2-A0YD-01	Primary	-0.110562
TCGA-E2-A1B1-01	Primary	-0.100684
TCGA-C8-A27A-01	Primary	0.358789
TCGA-A8-A082-01	Primary	0.330167
TCGA-D8-A1JI-01	Primary	0.350557
TCGA-A2-A0T7-01	Primary	0.140704
TCGA-E9-A1N3-01	Primary	0.385385
TCGA-OL-A6VQ-01	Primary	0.118034
TCGA-AN-A0FK-01	Primary	0.408435
TCGA-LL-A442-01	Primary	0.35537
TCGA-D8-A1JC-01	Primary	0.195035
TCGA-EW-A6SD-01	Primary	0.267224
TCGA-A1-A0SP-01	Primary	-0.103723
TCGA-E2-A15P-01	Primary	0.258485
TCGA-AC-A6IV-01	Primary	-0.194149
TCGA-C8-A1HE-01	Primary	0.416413
TCGA-A8-A086-01	Primary	0.103597
TCGA-OL-A66I-01	Primary	-0.244428
TCGA-E2-A1IG-01	Primary	0.183384
TCGA-AR-A24Q-01	Primary	-0.273303
TCGA-E2-A1B4-01	Primary	0.371581
TCGA-B6-A0IM-01	Primary	0.228343
TCGA-C8-A12T-01	Primary	0.154129
TCGA-A1-A0SK-01	Primary	0.177812
TCGA-D8-A147-01	Primary	-0.113982
TCGA-A8-A06P-01	Primary	0.117908
TCGA-A8-A07J-01	Primary	-0.132092
TCGA-OL-A66L-01	Primary	0.141591
TCGA-A2-A4S3-01	Primary	0.31117
TCGA-AR-A5QM-01	Primary	0.193769
TCGA-AR-A0TR-01	Primary	0.542553
TCGA-D8-A27V-01	Primary	0.277482
TCGA-A2-A3XS-01	Primary	0.18579
TCGA-A8-A07W-01	Primary	0.245441
TCGA-EW-A424-01	Primary	0.202888
TCGA-A7-A0CJ-01	Primary	0.338526
TCGA-S3-AA12-01	Primary	0.384625
TCGA-A2-A04V-01	Primary	0.151596
TCGA-AC-A2QJ-01	Primary	-0.366768
TCGA-A2-A0EV-01	Primary	0.182877
TCGA-EW-A3U0-01	Primary	-0.303951
TCGA-E9-A228-01	Primary	0.290907
TCGA-AO-A12C-01	Primary	0.134878
TCGA-D8-A1XM-01	Primary	-0.0837133
TCGA-AO-A125-01	Primary	0.535208
TCGA-BH-A0B2-01	Primary	-0.0920719
TCGA-E2-A1IL-01	Primary	0.210993
TCGA-E2-A150-01	Primary	-0.167933
TCGA-BH-A0BO-01	Primary	-0.117275
TCGA-AO-A0J8-01	Primary	0.276596
TCGA-E2-A576-01	Primary	0.378673
TCGA-3C-AALK-01	Primary	0.209726
TCGA-AR-A1AT-01	Primary	0.277482
TCGA-A2-A1G4-01	Primary	0.338273
TCGA-BH-A1F0-01	Primary	-0.276469
TCGA-A2-A0CS-01	Primary	0.265578
TCGA-EW-A2FR-01	Primary	-0.12348
TCGA-A8-A09X-01	Primary	0.203901
TCGA-BH-A203-01	Primary	0.210613
TCGA-A2-A1FX-01	Primary	0.184904
TCGA-BH-A1EX-01	Primary	0.203394
TCGA-HN-A2NL-01	Primary	-0.224417
TCGA-A2-A0SY-01	Primary	-0.136525
TCGA-A2-A0YT-01	Primary	0.388551
TCGA-E2-A1IO-01	Primary	-0.0814336
TCGA-B6-A400-01	Primary	-0.144757
TCGA-B6-A0IK-01	Primary	0.433384
TCGA-B6-A0IO-01	Primary	0.416667
TCGA-BH-A1FM-01	Primary	0.0973911
TCGA-E2-A3DX-01	Primary	-0.195035
TCGA-D8-A1J8-01	Primary	0.20808
TCGA-A8-A09B-01	Primary	0.274316
TCGA-A8-A09Z-01	Primary	0.414387
TCGA-B6-A0IG-01	Primary	0.466945
TCGA-A7-A6VV-01	Primary	-0.10195
TCGA-BH-A1F8-01	Primary	0.287614
TCGA-A2-A0CV-01	Primary	0.171353
TCGA-B6-A0WS-01	Primary	0.194656
TCGA-OL-A5RZ-01	Primary	0.408688
TCGA-BH-A1EV-01	Primary	0.245567
TCGA-AR-A0TU-01	Primary	-0.216312
TCGA-EW-A1IX-01	Primary	-0.133992
TCGA-E2-A15K-01	Primary	0.350937
TCGA-AR-A1AR-01	Primary	-0.261905
TCGA-E9-A1R2-01	Primary	0.201621
TCGA-E2-A1B6-01	Primary	-0.0943516
TCGA-AC-A5XS-01	Primary	0.243668
TCGA-AQ-A1H2-01	Primary	0.401976
TCGA-AR-A1AO-01	Primary	-0.254433
TCGA-E2-A15H-01	Primary	0.390071
TCGA-B6-A0WZ-01	Primary	0.388045
TCGA-GM-A2DD-01	Primary	-0.132852
TCGA-AR-A1AV-01	Primary	0.320922
TCGA-C8-A12P-01	Primary	0.261145
TCGA-AN-A0XN-01	Primary	-0.214159
TCGA-AN-A0AL-01	Primary	0.14501
TCGA-C8-A12X-01	Primary	0.339032
TCGA-AO-A03T-01	Primary	0.320922
TCGA-GI-A2C9-01	Primary	-0.0928318
TCGA-BH-A1FU-01	Primary	-0.128673
TCGA-E9-A226-01	Primary	0.120441
TCGA-A8-A095-01	Primary	0.255572
TCGA-E2-A2P6-01	Primary	0.427178
TCGA-E2-A158-01	Primary	0.286221
TCGA-C8-A137-01	Primary	0.350937
TCGA-BH-A0DD-01	Primary	0.282042
TCGA-A2-A259-01	Primary	-0.1269
TCGA-BH-A0RX-01	Primary	-0.213146
TCGA-E9-A1RA-01	Primary	0.261398
TCGA-EW-A1PA-01	Primary	0.233156
TCGA-A8-A07R-01	Primary	0.195795
TCGA-C8-A8HQ-01	Primary	0.226444
TCGA-E9-A24A-01	Primary	0.185537
TCGA-BH-A204-01	Primary	0.262285
TCGA-A2-A0EN-01	Primary	-0.142224
TCGA-B6-A40B-01	Primary	0.2923
TCGA-A8-A094-01	Primary	0.283435
TCGA-A2-A0D1-01	Primary	0.288754
TCGA-PL-A8LV-01	Primary	0.234802
TCGA-AN-A0FD-01	Primary	0.153242
TCGA-A7-A0CD-01	Primary	0.355117
TCGA-A1-A0SD-01	Primary	0.196302
TCGA-BH-A0BJ-01	Primary	0.169326
TCGA-A8-A08J-01	Primary	0.265831
TCGA-E2-A1IN-01	Primary	-0.121327
TCGA-BH-A0BD-01	Primary	0.138425
TCGA-BH-A18U-01	Primary	0.20884
TCGA-A1-A0SM-01	Primary	0.239742
TCGA-A8-A09I-01	Primary	0.324721
TCGA-D8-A1JF-01	Primary	0.201494
TCGA-E9-A5UP-01	Primary	0.625633
TCGA-E2-A1IH-01	Primary	-0.209473
TCGA-PE-A5DD-01	Primary	0.259878
TCGA-AO-A03N-01	Primary	0.229357
TCGA-AR-A1AH-01	Primary	-0.14425
TCGA-AO-A0JI-01	Primary	0.352077
TCGA-OL-A97C-01	Primary	-0.12196
TCGA-AR-A250-01	Primary	0.155775
TCGA-BH-A0HQ-01	Primary	0.267224
TCGA-JL-A3YW-01	Primary	-0.0754813
TCGA-AC-A3YI-01	Primary	-0.0843465
TCGA-C8-A12U-01	Primary	0.421479
TCGA-AO-A0JL-01	Primary	-0.0942249
TCGA-AO-A0JF-01	Primary	-0.102837
TCGA-EW-A1P6-01	Primary	0.287107
TCGA-A2-A3XZ-01	Primary	0.330167
TCGA-BH-A0C1-01	Primary	0.180724
TCGA-BH-A0AV-01	Primary	-0.191869
TCGA-D8-A1JD-01	Primary	-0.104863
TCGA-A2-A4RW-01	Primary	0.225557
TCGA-AC-A2FO-01	Primary	-0.120694
TCGA-AR-A2LN-01	Primary	-0.121074
TCGA-E2-A1BD-01	Primary	0.285081
TCGA-S3-AA14-01	Primary	0.179331
TCGA-A8-A07L-01	Primary	0.225811
TCGA-LL-A5YN-01	Primary	0.276342
TCGA-AR-A24R-01	Primary	0.302432
TCGA-BH-A0DH-01	Primary	0.393744
TCGA-D8-A1XT-01	Primary	-0.122087
TCGA-EW-A1IY-01	Primary	-0.100304
TCGA-A7-A4SE-01	Primary	-0.152989
TCGA-A2-A1FW-01	Primary	0.24696
TCGA-E2-A155-01	Primary	0.464286
TCGA-B6-A3ZX-01	Primary	-0.200735
TCGA-EW-A1PB-01	Primary	0.137411
TCGA-A7-A425-01	Primary	0.234422
TCGA-LL-A9Q3-01	Primary	0.371327
TCGA-AN-A0FJ-01	Primary	-0.115755
TCGA-AN-A03Y-01	Primary	0.239108
TCGA-E2-A15M-01	Primary	-0.189336
TCGA-OL-A66J-01	Primary	0.16806
TCGA-AN-A04D-01	Primary	0.305724
TCGA-A8-A08I-01	Primary	0.180091
TCGA-B6-A40C-01	Primary	0.173632
TCGA-A8-A08F-01	Primary	0.16844
TCGA-BH-A0B3-01	Primary	-0.104863
TCGA-AO-A12G-01	Primary	0.16654
TCGA-AQ-A04J-01	Primary	-0.220365
TCGA-C8-A1HM-01	Primary	0.308891
TCGA-A2-A3XX-01	Primary	0.169706
TCGA-EW-A1P1-01	Primary	-0.283688
TCGA-A2-A0YM-01	Primary	0.166793
TCGA-E9-A3X8-01	Primary	0.118034
TCGA-A8-A08Z-01	Primary	-0.121454
TCGA-D8-A27F-01	Primary	-0.145643
TCGA-AN-A041-01	Primary	0.216819
TCGA-AR-A0U3-01	Primary	0.437943
TCGA-A2-A0CL-01	Primary	-0.233409
TCGA-LL-A5YP-01	Primary	-0.215426
TCGA-AC-A3EH-01	Primary	0.316869
TCGA-AN-A04C-01	Primary	0.444149
TCGA-E9-A1RC-01	Primary	0.302812
TCGA-AC-A2FK-01	Primary	-0.0939716
TCGA-D8-A1XB-01	Primary	-0.107523
TCGA-A2-A0D3-01	Primary	0.447315
TCGA-E2-A152-01	Primary	0.19035
TCGA-GM-A3NY-01	Primary	0.255193
TCGA-AC-A2B8-01	Primary	-0.0825735
TCGA-E2-A1B0-01	Primary	0.20694
TCGA-BH-A1EU-01	Primary	-0.245567
TCGA-AR-A1AK-01	Primary	-0.101444
TCGA-E9-A2JS-01	Primary	0.288501
TCGA-GM-A5PV-01	Primary	0.434271
TCGA-AQ-A54O-01	Primary	0.367148
TCGA-AC-A6IX-01	Primary	0.137285
TCGA-C8-A1HK-01	Primary	0.41578
TCGA-AN-A0FL-01	Primary	0.377786
TCGA-BH-A1FN-01	Primary	0.0992908
TCGA-A2-A25E-01	Primary	0.311677
TCGA-A2-A0YC-01	Primary	0.251013
TCGA-A8-A09V-01	Primary	0.180978
TCGA-A2-A0CT-01	Primary	0.275963
TCGA-E9-A22E-01	Primary	-0.22733
TCGA-BH-A18Q-01	Primary	0.138045
TCGA-A2-A1FV-01	Primary	-0.127786
TCGA-AO-A03L-01	Primary	0.319402
TCGA-B6-A0WV-01	Primary	0.389438
TCGA-AN-A0XW-01	Primary	-0.113602
TCGA-AC-A23G-01	Primary	-0.194022
TCGA-AC-A3QQ-01	Primary	0.393237
TCGA-EW-A1P8-01	Primary	-0.102204
TCGA-B6-A0I2-01	Primary	0.223784
TCGA-A2-A0CX-01	Primary	0.160588
TCGA-B6-A0RI-01	Primary	0.213399
TCGA-B6-A0WX-01	Primary	-0.121201
TCGA-BH-A42U-01	Primary	-0.0566109
TCGA-A8-A09G-01	Primary	0.359676
TCGA-C8-A26W-01	Primary	0.203141
TCGA-AO-A03M-01	Primary	0.21074
TCGA-E2-A1LB-01	Primary	0.358663
TCGA-BH-A0DX-01	Primary	-0.111575
TCGA-AC-A6NO-01	Primary	0.378673
TCGA-EW-A1J5-01	Primary	0.196935
TCGA-AN-A0XV-01	Primary	0.159574
TCGA-BH-A1F5-01	Primary	0.308384
TCGA-A8-A07I-01	Primary	0.179838
TCGA-C8-A12W-01	Primary	0.16692
TCGA-AC-A8OQ-01	Primary	-0.214286
TCGA-A7-A4SF-01	Primary	0.426925
TCGA-EW-A6SC-01	Primary	-0.100811
TCGA-AO-A1KR-01	Primary	0.24962
TCGA-EW-A1PD-01	Primary	0.189083
TCGA-EW-A1PC-01	Primary	0.3346
TCGA-E2-A10B-01	Primary	0.204787
TCGA-AR-A0TQ-01	Primary	0.296733
TCGA-A2-A0EX-01	Primary	-0.113475
TCGA-E2-A14N-01	Primary	0.199975
TCGA-5L-AAT0-01	Primary	-0.112715
TCGA-AR-A1AN-01	Primary	-0.12348
TCGA-D8-A1X5-01	Primary	0.235816
TCGA-A2-A1G6-01	Primary	-0.0800405
TCGA-A2-A04T-01	Primary	-0.14729
TCGA-B6-A0IJ-01	Primary	0.144504
TCGA-AR-A256-01	Primary	0.186677
TCGA-A7-A3J1-01	Primary	0.16502
TCGA-C8-A12O-01	Primary	0.126646
TCGA-E9-A249-01	Primary	0.357143
TCGA-UL-AAZ6-01	Primary	0.425532
TCGA-A8-A08R-01	Primary	-0.171099
TCGA-A2-A0T4-01	Primary	-0.120947
TCGA-BH-A0AZ-01	Primary	-0.135385
TCGA-AO-A03U-01	Primary	-0.117275
TCGA-A2-A0CO-01	Primary	-0.0738349
TCGA-D8-A1JE-01	Primary	-0.10157
TCGA-BH-A0H0-01	Primary	0.461753
TCGA-AR-A5QP-01	Primary	0.196682
TCGA-D8-A27R-01	Primary	0.315983
TCGA-C8-A278-01	Primary	0.121581
TCGA-A7-A13G-01	Primary	0.409954
TCGA-A8-A079-01	Primary	0.391211
TCGA-A2-A0EP-01	Primary	-0.318642
TCGA-A2-A0T0-01	Primary	0.176418
TCGA-D8-A27I-01	Primary	-0.169326
TCGA-BH-A0EI-01	Primary	-0.0763678
TCGA-E2-A15A-01	Primary	0.2904
TCGA-AC-A2FM-01	Primary	0.354483
TCGA-BH-A1EY-01	Primary	0.152356
TCGA-AN-A0FT-01	Primary	0.261018
TCGA-E9-A1NF-01	Primary	-0.187183
TCGA-BH-A0B6-01	Primary	0.12272
TCGA-C8-A130-01	Primary	0.201748
TCGA-A2-A0ER-01	Primary	0.392857
TCGA-A2-A0EQ-01	Primary	0.155142
TCGA-D8-A1XL-01	Primary	0.236575
TCGA-C8-A12N-01	Primary	-0.128926
TCGA-GM-A2DO-01	Primary	0.106256
TCGA-A8-A0AD-01	Primary	0.161727
TCGA-Z7-A8R5-01	Primary	0.183131
TCGA-A8-A07S-01	Primary	0.318389
TCGA-BH-A0HI-01	Primary	0.309777
TCGA-AN-A0FV-01	Primary	0.281788
TCGA-AC-A23E-01	Primary	-0.117275
TCGA-AQ-A7U7-01	Primary	-0.212386
TCGA-C8-A26X-01	Primary	-0.115375
TCGA-D8-A1XJ-01	Primary	0.335233
TCGA-A8-A08X-01	Primary	-0.100177
TCGA-B6-A1KN-01	Primary	0.339286
TCGA-AR-A1AM-01	Primary	0.256206
TCGA-A2-A4S0-01	Primary	0.435664
TCGA-AO-A1KP-01	Primary	0.319782
TCGA-EW-A1OX-01	Primary	0.494301
TCGA-E9-A1NC-01	Primary	-0.111575
TCGA-LL-A740-01	Primary	0.245441
TCGA-BH-A0C3-01	Primary	-0.161221
TCGA-BH-A0H9-01	Primary	0.354357
TCGA-D8-A1X8-01	Primary	0.156535
TCGA-E9-A22A-01	Primary	-0.139691
TCGA-AR-A1AI-01	Primary	0.16426
TCGA-AC-A2BK-01	Primary	-0.0966312
TCGA-A7-A13H-01	Primary	0.226697
TCGA-LL-A6FQ-01	Primary	0.385512
TCGA-C8-A1HO-01	Primary	0.35119
TCGA-D8-A1XO-01	Primary	0.121707
TCGA-E2-A1LE-01	Primary	-0.0720618
TCGA-E2-A15J-01	Primary	0.424392
TCGA-A7-A0DB-01	Primary	0.196302
TCGA-BH-A1FE-01	Primary	-0.174899
TCGA-D8-A27G-01	Primary	-0.14843
TCGA-BH-A42T-01	Primary	0.255066
TCGA-AN-A0FY-01	Primary	0.202128
TCGA-B6-A0X5-01	Primary	0.473784
TCGA-A2-A0YK-01	Primary	-0.170973
TCGA-A7-A0CG-01	Primary	-0.115881
TCGA-AN-A0FW-01	Primary	0.285334
TCGA-D8-A27P-01	Primary	0.303825
TCGA-BH-A0DS-01	Primary	0.230117
TCGA-E2-A1L6-01	Primary	0.201368
TCGA-BH-A0DG-01	Primary	0.18503
TCGA-A2-A0CP-01	Primary	-0.0885258
TCGA-BH-A5IZ-01	Primary	0.265198
TCGA-A8-A09W-01	Primary	0.287361
TCGA-E2-A107-01	Primary	0.496074
TCGA-AR-A252-01	Primary	-0.150836
TCGA-C8-A12Z-01	Primary	0.364868
TCGA-BH-A202-01	Primary	0.206814
TCGA-AO-A1KT-01	Primary	0.170593
TCGA-D8-A1XW-01	Primary	-0.110942
TCGA-D8-A1JU-01	Primary	-0.212006
TCGA-E9-A1N5-01	Primary	-0.1269
TCGA-A2-A4S1-01	Primary	-0.597644
TCGA-E2-A153-01	Primary	-0.0792806
TCGA-A2-A0YG-01	Primary	0.411601
TCGA-BH-A0B7-01	Primary	-0.0892857
TCGA-D8-A1X6-01	Primary	0.312563
TCGA-BH-A0BL-01	Primary	-0.302558
TCGA-BH-A0DO-01	Primary	0.263551
TCGA-A2-A04Q-01	Primary	-0.163501
TCGA-E9-A1NI-01	Primary	0.235182
TCGA-BH-A0HY-01	Primary	0.284321
TCGA-AR-A24T-01	Primary	-0.125507
TCGA-AO-A0JA-01	Primary	0.178825
TCGA-D8-A1XZ-01	Primary	0.179331
TCGA-C8-A8HP-01	Primary	0.310917
TCGA-E9-A5FL-01	Primary	0.118794
TCGA-E2-A15F-01	Primary	0.279762
TCGA-A2-A3XT-01	Primary	-0.149823
TCGA-B6-A0X7-01	Primary	0.181104
TCGA-3C-AALJ-01	Primary	0.218972
TCGA-B6-A0X1-01	Primary	0.244174

## Sheet: TCGA_& MET500_breast_EMT
Sample	Tissue	EMT_Score	P_Value	Classification
MO_1032-capt-SI_4934-C0KFGACXX	Primary	0.443388	5.30999e-14	Epithelial
MO_1032-poly-SI_4925-C0KFGACXX	Primary	0.418337	1.80104e-12	Epithelial
MO_1031-capt-SI_5275-C0VU9ACXX	Liver	0.339714	2.61888e-08	Epithelial
MO_1031-poly-SI_5256-C0VU9ACXX	Liver	0.324555	1.30364e-07	Epithelial
MO_1051-capt-SI_5093-D0VCEACXX	Liver	0.531946	2.89049e-20	Epithelial
MO_1051-poly-SI_5091-D0VCEACXX	Liver	0.557254	2.55565e-22	Epithelial
MO_1107-capt-SI_5841-C19M0ACXX	Liver	0.471908	7.22778e-16	Epithelial
MO_1107-poly-SI_5773-C19M0ACXX	Liver	0.46223	3.22273e-15	Epithelial
MO_1126-capt-SI_6287-D1RTCACXX	Liver	0.402706	1.4469e-11	Epithelial
MO_1129-capt-SI_6222-D1RWDACXX	Liver	0.338472	2.99701e-08	Epithelial
MO_1159-capt-SI_6477-C1M1KACXX	Liver	0.590485	3.45059e-25	Epithelial
MO_1159-poly-SI_6459-C1N0NACXX	Liver	0.636862	1.46799e-29	Epithelial
MO_1167-capt-SI_6652-H0V81ADXX	Liver	0.272739	1.7225e-05	Epithelial
MO_1213-capt-SI_7016-C26CMACXX	Liver	0.31265	4.33869e-07	Epithelial
MO_1213-poly-SI_7008-C26CMACXX	Liver	0.32357	1.44292e-07	Epithelial
MO_1230-capt-SI_7133-C25UAACXX	Liver	0.411399	4.56109e-12	Epithelial
MO_1230-poly-SI_7117-C25UAACXX	Liver	0.452081	1.46155e-14	Epithelial
MO_1237-capt-SI_7190-C245WACXX	Liver	0.1963	0.00471492	Epithelial
MO_1237-poly-SI_7185-C245WACXX	Liver	0.235055	0.000344729	Epithelial
MO_1239-capt-SI_7209-C245WACXX	Liver	0.601148	3.75666e-26	Epithelial
MO_1239-poly-SI_7202-C245WACXX	Liver	0.638104	1.09452e-29	Epithelial
MO_1247-capt-SI_7265-C25YAACXX	Liver	0.463472	2.66617e-15	Epithelial
MO_1247-poly-SI_7235-C25YAACXX	Liver	0.464971	2.10051e-15	Epithelial
MO_1288-capt-SI_7733-C32VAACXX	Liver	0.142986	0.0787142	Intermediate
MO_1288-poly-SI_7729-C32VAACXX	Liver	0.16307	0.0302549	Epithelial
MO_1292-capt-SI_7736-C32VAACXX	Liver	0.333762	4.95432e-08	Epithelial
MO_1292-poly-SI_7732-C32VAACXX	Liver	0.351105	7.50687e-09	Epithelial
MO_1305-capt-SI_7919-C4CRJACXX	Liver	0.468696	1.17422e-15	Epithelial
MO_1305-poly-SI_7882-C4CRLACXX	Liver	0.492249	2.77163e-17	Epithelial
MO_1324-capt-SI_8129-C4E6CACXX	Liver	0.407931	7.21066e-12	Epithelial
MO_1324-poly-SI_8123-C4E6CACXX	Liver	0.468953	1.11986e-15	Epithelial
MO_1335-capt-SI_8245-C471RANXX	Liver	0.259592	5.16904e-05	Epithelial
MO_1335-poly-SI_8255-C471RANXX	Liver	0.300017	1.47259e-06	Epithelial
MO_1355-capt-SI_8457-C4L7VACXX	Liver	0.524752	1.05239e-19	Epithelial
MO_1355-poly-SI_8430-C4L7VACXX	Liver	0.569887	2.29026e-23	Epithelial
MO_1359-capt-SI_8460-C4L7VACXX	Liver	0.617506	1.13689e-27	Epithelial
MO_1359-poly-SI_8433-C4L7VACXX	Liver	0.683753	1.6261e-34	Epithelial
MO_1364-capt-SI_8599-HAABDADXX	Liver	0.238481	0.000269302	Epithelial
MO_1364-poly-SI_8568-HAABDADXX	Liver	0.259806	5.09737e-05	Epithelial
MO_1424-capt-SI_9381-C5N1GANXX	Liver	0.570615	1.922e-23	Epithelial
MO_1424-poly-SI_9376-C5N1GANXX	Liver	0.594424	1.50493e-25	Epithelial
MO_1435-capt-SI_9690-C5N0MANXX	Liver	0.480601	1.80368e-16	Epithelial
MO_1435-poly-SI_9665-C5N0MANXX	Liver	0.489294	4.38356e-17	Epithelial
MO_1439-capt-SI_9741-C5N0KANXX	Liver	-0.143157	0.0780296	Intermediate
MO_1439-poly-SI_9737-C5N0KANXX	Liver	-0.167223	0.0243951	Mesenchymal
MO_1454-capt-SI_9940-C6EJUANXX	Liver	0.537898	9.7951e-21	Epithelial
MO_1454-poly-SI_9919-C6EJUANXX	Liver	0.579565	3.28781e-24	Epithelial
MO_1495-capt-SI_11221-C6UTYANXX	Liver	0.38562	1.24906e-10	Epithelial
MO_1495-poly-SI_11204-C6UYMANXX	Liver	0.469938	9.66302e-16	Epithelial
MO_1513-capt-SI_11383-HVGHMADXX	Liver	0.52822	5.7223e-20	Epithelial
MO_1515-capt-SI_11438-HV7JNADXX	Liver	0.525737	8.97899e-20	Epithelial
MO_1515-poly-SI_11431-HVGHMADXX	Liver	0.569159	2.5243e-23	Epithelial
MO_1516-capt-SI_11439-HV7JNADXX	Liver	0.431483	2.91558e-13	Epithelial
MO_1516-poly-SI_11432-HVGHMADXX	Liver	0.47118	7.94877e-16	Epithelial
MO_1521-capt-SI_11539-C7GBMANXX	Liver	-0.153135	0.0493404	Mesenchymal
MO_1521-poly-SI_11530-C7GBMANXX	Liver	-0.171249	0.0197745	Mesenchymal
MO_1528-capt-SI_11541-C7GBMANXX	Liver	0.301473	1.28347e-06	Epithelial
MO_1528-poly-SI_11532-C7GBMANXX	Liver	0.364508	1.61828e-09	Epithelial
MO_1534-capt-SI_11904-C7F4VANXX	Liver	0.562693	9.36234e-23	Epithelial
MO_1536-capt-SI_11944-C7G8DANXX	Liver	-0.634635	2.36181e-29	Mesenchymal
MO_1551-capt-SI_12338-C7FN8ANXX	Liver	0.476876	3.28599e-16	Epithelial
TP_2025-capt-SI_6023-D1EBEACXX	Liver	0.340442	2.43177e-08	Epithelial
TP_2025-poly-SI_6011-D1EBEACXX	Liver	0.395298	3.6782e-11	Epithelial
TP_2083-capt-SI_10418-C6ET2ANXX	Liver	0.370718	7.75729e-10	Epithelial
TP_2083-poly-SI_10415-C6ET2ANXX	Liver	0.388789	8.52879e-11	Epithelial
TP_2141-capt-SI_12056-H53C5ADXX	Liver	-0.126542	0.156827	Intermediate
MO_1276-capt-SI_7601-C2G5LACXX	Lung	0.143499	0.0768759	Intermediate
MO_1276-poly-SI_7589-C2G5LACXX	Lung	0.199812	0.0037867	Epithelial
MO_1474-capt-SI_10595-C6JKTANXX	Lung	-0.487753	5.65367e-17	Mesenchymal
MO_1065-capt-SI_5217-C0VTMACXX	Lymph_Node	-0.184138	0.00969241	Mesenchymal
MO_1065-poly-SI_5186-C0VTMACXX	Lymph_Node	0.192831	0.00581805	Epithelial
MO_1068-capt-SI_5219-C0VTYACXX	Lymph_Node	0.488309	5.13165e-17	Epithelial
MO_1068-poly-SI_5188-C0VTYACXX	Lymph_Node	0.45752	6.58246e-15	Epithelial
MO_1069-capt-SI_5276-C0VU9ACXX	Lymph_Node	0.495718	1.56709e-17	Epithelial
MO_1069-poly-SI_5257-C0VU9ACXX	Lymph_Node	0.494476	1.92391e-17	Epithelial
MO_1178-capt-SI_6700-H0UUFADXX	Lymph_Node	0.318131	2.50077e-07	Epithelial
MO_1178-poly-SI_6689-H0UUFADXX	Lymph_Node	0.346394	1.26784e-08	Epithelial
MO_1188-capt-SI_6798-C33JEACXX	Lymph_Node	0.284858	5.96909e-06	Epithelial
MO_1188-poly-SI_6768-H77PAADXX	Lymph_Node	0.283402	6.78264e-06	Epithelial
MO_1195-capt-SI_6863-H77PRADXX	Lymph_Node	0.477604	2.93867e-16	Epithelial
MO_1195-poly-SI_6854-H77PRADXX	Lymph_Node	0.489765	4.17142e-17	Epithelial
MO_1266-capt-SI_7570-C2G8GACXX	Lymph_Node	0.32828	8.86278e-08	Epithelial
MO_1266-poly-SI_7558-C2G8GACXX	Lymph_Node	0.287127	4.84635e-06	Epithelial
MO_1271-capt-SI_7597-D2GFBACXX	Lymph_Node	0.289354	3.96523e-06	Epithelial
MO_1271-poly-SI_7586-D2GFBACXX	Lymph_Node	0.295307	2.29111e-06	Epithelial
MO_1287-capt-SI_7686-C33JEACXX	Lymph_Node	0.469424	1.06516e-15	Epithelial
MO_1287-poly-SI_7679-C33JEACXX	Lymph_Node	0.488995	4.61075e-17	Epithelial
MO_1317-capt-SI_7994-C4CW0ACXX	Lymph_Node	0.43765	1.20285e-13	Epithelial
MO_1317-poly-SI_7957-C475EANXX	Lymph_Node	0.443345	5.31323e-14	Epithelial
MO_1318-capt-SI_7995-C4CW0ACXX	Lymph_Node	0.323827	1.40433e-07	Epithelial
MO_1318-poly-SI_7958-C4CW0ACXX	Lymph_Node	0.332777	5.47779e-08	Epithelial
MO_1418-capt-SI_9313-C5N2AANXX	Lymph_Node	0.306954	7.58054e-07	Epithelial
MO_1418-poly-SI_9308-HAKJHADXX	Lymph_Node	0.317103	2.78051e-07	Epithelial
MO_1425-capt-SI_9475-C5N19ANXX	Lymph_Node	0.604102	1.99007e-26	Epithelial
MO_1425-poly-SI_9469-C5N19ANXX	Lymph_Node	0.597422	8.41454e-26	Epithelial
MO_1503-capt-SI_11316-C6UY8ANXX	Lymph_Node	-0.123073	0.17948	Intermediate
MO_1524-capt-SI_11625-C7G67ANXX	Lymph_Node	0.117463	0.221248	Intermediate
MO_1537-capt-SI_12026-C7FVYANXX	Lymph_Node	-0.0886005	0.549768	Intermediate
MO_1557-capt-SI_12474-C7G91ANXX	Lymph_Node	0.28807	4.46139e-06	Epithelial
TP_2015-capt-SI_6027-D1E7VACXX	Lymph_Node	0.120889	0.195082	Intermediate
TP_2109-capt-SI_11420-C6UUUANXX	Lymph_Node	0.387076	1.06262e-10	Epithelial
TP_2109-poly-SI_11372-C6UUUANXX	Lymph_Node	0.375428	4.41808e-10	Epithelial
TP_2118-capt-SI_11547-C7GBMANXX	Lymph_Node	-0.113952	0.251221	Intermediate
TP_2122-capt-SI_11543-C7GBMANXX	Lymph_Node	-0.208162	0.00222633	Mesenchymal
TP_2122-poly-SI_11534-C7GBMANXX	Lymph_Node	-0.166752	0.0250338	Mesenchymal

## Sheet: MET500_pancancer_LV&LN_EMT
Sample	Tissue	Cohort	EMT_Score	P_Value	Classification
MO_1001-poly-SI_4110-D0CG3ABXX	Liver	COLO	0.637119	1.31157e-29	Epithelial
MO_1005-poly-SI_4154-C0282ABXX	Liver	SARC	-0.38061	2.35487e-10	Mesenchymal
MO_1007-poly-SI_4349-D07RMACXX	Liver	CHOL	-0.232785	0.000409497	Mesenchymal
MO_1020-poly-SI_4737-D0H01ACXX	Liver	PRAD	-0.222336	0.000860961	Mesenchymal
MO_1022-capt-SI_4823-D0L3RACXX	Liver	CHOL	0.198356	0.00412909	Epithelial
MO_1022-poly-SI_4827-D0L3RACXX	Liver	CHOL	0.275009	1.4033e-05	Epithelial
MO_1027-capt-SI_4864-C0EMJACXX	Liver	CHOL	0.504925	3.24884e-18	Epithelial
MO_1027-poly-SI_4852-C0EMJACXX	Liver	CHOL	0.581064	2.34146e-24	Epithelial
MO_1031-capt-SI_5275-C0VU9ACXX	Liver	BRCA	0.339714	2.61888e-08	Epithelial
MO_1031-poly-SI_5256-C0VU9ACXX	Liver	BRCA	0.324555	1.30364e-07	Epithelial
MO_1033-capt-SI_4935-C0KFGACXX	Liver	COLO	0.0966513	0.439758	Intermediate
MO_1033-poly-SI_4926-C0KFGACXX	Liver	COLO	0.139303	0.0923963	Intermediate
MO_1036-capt-SI_4968-C0LARACXX	Liver	CHOL	0.153863	0.0476449	Epithelial
MO_1036-poly-SI_4963-C0KW0ACXX	Liver	CHOL	0.160072	0.0351843	Epithelial
MO_1037-capt-SI_4969-C0L92ACXX	Liver	PAAD	-0.0985783	0.415592	Intermediate
MO_1037-poly-SI_4964-C0KW0ACXX	Liver	PAAD	-0.11074	0.280972	Intermediate
MO_1039-capt-SI_4970-C0L92ACXX	Liver	CHOL	0.417352	2.04743e-12	Epithelial
MO_1039-poly-SI_4965-C0KRNACXX	Liver	CHOL	0.429257	3.96744e-13	Epithelial
MO_1042-capt-SI_5041-C0LARACXX	Liver	ACC	-0.179385	0.0126601	Mesenchymal
MO_1042-poly-SI_5026-C0LARACXX	Liver	ACC	-0.205935	0.00257167	Mesenchymal
MO_1050-capt-SI_5085-D0VDLACXX	Liver	OV	0.275694	1.33987e-05	Epithelial
MO_1050-poly-SI_5061-D0VDLACXX	Liver	OV	0.447114	3.06585e-14	Epithelial
MO_1051-capt-SI_5093-D0VCEACXX	Liver	BRCA	0.531946	2.89049e-20	Epithelial
MO_1051-poly-SI_5091-D0VCEACXX	Liver	BRCA	0.557254	2.55565e-22	Epithelial
MO_1055-capt-SI_5155-C0MHHACXX	Liver	HNSC	-0.13622	0.105563	Intermediate
MO_1055-poly-SI_5150-C0MHHACXX	Liver	HNSC	-0.126113	0.159589	Intermediate
MO_1059-capt-SI_5157-C0MHHACXX	Liver	PAAD	-0.0861168	0.585531	Intermediate
MO_1059-poly-SI_5151-C0MHHACXX	Liver	PAAD	-0.132751	0.12209	Intermediate
MO_1085-capt-SI_5556-D131EACXX	Liver	STAD	-0.428272	4.52632e-13	Mesenchymal
MO_1085-poly-SI_5552-D131EACXX	Liver	STAD	-0.446386	3.3664e-14	Mesenchymal
MO_1087-capt-SI_5598-D18NCACXX	Liver	COLO	0.631894	4.60671e-29	Epithelial
MO_1087-poly-SI_5589-D18NCACXX	Liver	COLO	0.675574	1.27617e-33	Epithelial
MO_1097-capt-SI_5686-C19D0ACXX	Liver	BLCA	0.533188	2.29967e-20	Epithelial
MO_1097-poly-SI_5666-C19D0ACXX	Liver	BLCA	0.574126	9.45151e-24	Epithelial
MO_1099-capt-SI_5832-C19FGACXX	Liver	BLCA	0.357828	3.47245e-09	Epithelial
MO_1099-poly-SI_5765-C19FGACXX	Liver	BLCA	0.388575	8.77493e-11	Epithelial
MO_1102-capt-SI_5833-C19FGACXX	Liver	THYM	0.289568	3.89645e-06	Epithelial
MO_1102-poly-SI_5854-C19KEACXX	Liver	THYM	0.265245	3.25171e-05	Epithelial
MO_1107-capt-SI_5841-C19M0ACXX	Liver	BRCA	0.471908	7.22778e-16	Epithelial
MO_1107-poly-SI_5773-C19M0ACXX	Liver	BRCA	0.46223	3.22273e-15	Epithelial
MO_1116-capt-SI_6073-D1EBFACXX	Liver	CHOL	0.694416	1.06333e-35	Epithelial
MO_1116-poly-SI_6060-D1EBFACXX	Liver	CHOL	0.714757	4.59603e-38	Epithelial
MO_1117-capt-SI_7207-D27AFACXX	Liver	HCC	-0.119861	0.202721	Intermediate
MO_1117-poly-SI_7200-D27AFACXX	Liver	HCC	-0.157545	0.0397848	Mesenchymal
MO_1118-capt-SI_6074-D1EC1ACXX	Liver	PRAD	0.397011	3.00556e-11	Epithelial
MO_1118-poly-SI_6061-D1EC1ACXX	Liver	PRAD	0.436451	1.43228e-13	Epithelial
MO_1126-capt-SI_6287-D1RTCACXX	Liver	BRCA	0.402706	1.4469e-11	Epithelial
MO_1129-capt-SI_6222-D1RWDACXX	Liver	BRCA	0.338472	2.99701e-08	Epithelial
MO_1147-capt-SI_6346-C1MY8ACXX	Liver	CHOL	-0.10316	0.360148	Intermediate
MO_1147-poly-SI_6331-C1MY8ACXX	Liver	CHOL	-0.087273	0.568211	Intermediate
MO_1152-capt-SI_6471-C1M1KACXX	Liver	CHOL	0.331492	6.32279e-08	Epithelial
MO_1152-poly-SI_6453-C1M58ACXX	Liver	CHOL	0.317575	2.64463e-07	Epithelial
MO_1153-capt-SI_6472-C1M1KACXX	Liver	BLCA	0.623458	3.04607e-28	Epithelial
MO_1153-poly-SI_6454-C1M58ACXX	Liver	BLCA	0.650737	5.63775e-31	Epithelial
MO_1159-capt-SI_6477-C1M1KACXX	Liver	BRCA	0.590485	3.45059e-25	Epithelial
MO_1159-poly-SI_6459-C1N0NACXX	Liver	BRCA	0.636862	1.46799e-29	Epithelial
MO_1160-capt-SI_6478-C1M1KACXX	Liver	MISC	0.125856	0.161212	Intermediate
MO_1160-poly-SI_6460-C1N0NACXX	Liver	MISC	0.111939	0.269725	Intermediate
MO_1161-capt-SI_6566-D1RV8ACXX	Liver	PRAD	0.491007	3.40239e-17	Epithelial
MO_1161-poly-SI_6554-D1RV8ACXX	Liver	PRAD	0.504882	3.30615e-18	Epithelial
MO_1163-capt-SI_6568-D1RV8ACXX	Liver	LUNG	0.580079	2.85917e-24	Epithelial
MO_1163-poly-SI_6555-D1RV8ACXX	Liver	LUNG	0.614551	2.03145e-27	Epithelial
MO_1167-capt-SI_6652-H0V81ADXX	Liver	BRCA	0.272739	1.7225e-05	Epithelial
MO_1168-capt-SI_6557-D1RV8ACXX	Liver	SARC	-0.444373	4.61899e-14	Mesenchymal
MO_1175-capt-SI_6640-H0V86ADXX	Liver	MISC	0.509892	1.38746e-18	Epithelial
MO_1175-poly-SI_6628-H0V86ADXX	Liver	MISC	0.552544	6.27923e-22	Epithelial
MO_1184-capt-SI_6706-H77P2ADXX	Liver	PRAD	0.193816	0.00548318	Epithelial
MO_1184-poly-SI_6695-H77P2ADXX	Liver	PRAD	0.184695	0.0093527	Epithelial
MO_1187-capt-SI_6797-H77P7ADXX	Liver	HNSC	0.543851	3.27031e-21	Epithelial
MO_1187-poly-SI_6767-H77P7ADXX	Liver	HNSC	0.587273	6.61263e-25	Epithelial
MO_1196-capt-SI_6905-H77PPADXX	Liver	STAD	-0.459018	5.20312e-15	Mesenchymal
MO_1196-poly-SI_6880-H77PPADXX	Liver	STAD	-0.518799	3.00528e-19	Mesenchymal
MO_1198-capt-SI_6907-H77T7ADXX	Liver	BLCA	0.234284	0.000366544	Epithelial
MO_1198-poly-SI_6882-H77T9ADXX	Liver	BLCA	0.287598	4.66338e-06	Epithelial
MO_1202-capt-SI_7596-D2GFBACXX	Liver	PRAD	0.399966	2.06508e-11	Epithelial
MO_1202-poly-SI_7585-D2GFBACXX	Liver	PRAD	0.427758	4.93164e-13	Epithelial
MO_1206-capt-SI_6969-C26D0ACXX	Liver	LUNG	0.285372	5.69971e-06	Epithelial
MO_1206-poly-SI_6951-C26D0ACXX	Liver	LUNG	0.335731	4.03583e-08	Epithelial
MO_1211-capt-SI_6982-C24VEACXX	Liver	SARC	-0.132794	0.12196	Intermediate
MO_1211-poly-SI_6977-C24VEACXX	Liver	SARC	-0.155618	0.0437898	Mesenchymal
MO_1213-capt-SI_7016-C26CMACXX	Liver	BRCA	0.31265	4.33869e-07	Epithelial
MO_1213-poly-SI_7008-C26CMACXX	Liver	BRCA	0.32357	1.44292e-07	Epithelial
MO_1230-capt-SI_7133-C25UAACXX	Liver	BRCA	0.411399	4.56109e-12	Epithelial
MO_1230-poly-SI_7117-C25UAACXX	Liver	BRCA	0.452081	1.46155e-14	Epithelial
MO_1233-capt-SI_7135-C25UAACXX	Liver	SECR	0.129325	0.140482	Intermediate
MO_1233-poly-SI_7119-C25UAACXX	Liver	SECR	0.147953	0.0628428	Intermediate
MO_1237-capt-SI_7190-C245WACXX	Liver	BRCA	0.1963	0.00471492	Epithelial
MO_1237-poly-SI_7185-C245WACXX	Liver	BRCA	0.235055	0.000344729	Epithelial
MO_1239-capt-SI_7209-C245WACXX	Liver	BRCA	0.601148	3.75666e-26	Epithelial
MO_1239-poly-SI_7202-C245WACXX	Liver	BRCA	0.638104	1.09452e-29	Epithelial
MO_1241-capt-SI_7212-C245WACXX	Liver	PRAD	0.567403	3.74286e-23	Epithelial
MO_1241-poly-SI_7203-C245WACXX	Liver	PRAD	0.573356	1.15606e-23	Epithelial
MO_1244-capt-SI_7263-C25YAACXX	Liver	PRAD	0.509378	1.52723e-18	Epithelial
MO_1244-poly-SI_7233-C25YAACXX	Liver	PRAD	0.519527	2.69942e-19	Epithelial
MO_1247-capt-SI_7265-C25YAACXX	Liver	BRCA	0.463472	2.66617e-15	Epithelial
MO_1247-poly-SI_7235-C25YAACXX	Liver	BRCA	0.464971	2.10051e-15	Epithelial
MO_1265-capt-SI_7545-C2G8GACXX	Liver	COLO	0.768328	8.70677e-45	Epithelial
MO_1265-poly-SI_7542-C2G8GACXX	Liver	COLO	0.786442	2.50545e-47	Epithelial
MO_1274-capt-SI_7600-D2GFBACXX	Liver	MISC	0.370461	8.02881e-10	Epithelial
MO_1274-poly-SI_7588-D2GFBACXX	Liver	MISC	0.370718	7.75729e-10	Epithelial
MO_1278-capt-SI_7603-C2G5LACXX	Liver	MISC	-0.523981	1.20024e-19	Mesenchymal
MO_1278-poly-SI_7591-C2G5LACXX	Liver	MISC	-0.578794	3.6797e-24	Mesenchymal
MO_1288-capt-SI_7733-C32VAACXX	Liver	BRCA	0.142986	0.0787142	Intermediate
MO_1288-poly-SI_7729-C32VAACXX	Liver	BRCA	0.16307	0.0302549	Epithelial
MO_1292-capt-SI_7736-C32VAACXX	Liver	BRCA	0.333762	4.95432e-08	Epithelial
MO_1292-poly-SI_7732-C32VAACXX	Liver	BRCA	0.351105	7.50687e-09	Epithelial
MO_1296-capt-SI_7845-C3Y81ACXX	Liver	CHOL	0.666881	1.14879e-32	Epithelial
MO_1296-poly-SI_7818-C3Y81ACXX	Liver	CHOL	0.693174	1.49368e-35	Epithelial
MO_1297-capt-SI_7846-C3Y81ACXX	Liver	STAD	-0.117891	0.218129	Intermediate
MO_1297-poly-SI_7819-C3Y81ACXX	Liver	STAD	-0.232057	0.000430749	Mesenchymal
MO_1305-capt-SI_7919-C4CRJACXX	Liver	BRCA	0.468696	1.17422e-15	Epithelial
MO_1305-poly-SI_7882-C4CRLACXX	Liver	BRCA	0.492249	2.77163e-17	Epithelial
MO_1306-capt-SI_7920-C4CRJACXX	Liver	TGCT	0.179171	0.0128345	Epithelial
MO_1306-poly-SI_7883-C4CRLACXX	Liver	TGCT	0.205978	0.00256998	Epithelial
MO_1310-capt-SI_7950-C4DCWACXX	Liver	SARC	-0.193046	0.00573684	Mesenchymal
MO_1310-poly-SI_7943-C4DCWACXX	Liver	SARC	-0.191076	0.00646007	Mesenchymal
MO_1312-capt-SI_7952-C4CW0ACXX	Liver	CHOL	0.595195	1.30946e-25	Epithelial
MO_1312-poly-SI_7945-C4CW0ACXX	Liver	CHOL	0.657717	1.02776e-31	Epithelial
MO_1313-capt-SI_7953-C475EANXX	Liver	SECR	-0.431954	2.7144e-13	Mesenchymal
MO_1324-capt-SI_8129-C4E6CACXX	Liver	BRCA	0.407931	7.21066e-12	Epithelial
MO_1324-poly-SI_8123-C4E6CACXX	Liver	BRCA	0.468953	1.11986e-15	Epithelial
MO_1325-capt-SI_8160-C4JLUACXX	Liver	LUNG	0.32554	1.17697e-07	Epithelial
MO_1325-poly-SI_8184-C4JLUACXX	Liver	LUNG	0.374957	4.59811e-10	Epithelial
MO_1335-capt-SI_8245-C471RANXX	Liver	BRCA	0.259592	5.16904e-05	Epithelial
MO_1335-poly-SI_8255-C471RANXX	Liver	BRCA	0.300017	1.47259e-06	Epithelial
MO_1337-capt-SI_8318-C46WVANXX	Liver	PRAD	0.378897	2.90704e-10	Epithelial
MO_1337-poly-SI_8294-C46WVANXX	Liver	PRAD	0.366735	1.24798e-09	Epithelial
MO_1338-capt-SI_8319-C46WVANXX	Liver	CHOL	0.663926	2.3608e-32	Epithelial
MO_1338-poly-SI_8295-C46WVANXX	Liver	CHOL	0.71253	8.2107e-38	Epithelial
MO_1355-capt-SI_8457-C4L7VACXX	Liver	BRCA	0.524752	1.05239e-19	Epithelial
MO_1355-poly-SI_8430-C4L7VACXX	Liver	BRCA	0.569887	2.29026e-23	Epithelial
MO_1359-capt-SI_8460-C4L7VACXX	Liver	BRCA	0.617506	1.13689e-27	Epithelial
MO_1359-poly-SI_8433-C4L7VACXX	Liver	BRCA	0.683753	1.6261e-34	Epithelial
MO_1364-capt-SI_8599-HAABDADXX	Liver	BRCA	0.238481	0.000269302	Epithelial
MO_1364-poly-SI_8568-HAABDADXX	Liver	BRCA	0.259806	5.09737e-05	Epithelial
MO_1375-capt-SI_8638-HAAACADXX	Liver	ESCA	0.627441	1.21114e-28	Epithelial
MO_1375-poly-SI_8615-HAAACADXX	Liver	ESCA	0.670606	4.42648e-33	Epithelial
MO_1376-capt-SI_8655-HAA98ADXX	Liver	CHOL	0.472165	6.87432e-16	Epithelial
MO_1376-poly-SI_8641-HAA98ADXX	Liver	CHOL	0.533445	2.17625e-20	Epithelial
MO_1377-capt-SI_8656-C59PDACXX	Liver	ACC	-0.337444	3.35576e-08	Mesenchymal
MO_1377-poly-SI_8642-C59PDACXX	Liver	ACC	-0.374144	5.15071e-10	Mesenchymal
MO_1380-capt-SI_8696-C46V9ANXX	Liver	ESCA	0.184438	0.0095011	Epithelial
MO_1380-poly-SI_8665-C46V9ANXX	Liver	ESCA	0.182939	0.0103617	Epithelial
MO_1383-capt-SI_8699-C5AD4ACXX	Liver	MISC	-0.303957	1.01232e-06	Mesenchymal
MO_1393-capt-SI_8845-C4730ANXX	Liver	OV	0.272225	1.80585e-05	Epithelial
MO_1393-poly-SI_8821-C4730ANXX	Liver	OV	0.276679	1.23015e-05	Epithelial
MO_1395-capt-SI_8847-C472VANXX	Liver	ESCA	-0.389774	7.53332e-11	Mesenchymal
MO_1395-poly-SI_8823-C472VANXX	Liver	ESCA	-0.395726	3.54099e-11	Mesenchymal
MO_1400-capt-SI_8889-C470TANXX	Liver	HNSC	0.316119	3.07103e-07	Epithelial
MO_1400-poly-SI_8861-C470TANXX	Liver	HNSC	0.344639	1.53572e-08	Epithelial
MO_1402-capt-SI_9128-C46PDANXX	Liver	CHOL	0.26229	4.15941e-05	Epithelial
MO_1410-capt-SI_9124-C4NPJANXX	Liver	PRAD	0.372945	5.9637e-10	Epithelial
MO_1410-poly-SI_9074-C46PDANXX	Liver	PRAD	0.299246	1.58616e-06	Epithelial
MO_1416-capt-SI_9228-C4R00ANXX	Liver	ESCA	0.695915	7.00628e-36	Epithelial
MO_1416-poly-SI_9193-C4R00ANXX	Liver	ESCA	0.735355	1.42499e-40	Epithelial
MO_1424-capt-SI_9381-C5N1GANXX	Liver	BRCA	0.570615	1.922e-23	Epithelial
MO_1424-poly-SI_9376-C5N1GANXX	Liver	BRCA	0.594424	1.50493e-25	Epithelial
MO_1428-capt-SI_9605-C5MGWANXX	Liver	MISC	0.14791	0.0630148	Intermediate
MO_1428-poly-SI_9579-C5MGWANXX	Liver	MISC	0.144741	0.0727044	Intermediate
MO_1434-capt-SI_9689-C5N0MANXX	Liver	ACC	-0.325026	1.2388e-07	Mesenchymal
MO_1434-poly-SI_9664-C5N0MANXX	Liver	ACC	-0.421035	1.23729e-12	Mesenchymal
MO_1435-capt-SI_9690-C5N0MANXX	Liver	BRCA	0.480601	1.80368e-16	Epithelial
MO_1435-poly-SI_9665-C5N0MANXX	Liver	BRCA	0.489294	4.38356e-17	Epithelial
MO_1437-capt-SI_9691-C5N0MANXX	Liver	PRAD	-0.095024	0.461012	Intermediate
MO_1437-poly-SI_9666-C5N0MANXX	Liver	PRAD	-0.102218	0.371466	Intermediate
MO_1439-capt-SI_9741-C5N0KANXX	Liver	BRCA	-0.143157	0.0780296	Intermediate
MO_1439-poly-SI_9737-C5N0KANXX	Liver	BRCA	-0.167223	0.0243951	Mesenchymal
MO_1448-capt-SI_9809-C5N31ANXX	Liver	CHOL	0.419108	1.58793e-12	Epithelial
MO_1448-poly-SI_9794-C5N31ANXX	Liver	CHOL	0.455293	9.16904e-15	Epithelial
MO_1454-capt-SI_9940-C6EJUANXX	Liver	BRCA	0.537898	9.7951e-21	Epithelial
MO_1454-poly-SI_9919-C6EJUANXX	Liver	BRCA	0.579565	3.28781e-24	Epithelial
MO_1460-capt-SI_9992-C6EL5ANXX	Liver	PRAD	0.366221	1.32207e-09	Epithelial
MO_1460-poly-SI_9988-C6EL5ANXX	Liver	PRAD	0.407417	7.80564e-12	Epithelial
MO_1462-capt-SI_10150-C6EHCANXX	Liver	HCC	-0.243191	0.000188834	Mesenchymal
MO_1462-poly-SI_10140-C6EHCANXX	Liver	HCC	-0.281132	8.31634e-06	Mesenchymal
MO_1466-capt-SI_10328-C6EHAANXX	Liver	PAAD	0.194073	0.00539828	Epithelial
MO_1466-poly-SI_10308-C6EHAANXX	Liver	PAAD	0.1787	0.0131733	Epithelial
MO_1476-capt-SI_10664-C6UPRANXX	Liver	HNSC	0.375171	4.57188e-10	Epithelial
MO_1476-poly-SI_10659-C6UPRANXX	Liver	HNSC	0.424546	7.63079e-13	Epithelial
MO_1477-capt-SI_10665-C6UPRANXX	Liver	ESCA	0.394741	4.01611e-11	Epithelial
MO_1477-poly-SI_10660-C6UPRANXX	Liver	ESCA	0.404933	1.08275e-11	Epithelial
MO_1480-capt-SI_10784-C6UV0ANXX	Liver	ESCA	0.335731	4.03583e-08	Epithelial
MO_1480-poly-SI_10779-C6UV0ANXX	Liver	ESCA	0.418551	1.73697e-12	Epithelial
MO_1482-capt-SI_11775-C7G8TANXX	Liver	PRAD	0.419322	1.58022e-12	Epithelial
MO_1482-poly-SI_11763-C7G8TANXX	Liver	PRAD	0.450839	1.76026e-14	Epithelial
MO_1485-capt-SI_10921-C6V1TANXX	Liver	CHOL	0.274195	1.5253e-05	Epithelial
MO_1485-poly-SI_10916-C6V1TANXX	Liver	CHOL	0.3392	2.78171e-08	Epithelial
MO_1486-capt-SI_10984-C6UWKANXX	Liver	PAAD	0.3747	4.77082e-10	Epithelial
MO_1486-poly-SI_10983-C6UWKANXX	Liver	PAAD	0.47983	2.04432e-16	Epithelial
MO_1489-capt-SI_11010-C6T3EANXX	Liver	HNSC	0.238224	0.00027449	Epithelial
MO_1489-poly-SI_11002-C6T3EANXX	Liver	HNSC	0.284387	6.2206e-06	Epithelial
MO_1491-capt-SI_11084-C6PF4ANXX	Liver	MISC	-0.285372	5.69971e-06	Mesenchymal
MO_1491-poly-SI_11080-C6PF4ANXX	Liver	MISC	-0.288326	4.36249e-06	Mesenchymal
MO_1494-capt-SI_11086-C6T5LANXX	Liver	PAAD	0.446386	3.3664e-14	Epithelial
MO_1494-poly-SI_11082-C6PF4ANXX	Liver	PAAD	0.542138	4.42665e-21	Epithelial
MO_1495-capt-SI_11221-C6UTYANXX	Liver	BRCA	0.38562	1.24906e-10	Epithelial
MO_1495-poly-SI_11204-C6UYMANXX	Liver	BRCA	0.469938	9.66302e-16	Epithelial
MO_1500-capt-SI_11308-C6V1BANXX	Liver	ESCA	0.300745	1.37662e-06	Epithelial
MO_1500-poly-SI_11299-C6V1BANXX	Liver	ESCA	0.38335	1.6869e-10	Epithelial
MO_1507-capt-SI_11424-C6UY8ANXX	Liver	MISC	0.554514	4.43942e-22	Epithelial
MO_1513-capt-SI_11383-HVGHMADXX	Liver	BRCA	0.52822	5.7223e-20	Epithelial
MO_1515-capt-SI_11438-HV7JNADXX	Liver	BRCA	0.525737	8.97899e-20	Epithelial
MO_1515-poly-SI_11431-HVGHMADXX	Liver	BRCA	0.569159	2.5243e-23	Epithelial
MO_1516-capt-SI_11439-HV7JNADXX	Liver	BRCA	0.431483	2.91558e-13	Epithelial
MO_1516-poly-SI_11432-HVGHMADXX	Liver	BRCA	0.47118	7.94877e-16	Epithelial
MO_1518-capt-SI_11513-C7A2UANXX	Liver	MISC	0.435466	1.63841e-13	Epithelial
MO_1518-poly-SI_11476-C7A2UANXX	Liver	MISC	0.473407	5.64557e-16	Epithelial
MO_1521-capt-SI_11539-C7GBMANXX	Liver	BRCA	-0.153135	0.0493404	Mesenchymal
MO_1521-poly-SI_11530-C7GBMANXX	Liver	BRCA	-0.171249	0.0197745	Mesenchymal
MO_1528-capt-SI_11541-C7GBMANXX	Liver	BRCA	0.301473	1.28347e-06	Epithelial
MO_1528-poly-SI_11532-C7GBMANXX	Liver	BRCA	0.364508	1.61828e-09	Epithelial
MO_1529-capt-SI_11729-C7G60ANXX	Liver	PAAD	0.0863738	0.581841	Intermediate
MO_1529-poly-SI_11687-C7G60ANXX	Liver	PAAD	-0.11271	0.262429	Intermediate
MO_1530-capt-SI_11730-C7G60ANXX	Liver	KDNY	-0.218868	0.00109354	Mesenchymal
MO_1530-poly-SI_11688-C7G60ANXX	Liver	KDNY	-0.236939	0.000301079	Mesenchymal
MO_1534-capt-SI_11904-C7F4VANXX	Liver	BRCA	0.562693	9.36234e-23	Epithelial
MO_1536-capt-SI_11944-C7G8DANXX	Liver	BRCA	-0.634635	2.36181e-29	Mesenchymal
MO_1541-capt-SI_12052-H53C5ADXX	Liver	PRAD	0.453794	1.14985e-14	Epithelial
MO_1543-capt-SI_12054-C7FVAANXX	Liver	PRAD	0.330764	6.83392e-08	Epithelial
MO_1550-capt-SI_12296-H523KADXX	Liver	CHOL	0.397225	2.92466e-11	Epithelial
MO_1551-capt-SI_12338-C7FN8ANXX	Liver	BRCA	0.476876	3.28599e-16	Epithelial
MO_1552-capt-SI_12339-H523TADXX	Liver	CHOL	0.418337	1.80104e-12	Epithelial
TP_2008-capt-SI_5933-D1E1PACXX	Liver	CHOL	-0.500942	6.41801e-18	Mesenchymal
TP_2011-capt-SI_5901-C19L8ACXX	Liver	KDNY	-0.353803	5.52158e-09	Mesenchymal
TP_2011-poly-SI_5874-C19L8ACXX	Liver	KDNY	-0.36271	1.98419e-09	Mesenchymal
TP_2013-capt-SI_5934-D1E4KACXX	Liver	SARC	-0.167523	0.0240676	Mesenchymal
TP_2013-poly-SI_5920-D1E4KACXX	Liver	SARC	-0.176944	0.0145234	Mesenchymal
TP_2024-capt-SI_6022-D1EBEACXX	Liver	LUNG	0.270726	2.0531e-05	Epithelial
TP_2024-poly-SI_6010-D1EBEACXX	Liver	LUNG	0.221137	0.000934092	Epithelial
TP_2025-capt-SI_6023-D1EBEACXX	Liver	BRCA	0.340442	2.43177e-08	Epithelial
TP_2025-poly-SI_6011-D1EBEACXX	Liver	BRCA	0.395298	3.6782e-11	Epithelial
TP_2038-capt-SI_6707-H0UUFADXX	Liver	CHOL	0.178229	0.0135022	Epithelial
TP_2038-poly-SI_6696-H0UUFADXX	Liver	CHOL	0.220624	0.000969459	Epithelial
TP_2083-capt-SI_10418-C6ET2ANXX	Liver	BRCA	0.370718	7.75729e-10	Epithelial
TP_2083-poly-SI_10415-C6ET2ANXX	Liver	BRCA	0.388789	8.52879e-11	Epithelial
TP_2086-capt-SI_10440-C6ERDANXX	Liver	PAAD	0.436708	1.37064e-13	Epithelial
TP_2086-poly-SI_10434-C6ET2ANXX	Liver	PAAD	0.498929	9.02172e-18	Epithelial
TP_2100-capt-SI_11011-HK2MMADXX	Liver	HNSC	0.194844	0.00514336	Epithelial
TP_2100-poly-SI_11003-HK2MMADXX	Liver	HNSC	0.283145	6.95238e-06	Epithelial
TP_2119-capt-SI_11548-C7GBMANXX	Liver	SARC	-0.470666	8.77919e-16	Mesenchymal
TP_2131-capt-SI_11906-C7F4VANXX	Liver	BLCA	0.392771	5.1868e-11	Epithelial
TP_2141-capt-SI_12056-H53C5ADXX	Liver	BRCA	-0.126542	0.156827	Intermediate
TP_2156-capt-SI_12477-C7G91ANXX	Liver	PRAD	0.313678	3.88582e-07	Epithelial
MO_1023-capt-SI_4824-D0L3RACXX	Lung	SARC	-0.129539	0.139274	Intermediate
MO_1023-poly-SI_4828-D0L3RACXX	Lung	SARC	-0.083419	0.624986	Intermediate
MO_1034-capt-SI_4976-C0L92ACXX	Lung	LUNG	0.220923	0.000943084	Epithelial
MO_1038-capt-SI_5040-C0LM6ACXX	Lung	SKCM	-0.524495	1.12249e-19	Mesenchymal
MO_1044-capt-SI_5056-D0UTEACXX	Lung	SECR	0.199597	0.00382212	Epithelial
MO_1044-poly-SI_5044-D0UTEACXX	Lung	SECR	0.285415	5.61281e-06	Epithelial
MO_1061-capt-SI_5159-C0MHHACXX	Lung	THYM	-0.12333	0.177769	Intermediate
MO_1061-poly-SI_5153-C0MHHACXX	Lung	THYM	-0.121103	0.193516	Intermediate
MO_1062-capt-SI_5161-C0MHHACXX	Lung	SECR	-0.544322	2.98188e-21	Mesenchymal
MO_1062-poly-SI_5154-C0MHHACXX	Lung	SECR	-0.549289	1.20119e-21	Mesenchymal
MO_1064-capt-SI_5216-C0VTMACXX	Lung	SECR	0.220152	0.000998622	Epithelial
MO_1064-poly-SI_5185-C0VTMACXX	Lung	SECR	0.243234	0.000187096	Epithelial
MO_1075-capt-SI_5932-D1E4FACXX	Lung	MISC	-0.539354	7.3671e-21	Mesenchymal
MO_1076-capt-SI_5501-D130HACXX	Lung	SARC	-0.680755	3.76694e-34	Mesenchymal
MO_1086-capt-SI_5557-D131EACXX	Lung	MISC	-0.388789	8.52879e-11	Mesenchymal
MO_1086-poly-SI_5553-D131EACXX	Lung	MISC	-0.445829	3.68905e-14	Mesenchymal
MO_1088-capt-SI_5831-C19FGACXX	Lung	SARC	-0.288155	4.37054e-06	Mesenchymal
MO_1095-capt-SI_5684-C19D0ACXX	Lung	PRAD	0.31736	2.71136e-07	Epithelial
MO_1095-poly-SI_5665-C19D0ACXX	Lung	PRAD	0.286828	4.99176e-06	Epithelial
MO_1098-capt-SI_5687-C19D0ACXX	Lung	COLO	0.529976	4.07862e-20	Epithelial
MO_1098-poly-SI_5667-C19D0ACXX	Lung	COLO	0.543123	3.68971e-21	Epithelial
MO_1123-poly-SI_6204-C1MR4ACXX	Lung	PAAD	0.684738	1.34538e-34	Epithelial
MO_1137-capt-SI_6232-D1RRKACXX	Lung	SARC	-0.433967	2.04613e-13	Mesenchymal
MO_1141-capt-SI_6290-D1RTCACXX	Lung	HNSC	0.116178	0.232027	Intermediate
MO_1141-poly-SI_6276-D1RTCACXX	Lung	HNSC	0.130567	0.133599	Intermediate
MO_1149-capt-SI_6357-C1MY8ACXX	Lung	SARC	-0.347379	1.13669e-08	Mesenchymal
MO_1172-capt-SI_6639-D21U5ACXX	Lung	PAAD	0.532203	2.72584e-20	Epithelial
MO_1172-poly-SI_6627-D21U5ACXX	Lung	PAAD	0.504411	3.60079e-18	Epithelial
MO_1193-capt-SI_6861-H77PRADXX	Lung	OV	0.322842	1.55079e-07	Epithelial
MO_1193-poly-SI_6852-H77PPADXX	Lung	OV	0.322842	1.55079e-07	Epithelial
MO_1209-capt-SI_6971-C26D0ACXX	Lung	LUNG	0.145512	0.0701214	Intermediate
MO_1209-poly-SI_6953-C26D0ACXX	Lung	LUNG	0.127655	0.149922	Intermediate
MO_1245-capt-SI_7264-C25YAACXX	Lung	SARC	-0.537898	9.7951e-21	Mesenchymal
MO_1245-poly-SI_7234-C25YAACXX	Lung	SARC	-0.571386	1.64569e-23	Mesenchymal
MO_1251-capt-SI_7544-C2G8GACXX	Lung	SARC	-0.331963	6.00083e-08	Mesenchymal
MO_1251-poly-SI_7541-C2G8GACXX	Lung	SARC	-0.353546	5.68127e-09	Mesenchymal
MO_1276-capt-SI_7601-C2G5LACXX	Lung	BRCA	0.143499	0.0768759	Intermediate
MO_1276-poly-SI_7589-C2G5LACXX	Lung	BRCA	0.199812	0.0037867	Epithelial
MO_1315-capt-SI_7992-C4CW0ACXX	Lung	LUNG	0.272225	1.80585e-05	Epithelial
MO_1322-capt-SI_8081-C4CUUACXX	Lung	ACC	-0.33693	3.53987e-08	Mesenchymal
MO_1331-capt-SI_8243-C471RANXX	Lung	HNSC	0.124657	0.168737	Intermediate
MO_1331-poly-SI_8253-C471RANXX	Lung	HNSC	0.222893	0.000824536	Epithelial
MO_1343-capt-SI_8462-C4L7VACXX	Lung	HNSC	-0.261519	4.42317e-05	Mesenchymal
MO_1369-capt-SI_8634-HAABFADXX	Lung	CHOL	0.0923261	0.497644	Intermediate
MO_1369-poly-SI_8611-HAABFADXX	Lung	CHOL	0.0950668	0.460848	Intermediate
MO_1373-capt-SI_8654-C59PDACXX	Lung	HNSC	-0.135534	0.108751	Intermediate
MO_1373-poly-SI_8640-C59PDACXX	Lung	HNSC	-0.143157	0.0780296	Intermediate
MO_1381-capt-SI_8697-C46V9ANXX	Lung	SARC	-0.102646	0.366227	Intermediate
MO_1382-capt-SI_8698-C46V9ANXX	Lung	SARC	-0.387376	9.96301e-11	Mesenchymal
MO_1382-poly-SI_8666-C46V9ANXX	Lung	SARC	-0.432768	2.35348e-13	Mesenchymal
MO_1408-capt-SI_9474-C5N19ANXX	Lung	SECR	0.409901	5.61003e-12	Epithelial
MO_1408-poly-SI_9468-C5N19ANXX	Lung	SECR	0.405661	9.7793e-12	Epithelial
MO_1423-capt-SI_9380-C5N1GANXX	Lung	MISC	-0.317146	2.75275e-07	Mesenchymal
MO_1423-poly-SI_9375-C5N1GANXX	Lung	MISC	-0.414097	3.18815e-12	Mesenchymal
MO_1449-capt-SI_9810-C5N31ANXX	Lung	SARC	-0.574812	8.3811e-24	Mesenchymal
MO_1449-poly-SI_9795-C5N31ANXX	Lung	SARC	-0.612282	3.32636e-27	Mesenchymal
MO_1464-capt-SI_10257-C6EJEANXX	Lung	OV	0.321086	1.86003e-07	Epithelial
MO_1464-poly-SI_10255-HBGT3ADXX	Lung	OV	0.272482	1.76437e-05	Epithelial
MO_1474-capt-SI_10595-C6JKTANXX	Lung	BRCA	-0.487753	5.65367e-17	Mesenchymal
MO_1475-capt-SI_10740-C6UUJANXX	Lung	SARC	-0.118362	0.214227	Intermediate
MO_1479-capt-SI_10783-C6UV0ANXX	Lung	SARC	-0.420564	1.33308e-12	Mesenchymal
MO_1479-poly-SI_10778-C6UV0ANXX	Lung	SARC	-0.506381	2.61388e-18	Mesenchymal
MO_1481-capt-SI_10785-C6UV0ANXX	Lung	SECR	-0.346351	1.26891e-08	Mesenchymal
MO_1483-capt-SI_10858-C6URJANXX	Lung	SARC	-0.573613	1.08008e-23	Mesenchymal
MO_1483-poly-SI_10841-C6URJANXX	Lung	SARC	-0.60907	7.06694e-27	Mesenchymal
MO_1484-capt-SI_10926-C6V1TANXX	Lung	SECR	-0.13956	0.0913363	Intermediate
MO_1502-capt-SI_11309-C6UY8ANXX	Lung	SECR	0.165296	0.027007	Epithelial
MO_1502-poly-SI_11300-C6UY8ANXX	Lung	SECR	0.194073	0.00539828	Epithelial
TP_2042-capt-SI_7076-C2560ACXX	Lung	MISC	0.18341	0.0101025	Epithelial
TP_2043-capt-SI_7127-D27KNACXX	Lung	SARC	-0.120418	0.198515	Intermediate
TP_2043-poly-SI_7112-D27KNACXX	Lung	SARC	-0.137804	0.0986106	Intermediate
TP_2047-capt-SI_7358-H80YAADXX	Lung	PAAD	0.308967	6.17552e-07	Epithelial
TP_2047-poly-SI_7305-H80YAADXX	Lung	PAAD	0.242763	0.000193054	Epithelial
TP_2101-capt-SI_11012-C6T3EANXX	Lung	HNSC	0.298304	1.71692e-06	Epithelial
TP_2101-poly-SI_11004-C6T3EANXX	Lung	HNSC	0.404719	1.08996e-11	Epithelial
MO_1013-poly-SI_4538-C0A6EACXX	Lymph_Node	PRAD	-0.115194	0.240372	Intermediate
MO_1014-poly-SI_4539-C0A6EACXX	Lymph_Node	PRAD	0.223621	0.000785719	Epithelial
MO_1015-capt-SI_4733-D0H01ACXX	Lymph_Node	PRAD	-0.108428	0.30378	Intermediate
MO_1015-poly-SI_4599-C07ECACXX	Lymph_Node	PRAD	-0.167266	0.0243894	Mesenchymal
MO_1016-capt-SI_4734-D0H01ACXX	Lymph_Node	BLCA	0.254411	7.79999e-05	Epithelial
MO_1016-poly-SI_4600-D0GPLACXX	Lymph_Node	BLCA	0.200026	0.00374565	Epithelial
MO_1017-poly-SI_4601-D0GPLACXX	Lymph_Node	THYM	0.211202	0.00182841	Epithelial
MO_1040-capt-SI_4971-C0L92ACXX	Lymph_Node	PRAD	0.411871	4.31244e-12	Epithelial
MO_1040-poly-SI_4966-C0KRNACXX	Lymph_Node	PRAD	0.351576	7.09884e-09	Epithelial
MO_1043-capt-SI_5055-D0UTEACXX	Lymph_Node	SECR	-0.225034	0.000711462	Mesenchymal
MO_1043-poly-SI_5043-D0UTEACXX	Lymph_Node	SECR	-0.210389	0.00192438	Mesenchymal
MO_1045-poly-SI_5090-D0VCEACXX	Lymph_Node	PAAD	0.258864	5.46272e-05	Epithelial
MO_1048-capt-SI_5058-D0UTEACXX	Lymph_Node	COLO	0.284901	5.9123e-06	Epithelial
MO_1048-poly-SI_5046-D0UTEACXX	Lymph_Node	COLO	0.302458	1.16742e-06	Epithelial
MO_1049-capt-SI_5084-D0VDLACXX	Lymph_Node	BLCA	0.307939	6.89048e-07	Epithelial
MO_1049-poly-SI_5060-D0VDLACXX	Lymph_Node	BLCA	0.363267	1.871e-09	Epithelial
MO_1060-capt-SI_5158-C0MHHACXX	Lymph_Node	OV	0.166538	0.0253283	Epithelial
MO_1060-poly-SI_5152-C0MHHACXX	Lymph_Node	OV	0.241692	0.000211516	Epithelial
MO_1065-capt-SI_5217-C0VTMACXX	Lymph_Node	BRCA	-0.184138	0.00969241	Mesenchymal
MO_1065-poly-SI_5186-C0VTMACXX	Lymph_Node	BRCA	0.192831	0.00581805	Epithelial
MO_1068-capt-SI_5219-C0VTYACXX	Lymph_Node	BRCA	0.488309	5.13165e-17	Epithelial
MO_1068-poly-SI_5188-C0VTYACXX	Lymph_Node	BRCA	0.45752	6.58246e-15	Epithelial
MO_1069-capt-SI_5276-C0VU9ACXX	Lymph_Node	BRCA	0.495718	1.56709e-17	Epithelial
MO_1069-poly-SI_5257-C0VU9ACXX	Lymph_Node	BRCA	0.494476	1.92391e-17	Epithelial
MO_1070-capt-SI_5315-C0VU9ACXX	Lymph_Node	SKCM	-0.518756	3.00667e-19	Mesenchymal
MO_1070-poly-SI_5281-C0VU9ACXX	Lymph_Node	SKCM	-0.534173	1.95881e-20	Mesenchymal
MO_1084-capt-SI_5555-D131EACXX	Lymph_Node	PRAD	0.581021	2.34277e-24	Epithelial
MO_1084-poly-SI_5551-D131EACXX	Lymph_Node	PRAD	0.513061	8.05711e-19	Epithelial
MO_1092-capt-SI_5603-D18NCACXX	Lymph_Node	MISC	0.369733	8.67921e-10	Epithelial
MO_1093-capt-SI_5683-C19D0ACXX	Lymph_Node	PRAD	-0.407631	7.53061e-12	Mesenchymal
MO_1093-poly-SI_5664-C19D0ACXX	Lymph_Node	PRAD	-0.380096	2.50301e-10	Mesenchymal
MO_1108-capt-SI_6356-C1N0NACXX	Lymph_Node	LUNG	0.657203	1.23947e-31	Epithelial
MO_1111-capt-SI_5897-D1DPVACXX	Lymph_Node	LUNG	0.345409	1.41178e-08	Epithelial
MO_1111-poly-SI_5870-D1DPVACXX	Lymph_Node	LUNG	0.355815	4.41003e-09	Epithelial
MO_1114-capt-SI_6072-D1EBFACXX	Lymph_Node	PRAD	0.415339	2.69965e-12	Epithelial
MO_1114-poly-SI_6059-D1EBFACXX	Lymph_Node	PRAD	0.392986	5.02896e-11	Epithelial
MO_1125-capt-SI_6219-C1MR4ACXX	Lymph_Node	LUNG	0.384849	1.39939e-10	Epithelial
MO_1125-poly-SI_6206-C1MR4ACXX	Lymph_Node	LUNG	0.429	4.14236e-13	Epithelial
MO_1128-poly-SI_6209-D1RWDACXX	Lymph_Node	PRAD	0.178657	0.0131962	Epithelial
MO_1131-capt-SI_6227-D1RWDACXX	Lymph_Node	SKCM	-0.484027	1.04037e-16	Mesenchymal
MO_1131-poly-SI_6273-C1MP5ACXX	Lymph_Node	SKCM	-0.480301	1.90318e-16	Mesenchymal
MO_1171-capt-SI_6642-D21U5ACXX	Lymph_Node	TGCT	-0.596394	1.00217e-25	Mesenchymal
MO_1176-capt-SI_6698-H15U7ADXX	Lymph_Node	PRAD	0.225077	0.000711192	Epithelial
MO_1176-poly-SI_6848-H77NYADXX	Lymph_Node	PRAD	0.298732	1.662e-06	Epithelial
MO_1178-capt-SI_6700-H0UUFADXX	Lymph_Node	BRCA	0.318131	2.50077e-07	Epithelial
MO_1178-poly-SI_6689-H0UUFADXX	Lymph_Node	BRCA	0.346394	1.26784e-08	Epithelial
MO_1188-capt-SI_6798-C33JEACXX	Lymph_Node	BRCA	0.284858	5.96909e-06	Epithelial
MO_1188-poly-SI_6768-H77PAADXX	Lymph_Node	BRCA	0.283402	6.78264e-06	Epithelial
MO_1189-capt-SI_6858-H77PAADXX	Lymph_Node	LUNG	0.280404	8.87465e-06	Epithelial
MO_1189-poly-SI_6849-H77PAADXX	Lymph_Node	LUNG	0.270726	2.0531e-05	Epithelial
MO_1192-capt-SI_6860-H77PFADXX	Lymph_Node	PRAD	0.426259	6.07214e-13	Epithelial
MO_1192-poly-SI_6851-H77PFADXX	Lymph_Node	PRAD	0.491478	3.06599e-17	Epithelial
MO_1195-capt-SI_6863-H77PRADXX	Lymph_Node	BRCA	0.477604	2.93867e-16	Epithelial
MO_1195-poly-SI_6854-H77PRADXX	Lymph_Node	BRCA	0.489765	4.17142e-17	Epithelial
MO_1197-capt-SI_6906-C2560ACXX	Lymph_Node	HNSC	0.424546	7.63079e-13	Epithelial
MO_1197-poly-SI_6881-H77T7ADXX	Lymph_Node	HNSC	0.45555	8.73698e-15	Epithelial
MO_1200-capt-SI_6936-C2560ACXX	Lymph_Node	PRAD	-0.339928	2.56812e-08	Mesenchymal
MO_1200-poly-SI_6932-C2560ACXX	Lymph_Node	PRAD	-0.273681	1.59207e-05	Mesenchymal
MO_1217-capt-SI_7072-C267GACXX	Lymph_Node	MISC	-0.427715	4.93343e-13	Mesenchymal
MO_1217-poly-SI_7067-C267GACXX	Lymph_Node	MISC	-0.457991	6.0188e-15	Mesenchymal
MO_1220-capt-SI_7074-C267GACXX	Lymph_Node	SARC	-0.384335	1.49096e-10	Mesenchymal
MO_1220-poly-SI_7069-C267GACXX	Lymph_Node	SARC	-0.398724	2.42273e-11	Mesenchymal
MO_1223-capt-SI_7125-C25YLACXX	Lymph_Node	HNSC	-0.139988	0.0898659	Intermediate
MO_1223-poly-SI_7110-C25YLACXX	Lymph_Node	HNSC	-0.0811494	0.658379	Intermediate
MO_1224-capt-SI_7126-C25YLACXX	Lymph_Node	BLCA	0.406689	8.50682e-12	Epithelial
MO_1224-poly-SI_7111-C25YLACXX	Lymph_Node	BLCA	0.522011	1.74621e-19	Epithelial
MO_1236-capt-SI_7208-C245WACXX	Lymph_Node	LUNG	0.404205	1.18195e-11	Epithelial
MO_1236-poly-SI_7201-C245WACXX	Lymph_Node	LUNG	0.320144	2.01473e-07	Epithelial
MO_1249-capt-SI_7267-D2GEDACXX	Lymph_Node	PRAD	0.360269	2.64322e-09	Epithelial
MO_1249-poly-SI_7237-D2GEDACXX	Lymph_Node	PRAD	0.324555	1.30364e-07	Epithelial
MO_1250-capt-SI_7353-D2GK3ACXX	Lymph_Node	LUNG	0.452338	1.39795e-14	Epithelial
MO_1250-poly-SI_7300-D2GK3ACXX	Lymph_Node	LUNG	0.45358	1.16042e-14	Epithelial
MO_1256-capt-SI_7402-D2GA6ACXX	Lymph_Node	ACC	-0.521754	1.80625e-19	Mesenchymal
MO_1256-poly-SI_7396-D2GA6ACXX	Lymph_Node	ACC	-0.550017	1.00731e-21	Mesenchymal
MO_1260-capt-SI_7403-D2GA6ACXX	Lymph_Node	PRAD	0.197028	0.00450707	Epithelial
MO_1260-poly-SI_7397-D2GA6ACXX	Lymph_Node	PRAD	0.204222	0.00287399	Epithelial
MO_1262-capt-SI_7404-C2GDFACXX	Lymph_Node	PRAD	0.470409	9.09145e-16	Epithelial
MO_1262-poly-SI_7398-C2GDFACXX	Lymph_Node	PRAD	0.461459	3.56145e-15	Epithelial
MO_1263-capt-SI_7405-D2GA6ACXX	Lymph_Node	PRAD	-0.0722422	0.786246	Intermediate
MO_1266-capt-SI_7570-C2G8GACXX	Lymph_Node	BRCA	0.32828	8.86278e-08	Epithelial
MO_1266-poly-SI_7558-C2G8GACXX	Lymph_Node	BRCA	0.287127	4.84635e-06	Epithelial
MO_1271-capt-SI_7597-D2GFBACXX	Lymph_Node	BRCA	0.289354	3.96523e-06	Epithelial
MO_1271-poly-SI_7586-D2GFBACXX	Lymph_Node	BRCA	0.295307	2.29111e-06	Epithelial
MO_1272-capt-SI_7740-C32VAACXX	Lymph_Node	KDNY	-0.254582	7.76128e-05	Mesenchymal
MO_1279-capt-SI_7633-C2G5LACXX	Lymph_Node	COLO	-0.12333	0.177769	Intermediate
MO_1285-capt-SI_7659-D2GGHACXX	Lymph_Node	MISC	0.192103	0.00607302	Epithelial
MO_1285-poly-SI_7656-D2GGHACXX	Lymph_Node	MISC	0.0794793	0.682814	Intermediate
MO_1286-capt-SI_7685-C33JEACXX	Lymph_Node	LUNG	0.216684	0.0012644	Epithelial
MO_1286-poly-SI_7678-C33JEACXX	Lymph_Node	LUNG	0.252869	8.90322e-05	Epithelial
MO_1287-capt-SI_7686-C33JEACXX	Lymph_Node	BRCA	0.469424	1.06516e-15	Epithelial
MO_1287-poly-SI_7679-C33JEACXX	Lymph_Node	BRCA	0.488995	4.61075e-17	Epithelial
MO_1290-capt-SI_7735-C32VAACXX	Lymph_Node	BLCA	0.329779	7.57395e-08	Epithelial
MO_1290-poly-SI_7731-C32VAACXX	Lymph_Node	BLCA	0.287384	4.72049e-06	Epithelial
MO_1294-capt-SI_7777-C3L7FACXX	Lymph_Node	LUNG	0.40943	5.86331e-12	Epithelial
MO_1294-poly-SI_7771-C3L7FACXX	Lymph_Node	LUNG	0.281903	7.76608e-06	Epithelial
MO_1316-capt-SI_7993-C4CW0ACXX	Lymph_Node	PRAD	0.409644	5.81384e-12	Epithelial
MO_1316-poly-SI_7956-C4CW0ACXX	Lymph_Node	PRAD	0.417823	1.93257e-12	Epithelial
MO_1317-capt-SI_7994-C4CW0ACXX	Lymph_Node	BRCA	0.43765	1.20285e-13	Epithelial
MO_1317-poly-SI_7957-C475EANXX	Lymph_Node	BRCA	0.443345	5.31323e-14	Epithelial
MO_1318-capt-SI_7995-C4CW0ACXX	Lymph_Node	BRCA	0.323827	1.40433e-07	Epithelial
MO_1318-poly-SI_7958-C4CW0ACXX	Lymph_Node	BRCA	0.332777	5.47779e-08	Epithelial
MO_1328-capt-SI_8162-C4JLUACXX	Lymph_Node	HNSC	0.353589	5.67636e-09	Epithelial
MO_1328-poly-SI_8185-C4JLUACXX	Lymph_Node	HNSC	0.428743	4.30097e-13	Epithelial
MO_1333-capt-SI_8244-C471RANXX	Lymph_Node	TGCT	0.362025	2.1618e-09	Epithelial
MO_1333-poly-SI_8254-C471RANXX	Lymph_Node	TGCT	0.397482	2.8406e-11	Epithelial
MO_1339-capt-SI_8320-C46WVANXX	Lymph_Node	PRAD	0.173219	0.017791	Epithelial
MO_1339-poly-SI_8296-C46WVANXX	Lymph_Node	PRAD	0.180456	0.011928	Epithelial
MO_1346-capt-SI_8387-C46LAANXX	Lymph_Node	SECR	-0.347122	1.16813e-08	Mesenchymal
MO_1346-poly-SI_8379-C46LAANXX	Lymph_Node	SECR	-0.362753	1.98415e-09	Mesenchymal
MO_1347-capt-SI_8388-C46LAANXX	Lymph_Node	CHOL	0.363738	1.76671e-09	Epithelial
MO_1347-poly-SI_8380-C46LAANXX	Lymph_Node	CHOL	0.367463	1.14282e-09	Epithelial
MO_1363-capt-SI_8555-C59M2ACXX	Lymph_Node	MISC	0.381381	2.14238e-10	Epithelial
MO_1363-poly-SI_8526-C59M2ACXX	Lymph_Node	MISC	0.376199	3.95419e-10	Epithelial
MO_1367-capt-SI_8602-HAABLADXX	Lymph_Node	HNSC	-0.203708	0.00296599	Mesenchymal
MO_1367-poly-SI_8570-HAABLADXX	Lymph_Node	HNSC	-0.151336	0.0536099	Intermediate
MO_1378-capt-SI_8657-C59PDACXX	Lymph_Node	OV	0.261305	4.50962e-05	Epithelial
MO_1378-poly-SI_8643-C59PDACXX	Lymph_Node	OV	0.301987	1.22308e-06	Epithelial
MO_1397-capt-SI_8886-C4739ANXX	Lymph_Node	LUNG	-0.103717	0.35444	Intermediate
MO_1407-capt-SI_9049-C472BANXX	Lymph_Node	MISC	-0.315819	3.14887e-07	Mesenchymal
MO_1407-poly-SI_8979-C472BANXX	Lymph_Node	MISC	-0.324255	1.33763e-07	Mesenchymal
MO_1412-capt-SI_9225-C4R00ANXX	Lymph_Node	SKCM	-0.480301	1.90318e-16	Mesenchymal
MO_1412-poly-SI_9190-C4R00ANXX	Lymph_Node	SKCM	-0.499657	7.93256e-18	Mesenchymal
MO_1418-capt-SI_9313-C5N2AANXX	Lymph_Node	BRCA	0.306954	7.58054e-07	Epithelial
MO_1418-poly-SI_9308-HAKJHADXX	Lymph_Node	BRCA	0.317103	2.78051e-07	Epithelial
MO_1425-capt-SI_9475-C5N19ANXX	Lymph_Node	BRCA	0.604102	1.99007e-26	Epithelial
MO_1425-poly-SI_9469-C5N19ANXX	Lymph_Node	BRCA	0.597422	8.41454e-26	Epithelial
MO_1433-capt-SI_9688-C5N0MANXX	Lymph_Node	LUNG	0.201482	0.0034154	Epithelial
MO_1433-poly-SI_9663-C5N0MANXX	Lymph_Node	LUNG	0.196771	0.00457628	Epithelial
MO_1447-capt-SI_9808-C5N31ANXX	Lymph_Node	PRAD	0.407888	7.27512e-12	Epithelial
MO_1447-poly-SI_9793-C5N31ANXX	Lymph_Node	PRAD	0.426987	5.43168e-13	Epithelial
MO_1452-capt-SI_9868-C67VYANXX	Lymph_Node	OV	-0.16945	0.0217002	Mesenchymal
MO_1452-poly-SI_9864-C67VYANXX	Lymph_Node	OV	-0.185337	0.00902721	Mesenchymal
MO_1453-capt-SI_9939-C6EJUANXX	Lymph_Node	HNSC	0.207006	0.00239892	Epithelial
MO_1453-poly-SI_9918-C6EJUANXX	Lymph_Node	HNSC	0.274966	1.42393e-05	Epithelial
MO_1459-capt-SI_9991-C6EL5ANXX	Lymph_Node	ESCA	0.324597	1.28283e-07	Epithelial
MO_1459-poly-SI_9987-C6EL5ANXX	Lymph_Node	ESCA	0.40746	7.53684e-12	Epithelial
MO_1472-capt-SI_10663-C6UPRANXX	Lymph_Node	PRAD	0.204736	0.00278272	Epithelial
MO_1472-poly-SI_10658-C6UPRANXX	Lymph_Node	PRAD	0.142943	0.0788971	Intermediate
MO_1478-capt-SI_10741-C6UUJANXX	Lymph_Node	PAAD	-0.147139	0.0652232	Intermediate
MO_1487-capt-SI_11008-C6T3EANXX	Lymph_Node	MISC	-0.554985	3.95877e-22	Mesenchymal
MO_1487-poly-SI_11000-C6T3EANXX	Lymph_Node	MISC	-0.576053	6.49713e-24	Mesenchymal
MO_1496-capt-SI_11307-C6V1BANXX	Lymph_Node	PRAD	0.41808	1.87166e-12	Epithelial
MO_1496-poly-SI_11298-C6V1BANXX	Lymph_Node	PRAD	0.441889	6.62327e-14	Epithelial
MO_1503-capt-SI_11316-C6UY8ANXX	Lymph_Node	BRCA	-0.123073	0.17948	Intermediate
MO_1506-capt-SI_11423-HV75LADXX	Lymph_Node	ESCA	0.51456	6.34596e-19	Epithelial
MO_1510-capt-SI_11368-C6UVMANXX	Lymph_Node	PRAD	0.408873	6.3859e-12	Epithelial
MO_1510-poly-SI_11361-C6UVMANXX	Lymph_Node	PRAD	0.434181	1.97394e-13	Epithelial
MO_1511-capt-SI_11382-C6UVMANXX	Lymph_Node	PRAD	-0.18341	0.0101025	Mesenchymal
MO_1511-poly-SI_11362-C6UVMANXX	Lymph_Node	PRAD	-0.162256	0.0314633	Mesenchymal
MO_1514-capt-SI_11384-C6UVMANXX	Lymph_Node	PRAD	0.329008	8.20336e-08	Epithelial
MO_1514-poly-SI_11363-C6UVMANXX	Lymph_Node	PRAD	0.346351	1.26891e-08	Epithelial
MO_1522-capt-SI_11540-C7GBMANXX	Lymph_Node	KDNY	-0.197028	0.00450707	Mesenchymal
MO_1522-poly-SI_11531-C7GBMANXX	Lymph_Node	KDNY	-0.222593	0.000846004	Mesenchymal
MO_1524-capt-SI_11625-C7G67ANXX	Lymph_Node	BRCA	0.117463	0.221248	Intermediate
MO_1532-capt-SI_11826-C7F4VANXX	Lymph_Node	SECR	0.176944	0.0145234	Epithelial
MO_1537-capt-SI_12026-C7FVYANXX	Lymph_Node	BRCA	-0.0886005	0.549768	Intermediate
MO_1542-capt-SI_12053-H53CHADXX	Lymph_Node	MISC	0.219896	0.0010177	Epithelial
MO_1547-capt-SI_12195-C7FVAANXX	Lymph_Node	SECR	0.169493	0.0216987	Epithelial
MO_1553-capt-SI_12340-C7FN8ANXX	Lymph_Node	PRAD	0.351319	7.30266e-09	Epithelial
MO_1556-capt-SI_12473-C7G91ANXX	Lymph_Node	PRAD	0.417052	2.13622e-12	Epithelial
MO_1556-poly-SI_12472-C7G91ANXX	Lymph_Node	PRAD	0.430242	3.47659e-13	Epithelial
MO_1557-capt-SI_12474-C7G91ANXX	Lymph_Node	BRCA	0.28807	4.46139e-06	Epithelial
MO_1558-capt-SI_12475-C7G91ANXX	Lymph_Node	LUNG	0.27321	1.66033e-05	Epithelial
TP_2001-capt-SI_5688-C19FAACXX	Lymph_Node	PRAD	0.34117	2.24486e-08	Epithelial
TP_2001-poly-SI_5668-C19FAACXX	Lymph_Node	PRAD	0.321086	1.86003e-07	Epithelial
TP_2010-capt-SI_5900-C19L8ACXX	Lymph_Node	PRAD	0.376884	3.70279e-10	Epithelial
TP_2010-poly-SI_5873-C19L8ACXX	Lymph_Node	PRAD	0.411143	4.75067e-12	Epithelial
TP_2015-capt-SI_6027-D1E7VACXX	Lymph_Node	BRCA	0.120889	0.195082	Intermediate
TP_2016-capt-SI_5943-D1E2BACXX	Lymph_Node	CHOL	0.262333	4.11722e-05	Epithelial
TP_2016-poly-SI_5927-D1E2BACXX	Lymph_Node	CHOL	0.393285	4.85082e-11	Epithelial
TP_2021-capt-SI_6020-D1EBEACXX	Lymph_Node	BLCA	-0.0927972	0.491045	Intermediate
TP_2021-poly-SI_6008-D1EBEACXX	Lymph_Node	BLCA	-0.130096	0.136108	Intermediate
TP_2037-capt-SI_6791-H77P6ADXX	Lymph_Node	PRAD	-0.217626	0.00119003	Mesenchymal
TP_2054-capt-SI_7848-C3Y81ACXX	Lymph_Node	PRAD	-0.120846	0.195338	Intermediate
TP_2054-poly-SI_7821-C3Y81ACXX	Lymph_Node	PRAD	-0.110954	0.279026	Intermediate
TP_2059-capt-SI_8390-C46LAANXX	Lymph_Node	MISC	0.429	4.14236e-13	Epithelial
TP_2059-poly-SI_8382-C46LAANXX	Lymph_Node	MISC	0.448613	2.43567e-14	Epithelial
TP_2060-capt-SI_8398-C4L1DACXX	Lymph_Node	PRAD	-0.143457	0.0771211	Intermediate
TP_2060-poly-SI_8407-C4JU8ACXX	Lymph_Node	PRAD	-0.129539	0.139274	Intermediate
TP_2064-capt-SI_8556-C59M0ACXX	Lymph_Node	PRAD	0.264003	3.6047e-05	Epithelial
TP_2064-poly-SI_8527-C59M0ACXX	Lymph_Node	PRAD	0.292095	3.07221e-06	Epithelial
TP_2069-capt-SI_9383-C5N1GANXX	Lymph_Node	PRAD	0.261305	4.50962e-05	Epithelial
TP_2069-poly-SI_9377-C5N1GANXX	Lymph_Node	PRAD	0.223835	0.000775867	Epithelial
TP_2073-capt-SI_9869-C67VYANXX	Lymph_Node	LUNG	-0.304	1.00251e-06	Mesenchymal
TP_2073-poly-SI_9865-C67VYANXX	Lymph_Node	LUNG	-0.291538	3.24805e-06	Mesenchymal
TP_2074-capt-SI_10259-C6EJEANXX	Lymph_Node	OV	-0.337187	3.44647e-08	Mesenchymal
TP_2077-capt-SI_10153-C6EHCANXX	Lymph_Node	PRAD	0.367677	1.11106e-09	Epithelial
TP_2077-poly-SI_10142-C6EHCANXX	Lymph_Node	PRAD	0.344853	1.49483e-08	Epithelial
TP_2078-capt-SI_10154-C6EHCANXX	Lymph_Node	PRAD	0.47983	2.04432e-16	Epithelial
TP_2078-poly-SI_10143-C6EHCANXX	Lymph_Node	PRAD	0.48604	7.62946e-17	Epithelial
TP_2093-capt-SI_10699-C6V2AANXX	Lymph_Node	PRAD	0.42005	1.42117e-12	Epithelial
TP_2093-poly-SI_10697-C6V2AANXX	Lymph_Node	PRAD	0.454779	9.854e-15	Epithelial
TP_2096-capt-SI_10732-C6UUJANXX	Lymph_Node	PRAD	0.421035	1.23729e-12	Epithelial
TP_2096-poly-SI_10724-C6UUJANXX	Lymph_Node	PRAD	0.431954	2.7144e-13	Epithelial
TP_2109-capt-SI_11420-C6UUUANXX	Lymph_Node	BRCA	0.387076	1.06262e-10	Epithelial
TP_2109-poly-SI_11372-C6UUUANXX	Lymph_Node	BRCA	0.375428	4.41808e-10	Epithelial
TP_2118-capt-SI_11547-C7GBMANXX	Lymph_Node	BRCA	-0.113952	0.251221	Intermediate
TP_2122-capt-SI_11543-C7GBMANXX	Lymph_Node	BRCA	-0.208162	0.00222633	Mesenchymal
TP_2122-poly-SI_11534-C7GBMANXX	Lymph_Node	BRCA	-0.166752	0.0250338	Mesenchymal
