# Supplementary material
Source: Research Square preprint supplement (doi:10.21203/rs.3.rs-8991205/v1)
Supplement: Supplementary file 5 [file abb9ae7ec79a86383f13a9a2.xlsx]

## Sheet: All_DDR_Genes
GeneName	Pathway	NT2.5	NT2.5LM	NT2.5LV	log2FC_LM_vs_NT2.5	log2FC_LV_vs_NT2.5	FoldChange_LM	FoldChange_LV	Change_LM	Change_LV
Chek1	Cell Cycle Checkpoints	5.62888	4.11674	5.68464	-1.51214	0.055761	0.350591	1.03941	Down	Unchanged
Atm	Cell Cycle Checkpoints	5.62138	5.42085	5.26375	-0.200533	-0.357635	0.870229	0.780443	Unchanged	Unchanged
Chek2	Cell Cycle Checkpoints	3.44426	3.46289	3.68584	0.0186221	0.24158	1.01299	1.18229	Unchanged	Unchanged
Atrip	Cell Cycle Checkpoints	3.43539	3.82158	3.65313	0.386198	0.217739	1.30694	1.16291	Unchanged	Unchanged
Atr	Cell Cycle Checkpoints	5.13537	5.5915	5.60336	0.456124	0.467991	1.37185	1.38318	Unchanged	Unchanged
Atmin	Cell Cycle Checkpoints	5.11518	5.71009	4.85245	0.594915	-0.262734	1.51038	0.833507	Up	Unchanged
Atraid	Cell Cycle Checkpoints	4.60608	5.70547	5.07616	1.09938	0.470075	2.14263	1.38518	Up	Unchanged
Bach1	Chromatin Remodeling	6.02904	5.76884	6.23061	-0.260198	0.20157	0.834973	1.14995	Unchanged	Unchanged
Atrx	Chromatin Remodeling	7.57551	7.88136	8.21385	0.305851	0.638341	1.23615	1.55654	Unchanged	Up
Atrnl1	Chromatin Remodeling	6.30603	6.90065	6.67872	0.594625	0.372693	1.51008	1.29477	Up	Unchanged
Atrn	Chromatin Remodeling	6.37498	7.03783	6.50893	0.662854	0.133948	1.58321	1.09729	Up	Unchanged
Pcna	DNA Replication	8.88265	7.21934	8.70351	-1.66331	-0.179139	0.315714	0.88323	Down	Unchanged
Rfc4	DNA Replication	5.51656	4.02595	5.33887	-1.49061	-0.177683	0.355862	0.884122	Down	Unchanged
Rfc5	DNA Replication	6.44443	4.96379	6.27872	-1.48063	-0.165709	0.358332	0.89149	Down	Unchanged
Rfc2	DNA Replication	7.00681	6.00728	6.77651	-0.999528	-0.230297	0.500164	0.852459	Down	Unchanged
Rfc1	DNA Replication	7.33874	6.34131	6.78301	-0.997427	-0.555728	0.500892	0.680313	Down	Down
Rfc3	DNA Replication	5.98884	4.99203	5.99229	-0.996806	0.00344898	0.501108	1.00239	Down	Unchanged
Rpap3	DNA Replication	5.02213	4.76312	4.90843	-0.259004	-0.113693	0.835665	0.924219	Unchanged	Unchanged
Rpap2	DNA Replication	3.95484	3.75277	3.40904	-0.202078	-0.545807	0.869298	0.685008	Unchanged	Down
Rpap1	DNA Replication	5.21202	5.27133	4.84696	0.0593178	-0.365054	1.04197	0.77644	Unchanged	Unchanged
Rpain	DNA Replication	3.25639	3.68815	3.48401	0.43176	0.227617	1.34888	1.1709	Unchanged	Unchanged
Exo1	Homologous Recombination	5.78918	3.78013	5.24868	-2.00905	-0.540501	0.248437	0.687532	Down	Down
Rad51ap1	Homologous Recombination	5.0569	3.06477	4.95657	-1.99213	-0.100334	0.251367	0.932817	Down	Unchanged
Brip1	Homologous Recombination	5.41494	3.65878	5.31281	-1.75616	-0.102127	0.296036	0.931658	Down	Unchanged
Brca1	Homologous Recombination	6.45495	4.89826	6.22182	-1.55669	-0.233129	0.33993	0.850788	Down	Unchanged
Rpa2	Homologous Recombination	5.4798	4.02573	5.3179	-1.45406	-0.161901	0.364992	0.893847	Down	Unchanged
Rad51	Homologous Recombination	6.65569	5.20649	6.09638	-1.44919	-0.559306	0.366226	0.678628	Down	Down
Rad51b	Homologous Recombination	3.42031	2.08492	3.49403	-1.33539	0.0737191	0.396284	1.05243	Down	Unchanged
Palb2	Homologous Recombination	2.48276	1.20089	2.67442	-1.28187	0.191659	0.411261	1.14208	Down	Unchanged
Mre11a	Homologous Recombination	6.59636	5.37228	6.43518	-1.22408	-0.161183	0.428072	0.894291	Down	Unchanged
Rad54b	Homologous Recombination	3.67098	2.52172	3.56096	-1.14926	-0.110021	0.450855	0.926575	Down	Unchanged
Bard1	Homologous Recombination	5.00338	3.96994	5.30364	-1.03344	0.300258	0.488545	1.23136	Down	Unchanged
Rpa1	Homologous Recombination	7.96303	7.01138	7.48396	-0.951654	-0.479077	0.517039	0.717436	Down	Unchanged
Rad54l	Homologous Recombination	4.2734	3.3958	4.17959	-0.877599	-0.0938048	0.544273	0.937048	Down	Unchanged
Rad51c	Homologous Recombination	4.39837	3.53689	4.38916	-0.861486	-0.00921144	0.550385	0.993635	Down	Unchanged
Brip1os	Homologous Recombination	7.42878	6.65835	7.43101	-0.770435	0.00222996	0.586241	1.00155	Down	Unchanged
Brca2	Homologous Recombination	5.21917	4.5661	5.23333	-0.653077	0.0141574	0.635923	1.00986	Down	Unchanged
Rpa3	Homologous Recombination	4.72484	4.32783	5.24733	-0.397009	0.522495	0.759431	1.43644	Unchanged	Up
Rad50	Homologous Recombination	6.3407	6.17753	6.26102	-0.163165	-0.0796729	0.893064	0.946272	Unchanged	Unchanged
Nbn	Homologous Recombination	4.7706	4.70827	4.82803	-0.062331	0.0574242	0.957715	1.04061	Unchanged	Unchanged
Rad51d	Homologous Recombination	4.2711	4.9507	4.4296	0.679599	0.158503	1.60169	1.11613	Up	Unchanged
Rad54l2	Homologous Recombination	5.08194	5.93024	5.72495	0.848299	0.643004	1.80038	1.56158	Up	Up
Mycbp	MYC Family	4.25474	2.73277	4.01162	-1.52197	-0.243124	0.34821	0.844914	Down	Unchanged
Myc	MYC Family	7.25356	6.80759	6.21824	-0.445968	-1.03532	0.734092	0.487909	Unchanged	Down
Mycbpap	MYC Family	2.10956	2.12827	2.08546	0.018709	-0.0241021	1.01305	0.983432	Unchanged	Unchanged
Mycbp2	MYC Family	6.8103	7.09778	6.74489	0.287479	-0.0654107	1.22051	0.955673	Unchanged	Unchanged
Mycn	MYC Family	-2.07451	1.11864	2.85156	3.19315	4.92608	9.14607	30.4016	Up	Up
Msh6	Mismatch Repair	6.66227	5.93233	6.56768	-0.729949	-0.094591	0.602925	0.936538	Down	Unchanged
Pms2	Mismatch Repair	4.5543	3.84074	4.28862	-0.713562	-0.265682	0.609813	0.831806	Down	Unchanged
Msh3	Mismatch Repair	4.28548	3.68542	3.89542	-0.600066	-0.390064	0.659724	0.763096	Down	Unchanged
Mlh1	Mismatch Repair	4.25745	3.93625	4.52963	-0.321197	0.272184	0.800405	1.20763	Unchanged	Unchanged
Msh2	Mismatch Repair	5.64006	5.47322	5.73823	-0.166846	0.098165	0.890788	1.07041	Unchanged	Unchanged
Mlh3	Mismatch Repair	4.58289	4.92044	4.88334	0.33755	0.300447	1.26361	1.23153	Unchanged	Unchanged
Parpbp	PARP Family	5.07182	3.68722	5.48934	-1.38461	0.417517	0.382994	1.33563	Down	Unchanged
Parp1	PARP Family	7.29371	6.70773	7.08191	-0.585982	-0.211799	0.666196	0.86346	Down	Unchanged
Parp2	PARP Family	4.89964	4.51871	5.31228	-0.380927	0.412635	0.767944	1.33112	Unchanged	Unchanged
Parp12	PARP Family	6.03141	6.0737	5.41825	0.042291	-0.613158	1.02975	0.653764	Unchanged	Down
Parp11	PARP Family	4.29356	4.38033	3.51634	0.0867664	-0.777216	1.06199	0.583491	Unchanged	Down
Parp8	PARP Family	4.26405	4.49879	4.21014	0.234735	-0.0539094	1.17669	0.963322	Unchanged	Unchanged
Parp16	PARP Family	3.67326	3.91035	4.61061	0.23709	0.937349	1.17861	1.91501	Unchanged	Up
Parp9	PARP Family	5.49626	5.79612	5.41418	0.299855	-0.0820797	1.23102	0.944695	Unchanged	Unchanged
Parp3	PARP Family	4.34041	4.97032	4.83053	0.629919	0.490126	1.54748	1.40457	Up	Unchanged
Parp4	PARP Family	5.69062	6.33469	5.79527	0.644071	0.104651	1.56273	1.07523	Up	Unchanged
Parp14	PARP Family	4.39505	5.15087	4.13022	0.755823	-0.264831	1.68859	0.832296	Up	Unchanged
Parp6	PARP Family	3.95892	4.872	4.25464	0.913085	0.295727	1.88307	1.2275	Up	Unchanged
Parp10	PARP Family	5.58402	6.57366	5.0688	0.989639	-0.515221	1.98569	0.699686	Up	Down
Ikbke	cGAS-STING Pathway	5.71482	4.84142	5.1602	-0.873402	-0.554626	0.545858	0.680834	Down	Down
Tbk1	cGAS-STING Pathway	5.77759	5.1678	5.37133	-0.60979	-0.406259	0.655292	0.754577	Down	Unchanged
Oas3	cGAS-STING Pathway	3.96149	3.67842	1.98742	-0.283076	-1.97408	0.821837	0.254532	Unchanged	Down
Nfkb1	cGAS-STING Pathway	7.14066	6.89496	7.21858	-0.245706	0.0779148	0.843403	1.05549	Unchanged	Unchanged
Nfkbia	cGAS-STING Pathway	5.95568	5.79327	5.54328	-0.162416	-0.412408	0.893527	0.751368	Unchanged	Unchanged
Rela	cGAS-STING Pathway	6.88625	6.95906	6.42519	0.0728033	-0.461061	1.05176	0.726452	Unchanged	Unchanged
Ifit2	cGAS-STING Pathway	5.00664	5.09739	5.06075	0.0907492	0.054114	1.06492	1.03822	Unchanged	Unchanged
Irf3	cGAS-STING Pathway	4.6533	4.9169	4.95405	0.263599	0.300751	1.20047	1.23179	Unchanged	Unchanged
Sting1	cGAS-STING Pathway	5.53143	6.13126	5.99433	0.59983	0.462894	1.51554	1.3783	Up	Unchanged
Oasl1	cGAS-STING Pathway	3.59638	4.25461	1.41876	0.658226	-2.17762	1.57814	0.221039	Up	Down
Oasl2	cGAS-STING Pathway	4.04317	6.11277	3.66645	2.06961	-0.37672	4.19772	0.770187	Up	Unchanged
Isg15	cGAS-STING Pathway	2.90964	5.42236	2.51837	2.51272	-0.391268	5.70695	0.762459	Up	Unchanged
Oas1a	cGAS-STING Pathway	3.14519	5.90774	4.3079	2.76255	1.16271	6.78597	2.23878	Up	Up
Ifit3	cGAS-STING Pathway	-1.40663	1.85466	-0.571317	3.26129	0.835313	9.58842	1.78424	Up	Up
Ifit1	cGAS-STING Pathway	-1.12882	3.7561	0.352086	4.88492	1.4809	29.5466	2.79123	Up	Up
Cgas	cGAS-STING Pathway	-4.1533	0.792554	0.840823	4.94586	4.99413	30.8213	31.87	Up	Up
Mx1	cGAS-STING Pathway	-4.06304	1.03789	-4.24409	5.10093	-0.181049	34.3189	0.882061	Up	Unchanged
Irf7	cGAS-STING Pathway	-0.889777	4.50284	1.65431	5.39262	2.54409	42.0088	5.8324	Up	Up

## Sheet: Pathway_Summary
Pathway	Total_Genes	Detected	Mean_NT2.5	Mean_LM	Mean_LV	Mean_log2FC_LM	Mean_log2FC_LV	SD_log2FC_LM	SD_log2FC_LV	Down_LM	Up_LM	Unchanged_LM	Down_LV	Up_LV	Unchanged_LV	Pct_Down_LM	Pct_Up_LM	Pct_Down_LV	Pct_Up_LV
Homologous Recombination	22	21	5.26177	4.33557	5.23002	-0.926199	-0.0317533	0.769196	0.301254	16	2	3	2	2	17	76.1905	9.52381	9.52381	9.52381
DNA Replication	13	13	5.907	5.10692	5.73619	-0.80008	-0.17081	0.665962	0.302538	8	0	5	2	1	10	61.5385	0	15.3846	7.69231
Mismatch Repair	7	7	5.11023	4.50979	5.02166	-0.600446	-0.0885774	0.725667	0.327336	4	0	3	1	0	6	57.1429	0	14.2857	0
Cell Cycle Checkpoints	9	7	4.71236	4.83273	4.83133	0.120367	0.118968	0.831212	0.32831	1	2	4	0	0	7	14.2857	28.5714	0	0
PARP Family	13	13	4.99944	5.19035	5.01019	0.190905	0.0107531	0.666982	0.494171	2	5	6	3	1	9	15.3846	38.4615	23.0769	7.69231
MYC Family	8	5	3.67073	3.97701	4.38235	0.30628	0.711624	1.75538	2.39113	1	1	3	1	1	3	20	20	20	20
Chromatin Remodeling	4	4	6.57139	6.89717	6.90803	0.325783	0.336638	0.420184	0.224834	0	2	2	0	1	3	0	50	0	25
cGAS-STING Pathway	24	18	2.92671	4.61789	3.20325	1.69118	0.27654	2.2094	1.61638	2	10	6	3	5	10	11.1111	55.5556	16.6667	27.7778

## Sheet: HR_Pathway
GeneID	GeneName	NT2.5	NT2.5LM	NT2.5LV	log2FC_LM_vs_NT2.5	log2FC_LV_vs_NT2.5	log2FC_LM_vs_LV	FoldChange_LM	FoldChange_LV	Change_LM	Change_LV	Pathway	In_DDR
ENSMUSG00000039748.11	Exo1	5.78918	3.78013	5.24868	-2.00905	-0.540501	-1.46855	0.248437	0.687532	Down	Down	Homologous Recombination	TRUE
ENSMUSG00000030346.16	Rad51ap1	5.0569	3.06477	4.95657	-1.99213	-0.100334	-1.8918	0.251367	0.932817	Down	Unchanged	Homologous Recombination	TRUE
ENSMUSG00000034329.16	Brip1	5.41494	3.65878	5.31281	-1.75616	-0.102127	-1.65403	0.296036	0.931658	Down	Unchanged	Homologous Recombination	TRUE
ENSMUSG00000017146.12	Brca1	6.45495	4.89826	6.22182	-1.55669	-0.233129	-1.32356	0.33993	0.850788	Down	Unchanged	Homologous Recombination	TRUE
ENSMUSG00000028884.14	Rpa2	5.4798	4.02573	5.3179	-1.45406	-0.161901	-1.29216	0.364992	0.893847	Down	Unchanged	Homologous Recombination	TRUE
ENSMUSG00000027323.10	Rad51	6.65569	5.20649	6.09638	-1.44919	-0.559306	-0.889888	0.366226	0.678628	Down	Down	Homologous Recombination	TRUE
ENSMUSG00000059060.15	Rad51b	3.42031	2.08492	3.49403	-1.33539	0.0737191	-1.40911	0.396284	1.05243	Down	Unchanged	Homologous Recombination	TRUE
ENSMUSG00000044702.13	Palb2	2.48276	1.20089	2.67442	-1.28187	0.191659	-1.47353	0.411261	1.14208	Down	Unchanged	Homologous Recombination	TRUE
ENSMUSG00000031928.15	Mre11a	6.59636	5.37228	6.43518	-1.22408	-0.161183	-1.06289	0.428072	0.894291	Down	Unchanged	Homologous Recombination	TRUE
ENSMUSG00000078773.11	Rad54b	3.67098	2.52172	3.56096	-1.14926	-0.110021	-1.03924	0.450855	0.926575	Down	Unchanged	Homologous Recombination	TRUE
ENSMUSG00000026196.7	Bard1	5.00338	3.96994	5.30364	-1.03344	0.300258	-1.3337	0.488545	1.23136	Down	Unchanged	Homologous Recombination	TRUE
ENSMUSG00000000751.13	Rpa1	7.96303	7.01138	7.48396	-0.951654	-0.479077	-0.472577	0.517039	0.717436	Down	Unchanged	Homologous Recombination	TRUE
ENSMUSG00000028702.15	Rad54l	4.2734	3.3958	4.17959	-0.877599	-0.0938048	-0.783794	0.544273	0.937048	Down	Unchanged	Homologous Recombination	TRUE
ENSMUSG00000007646.13	Rad51c	4.39837	3.53689	4.38916	-0.861486	-0.00921144	-0.852275	0.550385	0.993635	Down	Unchanged	Homologous Recombination	TRUE
ENSMUSG00000085208.3	Brip1os	7.42878	6.65835	7.43101	-0.770435	0.00222996	-0.772664	0.586241	1.00155	Down	Unchanged	Homologous Recombination	TRUE
ENSMUSG00000041147.10	Brca2	5.21917	4.5661	5.23333	-0.653077	0.0141574	-0.667234	0.635923	1.00986	Down	Unchanged	Homologous Recombination	TRUE
ENSMUSG00000012483.4	Rpa3	4.72484	4.32783	5.24733	-0.397009	0.522495	-0.919504	0.759431	1.43644	Unchanged	Up	Homologous Recombination	TRUE
ENSMUSG00000020380.16	Rad50	6.3407	6.17753	6.26102	-0.163165	-0.0796729	-0.0834918	0.893064	0.946272	Unchanged	Unchanged	Homologous Recombination	TRUE
ENSMUSG00000028224.14	Nbn	4.7706	4.70827	4.82803	-0.062331	0.0574242	-0.119755	0.957715	1.04061	Unchanged	Unchanged	Homologous Recombination	TRUE
ENSMUSG00000018841.17	Rad51d	4.2711	4.9507	4.4296	0.679599	0.158503	0.521096	1.60169	1.11613	Up	Unchanged	Homologous Recombination	TRUE
ENSMUSG00000040661.6	Rad54l2	5.08194	5.93024	5.72495	0.848299	0.643004	0.205294	1.80038	1.56158	Up	Up	Homologous Recombination	TRUE

## Sheet: cGAS_STING
GeneID	GeneName	NT2.5	NT2.5LM	NT2.5LV	log2FC_LM_vs_NT2.5	log2FC_LV_vs_NT2.5	log2FC_LM_vs_LV	FoldChange_LM	FoldChange_LV	Change_LM	Change_LV	Pathway	In_DDR
ENSMUSG00000025498.15	Irf7	-0.889777	4.50284	1.65431	5.39262	2.54409	2.84853	42.0088	5.8324	Up	Up	cGAS-STING Pathway	TRUE
ENSMUSG00000000386.16	Mx1	-4.06304	1.03789	-4.24409	5.10093	-0.181049	5.28198	34.3189	0.882061	Up	Unchanged	cGAS-STING Pathway	TRUE
ENSMUSG00000032344.17	Cgas	-4.1533	0.792554	0.840823	4.94586	4.99413	-0.0482687	30.8213	31.87	Up	Up	cGAS-STING Pathway	TRUE
ENSMUSG00000034459.8	Ifit1	-1.12882	3.7561	0.352086	4.88492	1.4809	3.40402	29.5466	2.79123	Up	Up	cGAS-STING Pathway	TRUE
ENSMUSG00000074896.3	Ifit3	-1.40663	1.85466	-0.571317	3.26129	0.835313	2.42598	9.58842	1.78424	Up	Up	cGAS-STING Pathway	TRUE
ENSMUSG00000052776.10	Oas1a	3.14519	5.90774	4.3079	2.76255	1.16271	1.59984	6.78597	2.23878	Up	Up	cGAS-STING Pathway	TRUE
ENSMUSG00000035692.7	Isg15	2.90964	5.42236	2.51837	2.51272	-0.391268	2.90399	5.70695	0.762459	Up	Unchanged	cGAS-STING Pathway	TRUE
ENSMUSG00000029561.17	Oasl2	4.04317	6.11277	3.66645	2.06961	-0.37672	2.44633	4.19772	0.770187	Up	Unchanged	cGAS-STING Pathway	TRUE
ENSMUSG00000041827.15	Oasl1	3.59638	4.25461	1.41876	0.658226	-2.17762	2.83585	1.57814	0.221039	Up	Down	cGAS-STING Pathway	TRUE
ENSMUSG00000024349.10	Sting1	5.53143	6.13126	5.99433	0.59983	0.462894	0.136935	1.51554	1.3783	Up	Unchanged	cGAS-STING Pathway	TRUE
ENSMUSG00000003184.15	Irf3	4.6533	4.9169	4.95405	0.263599	0.300751	-0.0371526	1.20047	1.23179	Unchanged	Unchanged	cGAS-STING Pathway	TRUE
ENSMUSG00000045932.12	Ifit2	5.00664	5.09739	5.06075	0.0907492	0.054114	0.0366352	1.06492	1.03822	Unchanged	Unchanged	cGAS-STING Pathway	TRUE
ENSMUSG00000024927.8	Rela	6.88625	6.95906	6.42519	0.0728033	-0.461061	0.533864	1.05176	0.726452	Unchanged	Unchanged	cGAS-STING Pathway	TRUE
ENSMUSG00000021025.8	Nfkbia	5.95568	5.79327	5.54328	-0.162416	-0.412408	0.249992	0.893527	0.751368	Unchanged	Unchanged	cGAS-STING Pathway	TRUE
ENSMUSG00000028163.17	Nfkb1	7.14066	6.89496	7.21858	-0.245706	0.0779148	-0.323621	0.843403	1.05549	Unchanged	Unchanged	cGAS-STING Pathway	TRUE
ENSMUSG00000032661.9	Oas3	3.96149	3.67842	1.98742	-0.283076	-1.97408	1.691	0.821837	0.254532	Unchanged	Down	cGAS-STING Pathway	TRUE
ENSMUSG00000020115.3	Tbk1	5.77759	5.1678	5.37133	-0.60979	-0.406259	-0.203531	0.655292	0.754577	Down	Unchanged	cGAS-STING Pathway	TRUE
ENSMUSG00000042349.13	Ikbke	5.71482	4.84142	5.1602	-0.873402	-0.554626	-0.318776	0.545858	0.680834	Down	Down	cGAS-STING Pathway	TRUE

## Sheet: Downregulated_LM
GeneName	Pathway	NT2.5	NT2.5LM	NT2.5LV	log2FC_LM_vs_NT2.5	log2FC_LV_vs_NT2.5	FoldChange_LM	FoldChange_LV	Change_LM	Change_LV
Chek1	Cell Cycle Checkpoints	5.62888	4.11674	5.68464	-1.51214	0.055761	0.350591	1.03941	Down	Unchanged
Pcna	DNA Replication	8.88265	7.21934	8.70351	-1.66331	-0.179139	0.315714	0.88323	Down	Unchanged
Rfc4	DNA Replication	5.51656	4.02595	5.33887	-1.49061	-0.177683	0.355862	0.884122	Down	Unchanged
Rfc5	DNA Replication	6.44443	4.96379	6.27872	-1.48063	-0.165709	0.358332	0.89149	Down	Unchanged
Rfc2	DNA Replication	7.00681	6.00728	6.77651	-0.999528	-0.230297	0.500164	0.852459	Down	Unchanged
Rfc1	DNA Replication	7.33874	6.34131	6.78301	-0.997427	-0.555728	0.500892	0.680313	Down	Down
Rfc3	DNA Replication	5.98884	4.99203	5.99229	-0.996806	0.00344898	0.501108	1.00239	Down	Unchanged
Exo1	Homologous Recombination	5.78918	3.78013	5.24868	-2.00905	-0.540501	0.248437	0.687532	Down	Down
Rad51ap1	Homologous Recombination	5.0569	3.06477	4.95657	-1.99213	-0.100334	0.251367	0.932817	Down	Unchanged
Brip1	Homologous Recombination	5.41494	3.65878	5.31281	-1.75616	-0.102127	0.296036	0.931658	Down	Unchanged
Brca1	Homologous Recombination	6.45495	4.89826	6.22182	-1.55669	-0.233129	0.33993	0.850788	Down	Unchanged
Rpa2	Homologous Recombination	5.4798	4.02573	5.3179	-1.45406	-0.161901	0.364992	0.893847	Down	Unchanged
Rad51	Homologous Recombination	6.65569	5.20649	6.09638	-1.44919	-0.559306	0.366226	0.678628	Down	Down
Rad51b	Homologous Recombination	3.42031	2.08492	3.49403	-1.33539	0.0737191	0.396284	1.05243	Down	Unchanged
Palb2	Homologous Recombination	2.48276	1.20089	2.67442	-1.28187	0.191659	0.411261	1.14208	Down	Unchanged
Mre11a	Homologous Recombination	6.59636	5.37228	6.43518	-1.22408	-0.161183	0.428072	0.894291	Down	Unchanged
Rad54b	Homologous Recombination	3.67098	2.52172	3.56096	-1.14926	-0.110021	0.450855	0.926575	Down	Unchanged
Bard1	Homologous Recombination	5.00338	3.96994	5.30364	-1.03344	0.300258	0.488545	1.23136	Down	Unchanged
Rpa1	Homologous Recombination	7.96303	7.01138	7.48396	-0.951654	-0.479077	0.517039	0.717436	Down	Unchanged
Rad54l	Homologous Recombination	4.2734	3.3958	4.17959	-0.877599	-0.0938048	0.544273	0.937048	Down	Unchanged
Rad51c	Homologous Recombination	4.39837	3.53689	4.38916	-0.861486	-0.00921144	0.550385	0.993635	Down	Unchanged
Brip1os	Homologous Recombination	7.42878	6.65835	7.43101	-0.770435	0.00222996	0.586241	1.00155	Down	Unchanged
Brca2	Homologous Recombination	5.21917	4.5661	5.23333	-0.653077	0.0141574	0.635923	1.00986	Down	Unchanged
Mycbp	MYC Family	4.25474	2.73277	4.01162	-1.52197	-0.243124	0.34821	0.844914	Down	Unchanged
Msh6	Mismatch Repair	6.66227	5.93233	6.56768	-0.729949	-0.094591	0.602925	0.936538	Down	Unchanged
Pms2	Mismatch Repair	4.5543	3.84074	4.28862	-0.713562	-0.265682	0.609813	0.831806	Down	Unchanged
Msh3	Mismatch Repair	4.28548	3.68542	3.89542	-0.600066	-0.390064	0.659724	0.763096	Down	Unchanged
Parpbp	PARP Family	5.07182	3.68722	5.48934	-1.38461	0.417517	0.382994	1.33563	Down	Unchanged
Parp1	PARP Family	7.29371	6.70773	7.08191	-0.585982	-0.211799	0.666196	0.86346	Down	Unchanged
Ikbke	cGAS-STING Pathway	5.71482	4.84142	5.1602	-0.873402	-0.554626	0.545858	0.680834	Down	Down
Tbk1	cGAS-STING Pathway	5.77759	5.1678	5.37133	-0.60979	-0.406259	0.655292	0.754577	Down	Unchanged

## Sheet: Upregulated_LM
GeneName	Pathway	NT2.5	NT2.5LM	NT2.5LV	log2FC_LM_vs_NT2.5	log2FC_LV_vs_NT2.5	FoldChange_LM	FoldChange_LV	Change_LM	Change_LV
Atmin	Cell Cycle Checkpoints	5.11518	5.71009	4.85245	0.594915	-0.262734	1.51038	0.833507	Up	Unchanged
Atraid	Cell Cycle Checkpoints	4.60608	5.70547	5.07616	1.09938	0.470075	2.14263	1.38518	Up	Unchanged
Atrnl1	Chromatin Remodeling	6.30603	6.90065	6.67872	0.594625	0.372693	1.51008	1.29477	Up	Unchanged
Atrn	Chromatin Remodeling	6.37498	7.03783	6.50893	0.662854	0.133948	1.58321	1.09729	Up	Unchanged
Rad51d	Homologous Recombination	4.2711	4.9507	4.4296	0.679599	0.158503	1.60169	1.11613	Up	Unchanged
Rad54l2	Homologous Recombination	5.08194	5.93024	5.72495	0.848299	0.643004	1.80038	1.56158	Up	Up
Mycn	MYC Family	-2.07451	1.11864	2.85156	3.19315	4.92608	9.14607	30.4016	Up	Up
Parp3	PARP Family	4.34041	4.97032	4.83053	0.629919	0.490126	1.54748	1.40457	Up	Unchanged
Parp4	PARP Family	5.69062	6.33469	5.79527	0.644071	0.104651	1.56273	1.07523	Up	Unchanged
Parp14	PARP Family	4.39505	5.15087	4.13022	0.755823	-0.264831	1.68859	0.832296	Up	Unchanged
Parp6	PARP Family	3.95892	4.872	4.25464	0.913085	0.295727	1.88307	1.2275	Up	Unchanged
Parp10	PARP Family	5.58402	6.57366	5.0688	0.989639	-0.515221	1.98569	0.699686	Up	Down
Sting1	cGAS-STING Pathway	5.53143	6.13126	5.99433	0.59983	0.462894	1.51554	1.3783	Up	Unchanged
Oasl1	cGAS-STING Pathway	3.59638	4.25461	1.41876	0.658226	-2.17762	1.57814	0.221039	Up	Down
Oasl2	cGAS-STING Pathway	4.04317	6.11277	3.66645	2.06961	-0.37672	4.19772	0.770187	Up	Unchanged
Isg15	cGAS-STING Pathway	2.90964	5.42236	2.51837	2.51272	-0.391268	5.70695	0.762459	Up	Unchanged
Oas1a	cGAS-STING Pathway	3.14519	5.90774	4.3079	2.76255	1.16271	6.78597	2.23878	Up	Up
Ifit3	cGAS-STING Pathway	-1.40663	1.85466	-0.571317	3.26129	0.835313	9.58842	1.78424	Up	Up
Ifit1	cGAS-STING Pathway	-1.12882	3.7561	0.352086	4.88492	1.4809	29.5466	2.79123	Up	Up
Cgas	cGAS-STING Pathway	-4.1533	0.792554	0.840823	4.94586	4.99413	30.8213	31.87	Up	Up
Mx1	cGAS-STING Pathway	-4.06304	1.03789	-4.24409	5.10093	-0.181049	34.3189	0.882061	Up	Unchanged
Irf7	cGAS-STING Pathway	-0.889777	4.50284	1.65431	5.39262	2.54409	42.0088	5.8324	Up	Up
