# Supplementary material
Source: Research Square preprint supplement (doi:10.21203/rs.3.rs-8991205/v1)
Supplement: Supplementary file 6 [file eee810872771145fa95150f2.xlsx]

## Sheet: MMP_genes
Gene	NT2.5 (Parent)	NT2.5LM	NT2.5LV	Difference (LV-LM)
Mmp10	4.7	0.01	5.38	5.37
Mmp3	4.63	2.41	6.76	4.35
Mmp24	3.87	0.65	4.01	3.36
Mmp9	5.86	5.23	7.69	2.46
Mmp12	1.57	-0.35	2.11	2.46
Klk6	4.12	7.48	9.09	1.61
Ctsk	-3.14	-7.21	-5.63	1.58
Mmp13	2.25	4.25	5.78	1.54

## Sheet: Metabolic_genes
Gene	Pathway	NT2.5_Parent	NT2.5LM	NT2.5LV	Diff_LV_minus_LM
Cpt1a	Fatty_Acid_Oxidation	6.3734	5.2827	4.52421	-0.758488
Acadvl	Fatty_Acid_Oxidation	5.47706	6.06624	5.46996	-0.596278
Acaa2	Fatty_Acid_Oxidation	6.04881	7.06036	6.61849	-0.441877
Ech1	Fatty_Acid_Oxidation	5.26612	5.52789	5.25252	-0.275366
Acadl	Fatty_Acid_Oxidation	7.43977	7.23941	7.34093	0.101521
Hadha	Fatty_Acid_Oxidation	7.78767	7.50777	7.62747	0.119701
Hadhb	Fatty_Acid_Oxidation	6.66597	6.01222	6.18903	0.176806
Echs1	Fatty_Acid_Oxidation	5.53057	5.80169	6.15204	0.350349
Cpt2	Fatty_Acid_Oxidation	3.85059	3.84099	4.19468	0.353684
Acadm	Fatty_Acid_Oxidation	5.39946	4.47506	4.84579	0.370728
Cpt1b	Fatty_Acid_Oxidation	-4.92729	-7.21473	-4.55577	2.65895
Acacb	Fatty_Acid_Synthesis	1.8365	2.78704	1.58451	-1.20253
Scd1	Fatty_Acid_Synthesis	4.49498	8.57205	7.88814	-0.683911
Acly	Fatty_Acid_Synthesis	7.90754	7.9297	8.16366	0.233953
Elovl6	Fatty_Acid_Synthesis	3.1353	3.66106	3.92187	0.260809
Fasn	Fatty_Acid_Synthesis	8.93184	8.95896	9.23568	0.276714
Elovl5	Fatty_Acid_Synthesis	6.24848	6.44665	6.72989	0.283239
Elovl1	Fatty_Acid_Synthesis	5.35619	4.97274	5.31741	0.344679
Acaca	Fatty_Acid_Synthesis	6.90511	7.61842	8.09429	0.475871
Scd2	Fatty_Acid_Synthesis	7.70943	9.34348	10.3177	0.974239
Gpt2	Glutamine_Metabolism	5.22506	7.16999	5.24859	-1.9214
Got1	Glutamine_Metabolism	6.53366	6.4777	5.91781	-0.559884
Gpt	Glutamine_Metabolism	2.79954	2.33986	2.05065	-0.289216
Glul	Glutamine_Metabolism	6.18606	4.78092	4.8611	0.0801775
Got2	Glutamine_Metabolism	8.31459	7.90761	8.08677	0.17916
Glud1	Glutamine_Metabolism	7.64975	7.18073	7.57623	0.395504
Gls2	Glutamine_Metabolism	0.864943	1.55454	2.06396	0.509422
Gls	Glutamine_Metabolism	8.74211	8.10582	8.73335	0.627535
Hk3	Glycolysis	-6.12391	-5.61365	-7.21473	-1.60107
Ldhb	Glycolysis	6.31371	6.84333	6.42002	-0.423307
Eno2	Glycolysis	3.1762	4.24423	3.83127	-0.412958
Aldoa	Glycolysis	-0.80481	-0.618682	-0.824197	-0.205515
Hk2	Glycolysis	6.33417	6.42493	6.27464	-0.150296
Pfkm	Glycolysis	5.70991	5.72391	5.58581	-0.138097
Aldob	Glycolysis	-7.21473	-7.21473	-7.21473	0
Pgk2	Glycolysis	-7.21473	-7.21473	-7.21473	0
Eno3	Glycolysis	7.90809	1.47049	1.56881	0.0983213
Hk1	Glycolysis	7.50157	7.40665	7.68945	0.282805
Pfkp	Glycolysis	6.14601	6.36585	6.91328	0.547439
Aldoa	Glycolysis	9.48717	9.10171	9.84327	0.741553
Aldoc	Glycolysis	2.25583	3.9579	4.81658	0.858683
Pfkl	Glycolysis	7.76617	7.63353	8.60987	0.976336
Gapdh	Glycolysis	11.6195	10.4889	11.6877	1.19889
Eno1	Glycolysis	10.3613	9.23684	10.6674	1.43055
Pkm	Glycolysis	11.4841	9.97585	11.7722	1.79634
Pgk1	Glycolysis	10.3251	8.48925	10.5035	2.01427
Ldha	Glycolysis	10.4805	8.69394	10.7696	2.0757
Mthfd2	One_Carbon_Metabolism	6.94276	7.75589	6.2619	-1.49399
Phgdh	One_Carbon_Metabolism	7.98375	7.29556	6.06961	-1.22595
Mthfr	One_Carbon_Metabolism	2.92817	3.93852	2.88053	-1.05799
Psat1	One_Carbon_Metabolism	8.14202	8.19205	7.50987	-0.68218
Shmt2	One_Carbon_Metabolism	7.37418	7.59513	6.94472	-0.650408
Shmt1	One_Carbon_Metabolism	4.86412	5.02093	5.15552	0.13459
Mthfd1	One_Carbon_Metabolism	6.99121	6.60662	6.91055	0.303927
Cox7a1	Oxidative_Phosphorylation	-2.23172	-1.78551	-4.14114	-2.35563
Uqcrfs1	Oxidative_Phosphorylation	6.4276	6.19666	6.06268	-0.13398
Ndufs3	Oxidative_Phosphorylation	5.98425	6.101	5.9795	-0.1215
Sdha	Oxidative_Phosphorylation	7.25686	7.12259	7.04637	-0.0762204
Ndufa9	Oxidative_Phosphorylation	6.69865	6.33063	6.27313	-0.0575009
Atp5a1	Oxidative_Phosphorylation	9.63834	9.90168	9.88558	-0.0161018
Cox5a	Oxidative_Phosphorylation	5.7384	5.58296	5.56901	-0.0139513
Cox6a1	Oxidative_Phosphorylation	8.38444	8.24317	8.30662	0.0634492
Cox5b	Oxidative_Phosphorylation	6.38603	6.39996	6.50216	0.102203
Atp5b	Oxidative_Phosphorylation	10.4557	10.2852	10.3945	0.109343
Cox4i1	Oxidative_Phosphorylation	8.5647	8.28311	8.39608	0.112972
Uqcrc2	Oxidative_Phosphorylation	6.98433	6.52445	6.80556	0.281111
Uqcrc1	Oxidative_Phosphorylation	7.31111	7.63076	7.92795	0.297194
Ndufs1	Oxidative_Phosphorylation	6.7714	6.51094	6.86003	0.349092
Ndufb8	Oxidative_Phosphorylation	5.96054	5.59206	5.9685	0.37644
Atp5c1	Oxidative_Phosphorylation	8.036	7.5422	7.98232	0.440123
Sdhb	Oxidative_Phosphorylation	6.5684	6.02665	6.48589	0.45924
Taldo1	Pentose_Phosphate_Pathway	6.91543	7.13782	6.90069	-0.237133
G6pdx	Pentose_Phosphate_Pathway	7.32144	6.82797	6.80092	-0.0270516
Tkt	Pentose_Phosphate_Pathway	8.06474	8.31385	8.39803	0.0841827
Pgd	Pentose_Phosphate_Pathway	7.54748	6.76838	6.98501	0.216626
Ogdh	TCA_Cycle	8.00513	7.8347	7.51692	-0.317779
Suclg2	TCA_Cycle	5.99222	6.30846	6.13117	-0.177291
Sucla2	TCA_Cycle	6.57043	6.60389	6.65278	0.048892
Aco1	TCA_Cycle	5.58797	6.02853	6.08485	0.0563234
Cs	TCA_Cycle	8.45364	7.96731	8.04945	0.0821449
Mdh2	TCA_Cycle	8.75712	8.41912	8.50401	0.0848851
Aco2	TCA_Cycle	7.83003	7.88848	8.02686	0.138378
Idh2	TCA_Cycle	6.39865	6.41374	6.58155	0.167812
Idh3a	TCA_Cycle	7.54084	7.03183	7.27814	0.246311
Suclg1	TCA_Cycle	6.77316	6.29598	6.69466	0.398673
Sdhc	TCA_Cycle	6.85073	6.65617	7.05814	0.401967
Sdhd	TCA_Cycle	7.17539	6.24717	6.82755	0.580373
Mdh1	TCA_Cycle	8.08112	7.61071	8.32787	0.717162
Idh1	TCA_Cycle	4.95302	5.54985	6.51304	0.963188

## Sheet: Integrins_genes
GeneName	NT2.5	NT2.5LM	NT2.5LV	LM_vs_Parent	LV_vs_Parent	LV_vs_LM
Itga1	5.359	-1.911	-0.027	-7.27	-5.386	1.884
Itga10	-0.734	0.453	0.76	1.187	1.494	0.307
Itga11	2.67	1.312	1.484	-1.358	-1.186	0.172
Itga2	7.54	4.967	6.431	-2.573	-1.109	1.464
Itga2b	0.545	-0.054	-0.166	-0.598	-0.711	-0.113
Itga3	10.946	10.365	10.649	-0.581	-0.296	0.284
Itga4	-7.215	-7.215	-7.215	0	0	0
Itga5	5.23	4.64	4.066	-0.59	-1.164	-0.574
Itga6	7.921	7.13	7.242	-0.791	-0.68	0.112
Itga7	2.57	2.403	4.326	-0.168	1.756	1.924
Itga8	4.994	8.08	7.868	3.085	2.874	-0.212
Itga9	-3.985	-2.397	-2.447	1.588	1.539	-0.05
Itgad	-7.215	-4.875	-7.215	2.339	0	-2.339
Itgae	-0.44	-0.478	-0.426	-0.038	0.014	0.052
Itgal	-7.215	-7.215	-7.215	0	0	0
Itgam	-7.215	-7.215	-7.215	0	0	0
Itgav	8.271	8.149	8.335	-0.122	0.065	0.187
Itgax	-5.739	-4.816	-7.215	0.923	-1.475	-2.399
Itgb1	11.489	11.024	12.027	-0.465	0.538	1.002
Itgb2	3.875	6.456	5.019	2.581	1.143	-1.438
Itgb3	5.205	5.696	6.303	0.49	1.097	0.607
Itgb4	9.234	9.204	9.487	-0.031	0.253	0.283
Itgb5	8.053	7.936	8.171	-0.117	0.118	0.234
Itgb6	5.496	4.79	4.17	-0.707	-1.327	-0.62
Itgb7	2.326	-4.329	-3.927	-6.655	-6.253	0.402
Itgb8	1.399	5.894	5.026	4.495	3.627	-0.868
Itgbl1	-7.215	-5.096	-7.215	2.119	0	-2.119
